# Supplementary material for: Deciphering drought response mechanism in Tibetan qingke through comprehensive transcriptomic and physiological analysis
Source: Front Plant Sci. 2025 Jul 25;16:1633561. doi: 10.3389/fpls.2025.1633561 (PMC12331675; doi:10.3389/fpls.2025.1633561)
Supplement: Supplementary file 2 [file Table1.xlsx]

## Sheet: Supplementary Table S1
Supplementary Table S1. Evaluation of RNA sequence data quality
sample	raw_reads	clean_reads	Q30	total_map	unique_map	multi_map
YC83_1_CK	47526358	46723124	93.84	43783489(93.71%)	42636060(91.25%)	1147429(2.46%)
YC83_2_CK	50255770	49296648	93.34	46608206(94.55%)	44876472(91.03%)	1731734(3.51%)
YC83_3_CK	49543518	48672512	94.13	46282243(95.09%)	43860502(90.11%)	2421741(4.98%)
YC83_1_PEG	47321864	46186320	93.23	43072188(93.26%)	40886258(88.52%)	2185930(4.73%)
YC83_2_PEG	49855622	48749936	93.6	45393852(93.12%)	43687065(89.61%)	1706787(3.5%)
YC83_3_PEG	53298580	52202350	92.82	49139410(94.13%)	47041275(90.11%)	2098135(4.02%)
YC85_1_CK	61889354	60630666	93.88	55961130(92.3%)	54389730(89.71%)	1571400(2.59%)
YC85_2_CK	48203628	46778354	93.71	42583286(91.03%)	41571784(88.87%)	1011502(2.16%)
YC85_3_CK	48368374	47665662	93.4	44325769(92.99%)	42643198(89.46%)	1682571(3.53%)
YC85_1_PEG	50152966	49478916	93.41	46207443(93.39%)	45058273(91.07%)	1149170(2.32%)
YC85_2_PEG	46856942	45953672	93.16	42729855(92.98%)	41701618(90.75%)	1028237(2.24%)
YC85_3_PEG	47958422	47047066	93.52	44021440(93.57%)	42713841(90.79%)	1307599(2.78%)
YC88_1_CK	49039050	48023108	93.38	45034973(93.78%)	43550080(90.69%)	1484893(3.09%)
YC88_2_CK	46522334	45279680	93.49	40846165(90.21%)	39542087(87.33%)	1304078(2.88%)
YC88_3_CK	58578454	57861428	93.35	53596442(92.63%)	51885313(89.67%)	1711129(2.96%)
YC88_1_PEG	46042248	45417786	93.34	42430850(93.42%)	40939690(90.14%)	1491160(3.28%)
YC88_2_PEG	47130862	46418376	93.03	43514689(93.74%)	42125048(90.75%)	1389641(2.99%)
YC88_3_PEG	60964962	60078494	93.27	56628059(94.26%)	54570659(90.83%)	2057400(3.42%)
ZY97_1_CK	46627762	45850618	93.61	43306507(94.45%)	41367607(90.22%)	1938900(4.23%)
ZY97_2_CK	54235796	52981806	93.37	32350143(61.06%)	31623547(59.69%)	726596(1.37%)
ZY97_3_CK	46023860	45073870	92.59	42365460(93.99%)	40708317(90.31%)	1657143(3.68%)
ZY97_1_PEG	63971760	62354956	93.52	58581497(93.95%)	56416594(90.48%)	2164903(3.47%)
ZY97_2_PEG	49856228	48927570	93.64	46364812(94.76%)	43742410(89.4%)	2622402(5.36%)
ZY97_3_PEG	49050180	48115432	93.56	45420980(94.4%)	43474944(90.36%)	1946036(4.04%)
ZY1100_1_CK	50315860	49516780	93.74	46406328(93.72%)	44900004(90.68%)	1506324(3.04%)
ZY1100_2_CK	46597366	45870524	93.19	42866639(93.45%)	41236532(89.9%)	1630107(3.55%)
ZY1100_3_CK	51448876	50587306	93.08	46163626(91.26%)	44875091(88.71%)	1288535(2.55%)
ZY1100_1_PEG	50804756	50048050	93.16	40485980(80.89%)	39296566(78.52%)	1189414(2.38%)
ZY1100_2_PEG	50651200	49643112	93.44	45637606(91.93%)	44423734(89.49%)	1213872(2.45%)
ZY1100_3_PEG	48281154	47370832	93.07	44246123(93.4%)	42894940(90.55%)	1351183(2.85%)
ZY1252_1_CK	58546676	57467912	94.14	53269461(92.69%)	50319824(87.56%)	2949637(5.13%)
ZY1252_2_CK	46915850	45996156	94.02	43314345(94.17%)	41374110(89.95%)	1940235(4.22%)
ZY1252_3_CK	46586520	45573590	93.46	43281261(94.97%)	40304309(88.44%)	2976952(6.53%)
ZY1252_1_PEG	47929100	46971574	93.16	42972788(91.49%)	41445641(88.24%)	1527147(3.25%)
ZY1252_2_PEG	48889306	47971116	93.63	44801043(93.39%)	42559309(88.72%)	2241734(4.67%)
ZY1252_3_PEG	49996798	49072738	93.53	46530447(94.82%)	44586274(90.86%)	1944173(3.96%)
