# Supplementary material for: Deciphering drought response mechanism in Tibetan qingke through comprehensive transcriptomic and physiological analysis
Source: Front Plant Sci. 2025 Jul 25;16:1633561. doi: 10.3389/fpls.2025.1633561 (PMC12331675; doi:10.3389/fpls.2025.1633561)
Supplement: Supplementary file 3 [file Table2.xlsx]

## Sheet: Supplementary Table S2
Supplementary Table S2. The lists of DEGs.

## Sheet: YC83-PEG_vs_YC83-CK_Down
HORVU_MOREX_r3_7HG0668940
HORVU_MOREX_r3_6HG0545620
HORVU_MOREX_r3_6HG0596770
HORVU_MOREX_r3_3HG0279950
HORVU_MOREX_r3_7HG0639870
HORVU_MOREX_r3_6HG0618650
HORVU_MOREX_r3_2HG0181050
HORVU_MOREX_r3_7HG0661070
HORVU_MOREX_r3_4HG0335340
HORVU_MOREX_r3_4HG0334480
HORVU_MOREX_r3_1HG0090130
HORVU_MOREX_r3_6HG0541440
novel.24
HORVU_MOREX_r3_6HG0634000
HORVU_MOREX_r3_2HG0135060
HORVU_MOREX_r3_4HG0339820
HORVU_MOREX_r3_7HG0670510
HORVU_MOREX_r3_7HG0664030
HORVU_MOREX_r3_5HG0428660
HORVU_MOREX_r3_6HG0597040
HORVU_MOREX_r3_3HG0219270
HORVU_MOREX_r3_2HG0131150
HORVU_MOREX_r3_6HG0604810
HORVU_MOREX_r3_5HG0523250
HORVU_MOREX_r3_4HG0413910
HORVU_MOREX_r3_4HG0383820
HORVU_MOREX_r3_4HG0415520
HORVU_MOREX_r3_1HG0051910
HORVU_MOREX_r3_5HG0528590
HORVU_MOREX_r3_3HG0252170
HORVU_MOREX_r3_2HG0102890
HORVU_MOREX_r3_5HG0474130
HORVU_MOREX_r3_1HG0019970
HORVU_MOREX_r3_7HG0640060
HORVU_MOREX_r3_2HG0212050
HORVU_MOREX_r3_7HG0723260
HORVU_MOREX_r3_3HG0291440
HORVU_MOREX_r3_6HG0627900
HORVU_MOREX_r3_7HG0719310
HORVU_MOREX_r3_5HG0484690
HORVU_MOREX_r3_7HG0746260
HORVU_MOREX_r3_4HG0337000
novel.6370
HORVU_MOREX_r3_7HG0639840
HORVU_MOREX_r3_6HG0608780
HORVU_MOREX_r3_6HG0555660
HORVU_MOREX_r3_3HG0275790
HORVU_MOREX_r3_3HG0326880
HORVU_MOREX_r3_6HG0564570
HORVU_MOREX_r3_2HG0204220
HORVU_MOREX_r3_3HG0219610
HORVU_MOREX_r3_1HG0092660
novel.1765
HORVU_MOREX_r3_1HG0091390
HORVU_MOREX_r3_2HG0160240
novel.2038
HORVU_MOREX_r3_3HG0225300
novel.5118
HORVU_MOREX_r3_2HG0175570
HORVU_MOREX_r3_5HG0510990
HORVU_MOREX_r3_7HG0743280
HORVU_MOREX_r3_6HG0555700
HORVU_MOREX_r3_7HG0719300
HORVU_MOREX_r3_2HG0112640
HORVU_MOREX_r3_3HG0330590
HORVU_MOREX_r3_6HG0631490
HORVU_MOREX_r3_4HG0354730
HORVU_MOREX_r3_7HG0740120
HORVU_MOREX_r3_4HG0403960
HORVU_MOREX_r3_7HG0729020
HORVU_MOREX_r3_6HG0574250
HORVU_MOREX_r3_2HG0122140
HORVU_MOREX_r3_1HG0021970
HORVU_MOREX_r3_3HG0277190
HORVU_MOREX_r3_2HG0157210
HORVU_MOREX_r3_2HG0212570
HORVU_MOREX_r3_1HG0093920
HORVU_MOREX_r3_4HG0333410
HORVU_MOREX_r3_1HG0092880
HORVU_MOREX_r3_4HG0392820
HORVU_MOREX_r3_7HG0667900
HORVU_MOREX_r3_5HG0444170
HORVU_MOREX_r3_7HG0679840
HORVU_MOREX_r3_3HG0321860
HORVU_MOREX_r3_6HG0560030
HORVU_MOREX_r3_5HG0420180
HORVU_MOREX_r3_7HG0657520
HORVU_MOREX_r3_7HG0642030
HORVU_MOREX_r3_4HG0396670
HORVU_MOREX_r3_6HG0618640
HORVU_MOREX_r3_4HG0399920
HORVU_MOREX_r3_3HG0306270
HORVU_MOREX_r3_7HG0640590
HORVU_MOREX_r3_4HG0394720
HORVU_MOREX_r3_1HG0048080
HORVU_MOREX_r3_6HG0630920
HORVU_MOREX_r3_3HG0227830
HORVU_MOREX_r3_7HG0746770
HORVU_MOREX_r3_2HG0191770
HORVU_MOREX_r3_7HG0708960
HORVU_MOREX_r3_4HG0338460
HORVU_MOREX_r3_5HG0516270
HORVU_MOREX_r3_2HG0102640
HORVU_MOREX_r3_6HG0622740
HORVU_MOREX_r3_3HG0301110
HORVU_MOREX_r3_6HG0555040
HORVU_MOREX_r3_3HG0304260
HORVU_MOREX_r3_1HG0071710
HORVU_MOREX_r3_5HG0480710
HORVU_MOREX_r3_1HG0002510
HORVU_MOREX_r3_2HG0204100
HORVU_MOREX_r3_4HG0405730
HORVU_MOREX_r3_2HG0095510
HORVU_MOREX_r3_2HG0125520
novel.3721
HORVU_MOREX_r3_2HG0198150
HORVU_MOREX_r3_3HG0221160
HORVU_MOREX_r3_2HG0126300
HORVU_MOREX_r3_3HG0231420
HORVU_MOREX_r3_1HG0047110
HORVU_MOREX_r3_7HG0708000
HORVU_MOREX_r3_5HG0502220
HORVU_MOREX_r3_1HG0026240
HORVU_MOREX_r3_3HG0227850
HORVU_MOREX_r3_1HG0071210
HORVU_MOREX_r3_2HG0102630
HORVU_MOREX_r3_3HG0318390
HORVU_MOREX_r3_7HG0648480
HORVU_MOREX_r3_5HG0492030
HORVU_MOREX_r3_6HG0561620
HORVU_MOREX_r3_5HG0463590
HORVU_MOREX_r3_2HG0199720
HORVU_MOREX_r3_6HG0559430
novel.980
HORVU_MOREX_r3_7HG0648470
HORVU_MOREX_r3_5HG0428440
HORVU_MOREX_r3_5HG0486090
HORVU_MOREX_r3_2HG0108920
HORVU_MOREX_r3_3HG0315260
HORVU_MOREX_r3_3HG0236150
HORVU_MOREX_r3_6HG0597400
HORVU_MOREX_r3_2HG0176240
HORVU_MOREX_r3_2HG0195070
HORVU_MOREX_r3_3HG0287850
HORVU_MOREX_r3_7HG0659990
HORVU_MOREX_r3_7HG0703460
HORVU_MOREX_r3_1HG0081150
HORVU_MOREX_r3_5HG0524540
HORVU_MOREX_r3_4HG0381960
HORVU_MOREX_r3_3HG0319010
HORVU_MOREX_r3_5HG0512730
HORVU_MOREX_r3_7HG0654310
HORVU_MOREX_r3_6HG0627380
HORVU_MOREX_r3_6HG0567430
novel.538
HORVU_MOREX_r3_4HG0346720
HORVU_MOREX_r3_6HG0608180
HORVU_MOREX_r3_3HG0318840
HORVU_MOREX_r3_3HG0310480
HORVU_MOREX_r3_2HG0175560
HORVU_MOREX_r3_5HG0530740
HORVU_MOREX_r3_5HG0444870
HORVU_MOREX_r3_5HG0475380
HORVU_MOREX_r3_3HG0299690
HORVU_MOREX_r3_5HG0476180
HORVU_MOREX_r3_2HG0182840
HORVU_MOREX_r3_5HG0464880
HORVU_MOREX_r3_7HG0681950
HORVU_MOREX_r3_3HG0274050
HORVU_MOREX_r3_4HG0344970
HORVU_MOREX_r3_3HG0296410
HORVU_MOREX_r3_1HG0046330
HORVU_MOREX_r3_6HG0622970
HORVU_MOREX_r3_6HG0630900
HORVU_MOREX_r3_7HG0696450
HORVU_MOREX_r3_5HG0513630
HORVU_MOREX_r3_7HG0736410
HORVU_MOREX_r3_7HG0672850
HORVU_MOREX_r3_7HG0738120
HORVU_MOREX_r3_3HG0300120
HORVU_MOREX_r3_5HG0511630
novel.1521
HORVU_MOREX_r3_5HG0502770
HORVU_MOREX_r3_5HG0491130
HORVU_MOREX_r3_3HG0312560
HORVU_MOREX_r3_4HG0369360
HORVU_MOREX_r3_3HG0299310
HORVU_MOREX_r3_1HG0058310
HORVU_MOREX_r3_2HG0214130
HORVU_MOREX_r3_3HG0326310
HORVU_MOREX_r3_6HG0600160
HORVU_MOREX_r3_6HG0550840
HORVU_MOREX_r3_5HG0465820
HORVU_MOREX_r3_1HG0046320
HORVU_MOREX_r3_2HG0198370
HORVU_MOREX_r3_5HG0444200
HORVU_MOREX_r3_2HG0208690
HORVU_MOREX_r3_5HG0487570
HORVU_MOREX_r3_5HG0487860
HORVU_MOREX_r3_2HG0189720
HORVU_MOREX_r3_6HG0633420
HORVU_MOREX_r3_4HG0412300
HORVU_MOREX_r3_6HG0559440
HORVU_MOREX_r3_6HG0574410
HORVU_MOREX_r3_1HG0077000
novel.5311
HORVU_MOREX_r3_5HG0463860
HORVU_MOREX_r3_1HG0002080
HORVU_MOREX_r3_1HG0004730
HORVU_MOREX_r3_2HG0136510
HORVU_MOREX_r3_2HG0215980
HORVU_MOREX_r3_7HG0686490
novel.4966
HORVU_MOREX_r3_1HG0048010
HORVU_MOREX_r3_6HG0633720
HORVU_MOREX_r3_1HG0092670
HORVU_MOREX_r3_4HG0354140
HORVU_MOREX_r3_2HG0215650
novel.7124
HORVU_MOREX_r3_2HG0204520
HORVU_MOREX_r3_5HG0429040
HORVU_MOREX_r3_7HG0737910
HORVU_MOREX_r3_2HG0211850
HORVU_MOREX_r3_7HG0648440
HORVU_MOREX_r3_2HG0164700
HORVU_MOREX_r3_2HG0098910
HORVU_MOREX_r3_4HG0375390
HORVU_MOREX_r3_1HG0074260
HORVU_MOREX_r3_7HG0742860
HORVU_MOREX_r3_7HG0714930
HORVU_MOREX_r3_1HG0021360
HORVU_MOREX_r3_4HG0346810
HORVU_MOREX_r3_5HG0494070
HORVU_MOREX_r3_3HG0303900
HORVU_MOREX_r3_7HG0717720
HORVU_MOREX_r3_1HG0086540
HORVU_MOREX_r3_3HG0299560
HORVU_MOREX_r3_5HG0449730
HORVU_MOREX_r3_7HG0722560
HORVU_MOREX_r3_7HG0717480
novel.5263
HORVU_MOREX_r3_1HG0084740
novel.1020
HORVU_MOREX_r3_4HG0410020
HORVU_MOREX_r3_7HG0705260
HORVU_MOREX_r3_5HG0471680
HORVU_MOREX_r3_7HG0745620
HORVU_MOREX_r3_2HG0174680
HORVU_MOREX_r3_4HG0336570
HORVU_MOREX_r3_6HG0545390
HORVU_MOREX_r3_5HG0505950
HORVU_MOREX_r3_4HG0379610
HORVU_MOREX_r3_1HG0071020
HORVU_MOREX_r3_2HG0123480
HORVU_MOREX_r3_6HG0604310
HORVU_MOREX_r3_5HG0484220
HORVU_MOREX_r3_3HG0286390
novel.1060
HORVU_MOREX_r3_1HG0029360
HORVU_MOREX_r3_1HG0021770
HORVU_MOREX_r3_2HG0138730
HORVU_MOREX_r3_2HG0112580
HORVU_MOREX_r3_5HG0421580
HORVU_MOREX_r3_2HG0189850
HORVU_MOREX_r3_7HG0648500
HORVU_MOREX_r3_2HG0193290
HORVU_MOREX_r3_1HG0009460
HORVU_MOREX_r3_1HG0084680
HORVU_MOREX_r3_4HG0392440
HORVU_MOREX_r3_2HG0175220
HORVU_MOREX_r3_7HG0715150
HORVU_MOREX_r3_5HG0508550
HORVU_MOREX_r3_1HG0048090
HORVU_MOREX_r3_3HG0246190
novel.3623
HORVU_MOREX_r3_2HG0116820
HORVU_MOREX_r3_4HG0378760
HORVU_MOREX_r3_3HG0286300
HORVU_MOREX_r3_7HG0729950
HORVU_MOREX_r3_5HG0431750
novel.5205
HORVU_MOREX_r3_7HG0675630
HORVU_MOREX_r3_7HG0739150
HORVU_MOREX_r3_6HG0598130
HORVU_MOREX_r3_4HG0392480
HORVU_MOREX_r3_4HG0394990
HORVU_MOREX_r3_1HG0073090
HORVU_MOREX_r3_6HG0555630
HORVU_MOREX_r3_1HG0015250
HORVU_MOREX_r3_3HG0304380
HORVU_MOREX_r3_1HG0029060
HORVU_MOREX_r3_3HG0265990
HORVU_MOREX_r3_3HG0240640
HORVU_MOREX_r3_7HG0745120
HORVU_MOREX_r3_6HG0605890
HORVU_MOREX_r3_2HG0207980
HORVU_MOREX_r3_1HG0066190
HORVU_MOREX_r3_6HG0568570
HORVU_MOREX_r3_6HG0610180
HORVU_MOREX_r3_1HG0087190
HORVU_MOREX_r3_1HG0069260
HORVU_MOREX_r3_3HG0224540
HORVU_MOREX_r3_5HG0522100
HORVU_MOREX_r3_1HG0019330
HORVU_MOREX_r3_3HG0279280
HORVU_MOREX_r3_6HG0622470
HORVU_MOREX_r3_1HG0085870
HORVU_MOREX_r3_5HG0529140
HORVU_MOREX_r3_7HG0654450
HORVU_MOREX_r3_1HG0041630
novel.429
HORVU_MOREX_r3_2HG0196120
HORVU_MOREX_r3_6HG0629440
HORVU_MOREX_r3_2HG0202880
HORVU_MOREX_r3_4HG0372820
HORVU_MOREX_r3_3HG0258150
HORVU_MOREX_r3_7HG0709580
HORVU_MOREX_r3_1HG0002280
HORVU_MOREX_r3_7HG0636950
HORVU_MOREX_r3_7HG0684160
HORVU_MOREX_r3_5HG0523310
HORVU_MOREX_r3_1HG0022330
novel.7313
HORVU_MOREX_r3_5HG0534730
HORVU_MOREX_r3_3HG0268090
HORVU_MOREX_r3_6HG0627360
HORVU_MOREX_r3_3HG0233820
HORVU_MOREX_r3_6HG0622060
HORVU_MOREX_r3_2HG0167460
HORVU_MOREX_r3_7HG0651110
HORVU_MOREX_r3_2HG0136860
HORVU_MOREX_r3_3HG0230670
HORVU_MOREX_r3_2HG0208110
HORVU_MOREX_r3_5HG0523050
HORVU_MOREX_r3_4HG0381060
HORVU_MOREX_r3_2HG0156610
HORVU_MOREX_r3_7HG0666850
HORVU_MOREX_r3_5HG0538180
HORVU_MOREX_r3_2HG0110140
HORVU_MOREX_r3_6HG0617320
HORVU_MOREX_r3_7HG0739820
HORVU_MOREX_r3_7HG0651920
HORVU_MOREX_r3_5HG0440160
HORVU_MOREX_r3_1HG0071970
HORVU_MOREX_r3_1HG0093870
HORVU_MOREX_r3_4HG0390960
novel.7483
HORVU_MOREX_r3_5HG0488870
HORVU_MOREX_r3_5HG0519120
HORVU_MOREX_r3_5HG0429940
HORVU_MOREX_r3_5HG0476330
HORVU_MOREX_r3_2HG0202120
novel.7025
HORVU_MOREX_r3_6HG0553900
HORVU_MOREX_r3_3HG0306200
HORVU_MOREX_r3_3HG0301510
HORVU_MOREX_r3_6HG0617730
HORVU_MOREX_r3_4HG0331930
HORVU_MOREX_r3_2HG0168900
HORVU_MOREX_r3_5HG0499760
HORVU_MOREX_r3_5HG0473460
HORVU_MOREX_r3_5HG0499010
HORVU_MOREX_r3_4HG0378840
HORVU_MOREX_r3_7HG0660720
HORVU_MOREX_r3_7HG0661680
HORVU_MOREX_r3_1HG0089070
HORVU_MOREX_r3_2HG0196540
HORVU_MOREX_r3_5HG0500590
HORVU_MOREX_r3_7HG0706910
HORVU_MOREX_r3_3HG0307040
HORVU_MOREX_r3_3HG0301370
HORVU_MOREX_r3_2HG0138660
HORVU_MOREX_r3_3HG0285150
HORVU_MOREX_r3_1HG0021110
novel.110
HORVU_MOREX_r3_7HG0657700
HORVU_MOREX_r3_4HG0345610
HORVU_MOREX_r3_5HG0503550
HORVU_MOREX_r3_6HG0616340
HORVU_MOREX_r3_6HG0543150
HORVU_MOREX_r3_5HG0478580
HORVU_MOREX_r3_6HG0620260
HORVU_MOREX_r3_1HG0041580
HORVU_MOREX_r3_6HG0603290
HORVU_MOREX_r3_3HG0326090
HORVU_MOREX_r3_3HG0245890
HORVU_MOREX_r3_2HG0202810
HORVU_MOREX_r3_6HG0545380
HORVU_MOREX_r3_5HG0430240
HORVU_MOREX_r3_2HG0178020
HORVU_MOREX_r3_5HG0490490
HORVU_MOREX_r3_7HG0636130
HORVU_MOREX_r3_1HG0021350
HORVU_MOREX_r3_2HG0121800
HORVU_MOREX_r3_3HG0314290
HORVU_MOREX_r3_4HG0404850
HORVU_MOREX_r3_3HG0235930
HORVU_MOREX_r3_1HG0090140
HORVU_MOREX_r3_3HG0313020
HORVU_MOREX_r3_2HG0195450
HORVU_MOREX_r3_5HG0461290
HORVU_MOREX_r3_1HG0017760
HORVU_MOREX_r3_2HG0099170
HORVU_MOREX_r3_2HG0207170
HORVU_MOREX_r3_2HG0193790
HORVU_MOREX_r3_6HG0541150
HORVU_MOREX_r3_6HG0625810
HORVU_MOREX_r3_3HG0322130
HORVU_MOREX_r3_5HG0535960
HORVU_MOREX_r3_2HG0167390
HORVU_MOREX_r3_1HG0020850
HORVU_MOREX_r3_6HG0547570
HORVU_MOREX_r3_2HG0110850
HORVU_MOREX_r3_7HG0635560
HORVU_MOREX_r3_4HG0379700
HORVU_MOREX_r3_5HG0459290
HORVU_MOREX_r3_1HG0069130
HORVU_MOREX_r3_2HG0138980
HORVU_MOREX_r3_4HG0408930
HORVU_MOREX_r3_2HG0102650
HORVU_MOREX_r3_1HG0011900
HORVU_MOREX_r3_1HG0076590
novel.2731
HORVU_MOREX_r3_5HG0487950
HORVU_MOREX_r3_3HG0235860
HORVU_MOREX_r3_1HG0092570
HORVU_MOREX_r3_7HG0640090
HORVU_MOREX_r3_5HG0448780
HORVU_MOREX_r3_1HG0063210
HORVU_MOREX_r3_3HG0293940
HORVU_MOREX_r3_5HG0495030
HORVU_MOREX_r3_2HG0190290
HORVU_MOREX_r3_7HG0654020
novel.2581
HORVU_MOREX_r3_3HG0222330
HORVU_MOREX_r3_6HG0626000
HORVU_MOREX_r3_1HG0082040
HORVU_MOREX_r3_4HG0347380
HORVU_MOREX_r3_7HG0661630
HORVU_MOREX_r3_3HG0221130
HORVU_MOREX_r3_5HG0430940
novel.6569
novel.1854
HORVU_MOREX_r3_2HG0164110
HORVU_MOREX_r3_5HG0526460
HORVU_MOREX_r3_5HG0504500
HORVU_MOREX_r3_3HG0281730
HORVU_MOREX_r3_4HG0338100
HORVU_MOREX_r3_2HG0097700
HORVU_MOREX_r3_1HG0009360
HORVU_MOREX_r3_4HG0398650
HORVU_MOREX_r3_6HG0599450
HORVU_MOREX_r3_3HG0323750
HORVU_MOREX_r3_3HG0301800
HORVU_MOREX_r3_4HG0406470
novel.7049
HORVU_MOREX_r3_1HG0038590
HORVU_MOREX_r3_UnG0752990
HORVU_MOREX_r3_3HG0260930
HORVU_MOREX_r3_3HG0311650
HORVU_MOREX_r3_2HG0207790
HORVU_MOREX_r3_4HG0350710
HORVU_MOREX_r3_3HG0241380
HORVU_MOREX_r3_4HG0381750
HORVU_MOREX_r3_3HG0318380
HORVU_MOREX_r3_3HG0235640
HORVU_MOREX_r3_5HG0455240
HORVU_MOREX_r3_2HG0118080
HORVU_MOREX_r3_5HG0524470
HORVU_MOREX_r3_2HG0110720
HORVU_MOREX_r3_7HG0679100
HORVU_MOREX_r3_7HG0750970
HORVU_MOREX_r3_7HG0640990
HORVU_MOREX_r3_4HG0388400
HORVU_MOREX_r3_5HG0497680
HORVU_MOREX_r3_4HG0383900
HORVU_MOREX_r3_4HG0335160
HORVU_MOREX_r3_4HG0333350
HORVU_MOREX_r3_1HG0091340
HORVU_MOREX_r3_5HG0499140
HORVU_MOREX_r3_3HG0220030
HORVU_MOREX_r3_6HG0630710
HORVU_MOREX_r3_6HG0597010
HORVU_MOREX_r3_1HG0091820
HORVU_MOREX_r3_6HG0578570
HORVU_MOREX_r3_1HG0016480
HORVU_MOREX_r3_6HG0625770
HORVU_MOREX_r3_3HG0283100
novel.1476
HORVU_MOREX_r3_5HG0466140
HORVU_MOREX_r3_7HG0717840
HORVU_MOREX_r3_3HG0287060
HORVU_MOREX_r3_4HG0346610
HORVU_MOREX_r3_5HG0477610
HORVU_MOREX_r3_2HG0217510
HORVU_MOREX_r3_7HG0639560
novel.2999
HORVU_MOREX_r3_6HG0560710
HORVU_MOREX_r3_3HG0276840
HORVU_MOREX_r3_2HG0138840
HORVU_MOREX_r3_5HG0484620
HORVU_MOREX_r3_5HG0506470
HORVU_MOREX_r3_4HG0383630
HORVU_MOREX_r3_5HG0421130
HORVU_MOREX_r3_5HG0512600
HORVU_MOREX_r3_7HG0634720
HORVU_MOREX_r3_5HG0472880
HORVU_MOREX_r3_4HG0410090
novel.1305
HORVU_MOREX_r3_6HG0618690
HORVU_MOREX_r3_3HG0321330
HORVU_MOREX_r3_1HG0076120
HORVU_MOREX_r3_7HG0671360
HORVU_MOREX_r3_7HG0652090
HORVU_MOREX_r3_3HG0226060
HORVU_MOREX_r3_2HG0182810
HORVU_MOREX_r3_3HG0302620
HORVU_MOREX_r3_4HG0338850
HORVU_MOREX_r3_1HG0080620
HORVU_MOREX_r3_2HG0207700
HORVU_MOREX_r3_3HG0272030
HORVU_MOREX_r3_6HG0551530
HORVU_MOREX_r3_2HG0107940
HORVU_MOREX_r3_3HG0306040
HORVU_MOREX_r3_7HG0722940
HORVU_MOREX_r3_2HG0181700
HORVU_MOREX_r3_1HG0087450
HORVU_MOREX_r3_3HG0218320
HORVU_MOREX_r3_7HG0720010
HORVU_MOREX_r3_2HG0195540
HORVU_MOREX_r3_4HG0415550
novel.2886
novel.2357
HORVU_MOREX_r3_2HG0155570
HORVU_MOREX_r3_7HG0746090
HORVU_MOREX_r3_5HG0527960
HORVU_MOREX_r3_5HG0440850
HORVU_MOREX_r3_4HG0380790
HORVU_MOREX_r3_5HG0482390
HORVU_MOREX_r3_2HG0188320
HORVU_MOREX_r3_4HG0343990
HORVU_MOREX_r3_4HG0405370
HORVU_MOREX_r3_1HG0071650
HORVU_MOREX_r3_3HG0281270
HORVU_MOREX_r3_2HG0208660
novel.6533
HORVU_MOREX_r3_7HG0651530
HORVU_MOREX_r3_2HG0127360
novel.7056
HORVU_MOREX_r3_5HG0508080
HORVU_MOREX_r3_1HG0062940
HORVU_MOREX_r3_1HG0081480
HORVU_MOREX_r3_6HG0555230
novel.4781
HORVU_MOREX_r3_4HG0340780
HORVU_MOREX_r3_7HG0744130
HORVU_MOREX_r3_4HG0347400
HORVU_MOREX_r3_6HG0620720
HORVU_MOREX_r3_1HG0022760
HORVU_MOREX_r3_7HG0713820
HORVU_MOREX_r3_3HG0256150
HORVU_MOREX_r3_3HG0266020
HORVU_MOREX_r3_3HG0287580
HORVU_MOREX_r3_3HG0326170
HORVU_MOREX_r3_2HG0109070
HORVU_MOREX_r3_7HG0661640
novel.5492
HORVU_MOREX_r3_5HG0481800
HORVU_MOREX_r3_7HG0648220
HORVU_MOREX_r3_7HG0717180
HORVU_MOREX_r3_2HG0214640
HORVU_MOREX_r3_4HG0341160
HORVU_MOREX_r3_2HG0180680
HORVU_MOREX_r3_5HG0481720
HORVU_MOREX_r3_5HG0473560
HORVU_MOREX_r3_5HG0508440
HORVU_MOREX_r3_5HG0509820
HORVU_MOREX_r3_3HG0266310
HORVU_MOREX_r3_5HG0438400
HORVU_MOREX_r3_7HG0743270
HORVU_MOREX_r3_5HG0426510
HORVU_MOREX_r3_2HG0123850
HORVU_MOREX_r3_3HG0239980
HORVU_MOREX_r3_5HG0517040
HORVU_MOREX_r3_1HG0084390
HORVU_MOREX_r3_7HG0637470
HORVU_MOREX_r3_3HG0231090
HORVU_MOREX_r3_6HG0631700
novel.1578
HORVU_MOREX_r3_2HG0180240
HORVU_MOREX_r3_2HG0099140
HORVU_MOREX_r3_7HG0642610
HORVU_MOREX_r3_1HG0068970
HORVU_MOREX_r3_2HG0128410
HORVU_MOREX_r3_7HG0724480
HORVU_MOREX_r3_1HG0060040
HORVU_MOREX_r3_7HG0703490
HORVU_MOREX_r3_7HG0699680
HORVU_MOREX_r3_1HG0065860
HORVU_MOREX_r3_2HG0169880
HORVU_MOREX_r3_7HG0640720
HORVU_MOREX_r3_3HG0249790
HORVU_MOREX_r3_3HG0236240
HORVU_MOREX_r3_2HG0116700
HORVU_MOREX_r3_4HG0413270
HORVU_MOREX_r3_7HG0724370
HORVU_MOREX_r3_3HG0227780
HORVU_MOREX_r3_4HG0396220
HORVU_MOREX_r3_1HG0042320
HORVU_MOREX_r3_4HG0380710
HORVU_MOREX_r3_4HG0400000
HORVU_MOREX_r3_2HG0199660
HORVU_MOREX_r3_1HG0024210
HORVU_MOREX_r3_6HG0627480
HORVU_MOREX_r3_2HG0124450
HORVU_MOREX_r3_5HG0511490
HORVU_MOREX_r3_4HG0418620
HORVU_MOREX_r3_3HG0291310
HORVU_MOREX_r3_7HG0650300
HORVU_MOREX_r3_3HG0283520
HORVU_MOREX_r3_3HG0287730
HORVU_MOREX_r3_5HG0467030
HORVU_MOREX_r3_4HG0369960
HORVU_MOREX_r3_6HG0596780
HORVU_MOREX_r3_4HG0374560
HORVU_MOREX_r3_7HG0683800
HORVU_MOREX_r3_7HG0650960
HORVU_MOREX_r3_2HG0205400
HORVU_MOREX_r3_1HG0066620
HORVU_MOREX_r3_7HG0723280
HORVU_MOREX_r3_2HG0102910
HORVU_MOREX_r3_3HG0273390
HORVU_MOREX_r3_2HG0099060
HORVU_MOREX_r3_2HG0097540
HORVU_MOREX_r3_5HG0481790
HORVU_MOREX_r3_3HG0248960
novel.947
HORVU_MOREX_r3_2HG0100880
HORVU_MOREX_r3_4HG0338720
HORVU_MOREX_r3_2HG0111410
HORVU_MOREX_r3_3HG0300600
HORVU_MOREX_r3_7HG0735630
HORVU_MOREX_r3_7HG0673430
HORVU_MOREX_r3_4HG0338450
HORVU_MOREX_r3_2HG0207920
HORVU_MOREX_r3_2HG0208670
HORVU_MOREX_r3_1HG0066590
novel.4687
HORVU_MOREX_r3_3HG0245380
HORVU_MOREX_r3_3HG0311140
HORVU_MOREX_r3_6HG0627720
HORVU_MOREX_r3_6HG0545810
HORVU_MOREX_r3_6HG0541040
HORVU_MOREX_r3_3HG0302050
HORVU_MOREX_r3_7HG0636780
HORVU_MOREX_r3_3HG0319360
HORVU_MOREX_r3_3HG0219300
HORVU_MOREX_r3_3HG0320310
HORVU_MOREX_r3_2HG0190660
HORVU_MOREX_r3_5HG0484810
HORVU_MOREX_r3_4HG0346120
HORVU_MOREX_r3_6HG0550480
HORVU_MOREX_r3_2HG0122470
novel.5142
HORVU_MOREX_r3_5HG0533260
HORVU_MOREX_r3_3HG0280400
HORVU_MOREX_r3_4HG0395410
HORVU_MOREX_r3_2HG0153790
HORVU_MOREX_r3_4HG0339740
HORVU_MOREX_r3_3HG0320050
HORVU_MOREX_r3_3HG0284330
HORVU_MOREX_r3_4HG0412120
novel.5169
HORVU_MOREX_r3_3HG0221240
HORVU_MOREX_r3_6HG0599100
HORVU_MOREX_r3_2HG0185890
novel.2730
HORVU_MOREX_r3_3HG0299830
HORVU_MOREX_r3_7HG0701300
HORVU_MOREX_r3_7HG0736350
HORVU_MOREX_r3_4HG0411310
HORVU_MOREX_r3_7HG0689320
HORVU_MOREX_r3_6HG0620190
novel.4634
HORVU_MOREX_r3_5HG0516720
HORVU_MOREX_r3_3HG0225310
HORVU_MOREX_r3_1HG0065610
HORVU_MOREX_r3_1HG0043570
HORVU_MOREX_r3_4HG0391110
HORVU_MOREX_r3_2HG0096540
HORVU_MOREX_r3_3HG0281310
HORVU_MOREX_r3_7HG0673050
HORVU_MOREX_r3_3HG0294830
HORVU_MOREX_r3_1HG0053190
HORVU_MOREX_r3_1HG0090370
HORVU_MOREX_r3_2HG0198030
HORVU_MOREX_r3_3HG0299150
novel.60
HORVU_MOREX_r3_3HG0302100
novel.5747
HORVU_MOREX_r3_5HG0494900
novel.2374
HORVU_MOREX_r3_5HG0473580
novel.3873
HORVU_MOREX_r3_2HG0184930
HORVU_MOREX_r3_6HG0572880
HORVU_MOREX_r3_2HG0104870
HORVU_MOREX_r3_5HG0523090
HORVU_MOREX_r3_3HG0319100
HORVU_MOREX_r3_7HG0712330
HORVU_MOREX_r3_1HG0094940
HORVU_MOREX_r3_6HG0564580
HORVU_MOREX_r3_6HG0599760
HORVU_MOREX_r3_2HG0172180
HORVU_MOREX_r3_2HG0132360
HORVU_MOREX_r3_7HG0651390
HORVU_MOREX_r3_4HG0410620
HORVU_MOREX_r3_5HG0512430
HORVU_MOREX_r3_7HG0689170
HORVU_MOREX_r3_5HG0492640
HORVU_MOREX_r3_1HG0074710
novel.263
novel.3396
HORVU_MOREX_r3_4HG0396540
HORVU_MOREX_r3_4HG0331910
HORVU_MOREX_r3_5HG0455760
HORVU_MOREX_r3_3HG0220760
HORVU_MOREX_r3_3HG0281180
HORVU_MOREX_r3_3HG0326190
HORVU_MOREX_r3_2HG0213970
HORVU_MOREX_r3_1HG0090740
HORVU_MOREX_r3_5HG0487060
HORVU_MOREX_r3_3HG0327080
HORVU_MOREX_r3_2HG0128490
HORVU_MOREX_r3_5HG0424470
HORVU_MOREX_r3_3HG0281780
novel.3097
HORVU_MOREX_r3_6HG0540200
HORVU_MOREX_r3_6HG0545860
HORVU_MOREX_r3_1HG0042420
HORVU_MOREX_r3_4HG0399700
HORVU_MOREX_r3_6HG0556100
HORVU_MOREX_r3_6HG0556530
HORVU_MOREX_r3_5HG0430620
HORVU_MOREX_r3_7HG0636060
HORVU_MOREX_r3_3HG0278790
HORVU_MOREX_r3_7HG0670830
HORVU_MOREX_r3_1HG0067420
HORVU_MOREX_r3_3HG0291840
HORVU_MOREX_r3_5HG0514220
HORVU_MOREX_r3_7HG0729520
HORVU_MOREX_r3_4HG0408940
HORVU_MOREX_r3_4HG0383400
novel.278
HORVU_MOREX_r3_1HG0053960
HORVU_MOREX_r3_3HG0235480
HORVU_MOREX_r3_1HG0062840
HORVU_MOREX_r3_7HG0667880
HORVU_MOREX_r3_4HG0338040
HORVU_MOREX_r3_2HG0108940
HORVU_MOREX_r3_1HG0062330
HORVU_MOREX_r3_1HG0060630
HORVU_MOREX_r3_1HG0029480
HORVU_MOREX_r3_6HG0618740
HORVU_MOREX_r3_7HG0669230
HORVU_MOREX_r3_7HG0663990
HORVU_MOREX_r3_1HG0092200
HORVU_MOREX_r3_7HG0722670
HORVU_MOREX_r3_5HG0449530
HORVU_MOREX_r3_5HG0499880
HORVU_MOREX_r3_1HG0083520
HORVU_MOREX_r3_3HG0260400
HORVU_MOREX_r3_1HG0080750
HORVU_MOREX_r3_5HG0429420
HORVU_MOREX_r3_7HG0650260
HORVU_MOREX_r3_6HG0572590
novel.5678
HORVU_MOREX_r3_4HG0344120
HORVU_MOREX_r3_3HG0230290
HORVU_MOREX_r3_1HG0057750
HORVU_MOREX_r3_3HG0303380
HORVU_MOREX_r3_3HG0251900
HORVU_MOREX_r3_2HG0167350
HORVU_MOREX_r3_3HG0325820
HORVU_MOREX_r3_2HG0172080
HORVU_MOREX_r3_7HG0658260
HORVU_MOREX_r3_6HG0625730
HORVU_MOREX_r3_7HG0727370
novel.7513
HORVU_MOREX_r3_6HG0547700
HORVU_MOREX_r3_1HG0046400
HORVU_MOREX_r3_2HG0099130
HORVU_MOREX_r3_7HG0656570
novel.4696
novel.2355
HORVU_MOREX_r3_5HG0431720
HORVU_MOREX_r3_6HG0605120
HORVU_MOREX_r3_6HG0564480
HORVU_MOREX_r3_4HG0339290
HORVU_MOREX_r3_6HG0571070
HORVU_MOREX_r3_2HG0107590
HORVU_MOREX_r3_2HG0109700
HORVU_MOREX_r3_7HG0740150
HORVU_MOREX_r3_3HG0240580
HORVU_MOREX_r3_2HG0196950
HORVU_MOREX_r3_5HG0423130
HORVU_MOREX_r3_3HG0288800
HORVU_MOREX_r3_3HG0224520
HORVU_MOREX_r3_3HG0243960
HORVU_MOREX_r3_3HG0267610
HORVU_MOREX_r3_2HG0179650
HORVU_MOREX_r3_1HG0061920
HORVU_MOREX_r3_1HG0051890
HORVU_MOREX_r3_7HG0671510
HORVU_MOREX_r3_3HG0222130
HORVU_MOREX_r3_7HG0651400
HORVU_MOREX_r3_5HG0487980
HORVU_MOREX_r3_5HG0460160
HORVU_MOREX_r3_5HG0471980
novel.5318
novel.924
HORVU_MOREX_r3_3HG0284890
HORVU_MOREX_r3_4HG0410700
HORVU_MOREX_r3_5HG0509930
HORVU_MOREX_r3_5HG0493910
HORVU_MOREX_r3_1HG0067580
HORVU_MOREX_r3_2HG0170810
HORVU_MOREX_r3_7HG0666830
novel.6257
HORVU_MOREX_r3_3HG0305540
HORVU_MOREX_r3_7HG0728260
HORVU_MOREX_r3_3HG0296090
HORVU_MOREX_r3_1HG0074140
HORVU_MOREX_r3_4HG0404710
HORVU_MOREX_r3_3HG0220260
HORVU_MOREX_r3_4HG0331720
HORVU_MOREX_r3_5HG0490430
novel.2720
HORVU_MOREX_r3_7HG0752040
HORVU_MOREX_r3_5HG0533960
HORVU_MOREX_r3_4HG0345740
HORVU_MOREX_r3_3HG0281260
HORVU_MOREX_r3_4HG0348850
HORVU_MOREX_r3_2HG0211700
HORVU_MOREX_r3_6HG0631900
HORVU_MOREX_r3_7HG0668550
HORVU_MOREX_r3_4HG0391330
HORVU_MOREX_r3_6HG0597350
HORVU_MOREX_r3_7HG0746120
HORVU_MOREX_r3_2HG0189970
HORVU_MOREX_r3_3HG0323770
HORVU_MOREX_r3_6HG0546930
HORVU_MOREX_r3_7HG0673000
HORVU_MOREX_r3_5HG0420320
HORVU_MOREX_r3_5HG0526320
HORVU_MOREX_r3_5HG0456460
HORVU_MOREX_r3_7HG0743470
HORVU_MOREX_r3_6HG0633520
HORVU_MOREX_r3_6HG0632780
HORVU_MOREX_r3_4HG0384440
HORVU_MOREX_r3_6HG0622430
HORVU_MOREX_r3_2HG0113210
HORVU_MOREX_r3_2HG0203310
HORVU_MOREX_r3_3HG0315590
HORVU_MOREX_r3_3HG0310540
HORVU_MOREX_r3_2HG0134530
novel.1075
HORVU_MOREX_r3_2HG0196990
HORVU_MOREX_r3_1HG0056780
HORVU_MOREX_r3_3HG0246400
HORVU_MOREX_r3_7HG0682170
HORVU_MOREX_r3_3HG0318820
HORVU_MOREX_r3_2HG0191440
HORVU_MOREX_r3_6HG0631680
HORVU_MOREX_r3_5HG0424590
HORVU_MOREX_r3_6HG0623070
HORVU_MOREX_r3_7HG0723420
HORVU_MOREX_r3_3HG0231290
HORVU_MOREX_r3_3HG0282860
HORVU_MOREX_r3_6HG0574290
HORVU_MOREX_r3_1HG0025840
HORVU_MOREX_r3_3HG0302080
HORVU_MOREX_r3_3HG0312690
HORVU_MOREX_r3_7HG0669150
HORVU_MOREX_r3_7HG0729290
HORVU_MOREX_r3_4HG0400780
HORVU_MOREX_r3_7HG0677480
novel.6489
HORVU_MOREX_r3_1HG0089600
HORVU_MOREX_r3_7HG0634320
HORVU_MOREX_r3_6HG0575710
HORVU_MOREX_r3_7HG0664810
HORVU_MOREX_r3_7HG0687560
HORVU_MOREX_r3_3HG0318130
HORVU_MOREX_r3_4HG0397610
HORVU_MOREX_r3_7HG0728250
HORVU_MOREX_r3_3HG0235600
HORVU_MOREX_r3_7HG0636000
HORVU_MOREX_r3_7HG0650330
HORVU_MOREX_r3_3HG0235630
novel.1634
HORVU_MOREX_r3_5HG0519710
HORVU_MOREX_r3_2HG0114570
HORVU_MOREX_r3_3HG0258530
HORVU_MOREX_r3_5HG0430550
HORVU_MOREX_r3_4HG0399210
HORVU_MOREX_r3_2HG0136480
HORVU_MOREX_r3_3HG0282210
HORVU_MOREX_r3_6HG0577860
HORVU_MOREX_r3_2HG0097510
HORVU_MOREX_r3_2HG0154110
novel.5245
HORVU_MOREX_r3_4HG0404170
HORVU_MOREX_r3_7HG0751030
HORVU_MOREX_r3_3HG0235360
HORVU_MOREX_r3_2HG0106870
HORVU_MOREX_r3_2HG0111500
HORVU_MOREX_r3_2HG0114320
HORVU_MOREX_r3_6HG0543610
HORVU_MOREX_r3_1HG0021010
HORVU_MOREX_r3_1HG0076630
HORVU_MOREX_r3_7HG0653740
HORVU_MOREX_r3_7HG0709950
HORVU_MOREX_r3_3HG0287400
HORVU_MOREX_r3_3HG0240070
HORVU_MOREX_r3_6HG0633990
HORVU_MOREX_r3_3HG0294260
HORVU_MOREX_r3_6HG0559390
novel.4630
HORVU_MOREX_r3_1HG0069170
HORVU_MOREX_r3_1HG0064740
HORVU_MOREX_r3_7HG0643280
novel.3184
HORVU_MOREX_r3_3HG0296330
HORVU_MOREX_r3_7HG0643530
HORVU_MOREX_r3_5HG0438750
novel.387
novel.5526
HORVU_MOREX_r3_2HG0131780
HORVU_MOREX_r3_1HG0032930
HORVU_MOREX_r3_3HG0303210
HORVU_MOREX_r3_2HG0208720
HORVU_MOREX_r3_2HG0201340
novel.7211
HORVU_MOREX_r3_5HG0460570
HORVU_MOREX_r3_5HG0420850
HORVU_MOREX_r3_4HG0353070
HORVU_MOREX_r3_6HG0574310
HORVU_MOREX_r3_2HG0097560
HORVU_MOREX_r3_2HG0174350
novel.4580
HORVU_MOREX_r3_3HG0292700
HORVU_MOREX_r3_6HG0586400
HORVU_MOREX_r3_1HG0086720
HORVU_MOREX_r3_2HG0172010
HORVU_MOREX_r3_7HG0735210
novel.3036
HORVU_MOREX_r3_2HG0177300
HORVU_MOREX_r3_3HG0310500
HORVU_MOREX_r3_7HG0640710
HORVU_MOREX_r3_7HG0748630
HORVU_MOREX_r3_6HG0631710
HORVU_MOREX_r3_1HG0083580
HORVU_MOREX_r3_4HG0387870
HORVU_MOREX_r3_7HG0643210
HORVU_MOREX_r3_3HG0226380
HORVU_MOREX_r3_7HG0663070
HORVU_MOREX_r3_7HG0733550
HORVU_MOREX_r3_2HG0118440
HORVU_MOREX_r3_6HG0569780
HORVU_MOREX_r3_3HG0294620
HORVU_MOREX_r3_7HG0714180
HORVU_MOREX_r3_7HG0642910
HORVU_MOREX_r3_1HG0075990
HORVU_MOREX_r3_7HG0748270
HORVU_MOREX_r3_7HG0718040
HORVU_MOREX_r3_6HG0605150
HORVU_MOREX_r3_1HG0039860
HORVU_MOREX_r3_4HG0412340
HORVU_MOREX_r3_6HG0602880
HORVU_MOREX_r3_2HG0119330
HORVU_MOREX_r3_5HG0467900
HORVU_MOREX_r3_6HG0570020
HORVU_MOREX_r3_1HG0093200
HORVU_MOREX_r3_7HG0706310
HORVU_MOREX_r3_4HG0399620
HORVU_MOREX_r3_7HG0746410
HORVU_MOREX_r3_4HG0382760
HORVU_MOREX_r3_7HG0719560
HORVU_MOREX_r3_6HG0600710
HORVU_MOREX_r3_5HG0437490
HORVU_MOREX_r3_7HG0665640
HORVU_MOREX_r3_2HG0198470
HORVU_MOREX_r3_1HG0082820
HORVU_MOREX_r3_3HG0231780
HORVU_MOREX_r3_7HG0736180
HORVU_MOREX_r3_4HG0393050
HORVU_MOREX_r3_3HG0270500
HORVU_MOREX_r3_4HG0379260
HORVU_MOREX_r3_2HG0197340
HORVU_MOREX_r3_3HG0247440
HORVU_MOREX_r3_5HG0495910
HORVU_MOREX_r3_2HG0112610
HORVU_MOREX_r3_7HG0710080
HORVU_MOREX_r3_6HG0628880
HORVU_MOREX_r3_2HG0191120
HORVU_MOREX_r3_6HG0593300
HORVU_MOREX_r3_4HG0342080
HORVU_MOREX_r3_2HG0100580
HORVU_MOREX_r3_2HG0110530
HORVU_MOREX_r3_2HG0180820
HORVU_MOREX_r3_3HG0312240
HORVU_MOREX_r3_4HG0398060
HORVU_MOREX_r3_6HG0608490
HORVU_MOREX_r3_1HG0079930
HORVU_MOREX_r3_1HG0018110
HORVU_MOREX_r3_5HG0526600
HORVU_MOREX_r3_5HG0430760
HORVU_MOREX_r3_5HG0498460
HORVU_MOREX_r3_7HG0719480
HORVU_MOREX_r3_1HG0044290
HORVU_MOREX_r3_3HG0226170
HORVU_MOREX_r3_1HG0049870
novel.4158
HORVU_MOREX_r3_3HG0298090
HORVU_MOREX_r3_7HG0721610
HORVU_MOREX_r3_6HG0559070
HORVU_MOREX_r3_3HG0317820
HORVU_MOREX_r3_7HG0747610
HORVU_MOREX_r3_2HG0099640
HORVU_MOREX_r3_6HG0592790
HORVU_MOREX_r3_3HG0283600
novel.1467
HORVU_MOREX_r3_4HG0407670
novel.3620
HORVU_MOREX_r3_4HG0383510
HORVU_MOREX_r3_6HG0613370
HORVU_MOREX_r3_6HG0611630
HORVU_MOREX_r3_1HG0023640
HORVU_MOREX_r3_7HG0750700
HORVU_MOREX_r3_5HG0462450
HORVU_MOREX_r3_5HG0517940
HORVU_MOREX_r3_6HG0611610
HORVU_MOREX_r3_7HG0642210
HORVU_MOREX_r3_6HG0632520
HORVU_MOREX_r3_7HG0713760
HORVU_MOREX_r3_3HG0241360
HORVU_MOREX_r3_2HG0122530
HORVU_MOREX_r3_1HG0044070
HORVU_MOREX_r3_5HG0460130
HORVU_MOREX_r3_4HG0395160
HORVU_MOREX_r3_3HG0221340
HORVU_MOREX_r3_7HG0702200
HORVU_MOREX_r3_1HG0027890
HORVU_MOREX_r3_2HG0164770
HORVU_MOREX_r3_1HG0000630
HORVU_MOREX_r3_2HG0114930
HORVU_MOREX_r3_5HG0488860
HORVU_MOREX_r3_5HG0420310
HORVU_MOREX_r3_1HG0020260
HORVU_MOREX_r3_5HG0474720
HORVU_MOREX_r3_2HG0198490
novel.1442
HORVU_MOREX_r3_3HG0221310
HORVU_MOREX_r3_3HG0272690
HORVU_MOREX_r3_5HG0491250
HORVU_MOREX_r3_3HG0285660
HORVU_MOREX_r3_6HG0613450
HORVU_MOREX_r3_3HG0235250
HORVU_MOREX_r3_4HG0384700
HORVU_MOREX_r3_5HG0513560
HORVU_MOREX_r3_3HG0230430
HORVU_MOREX_r3_3HG0286330
HORVU_MOREX_r3_6HG0618720
HORVU_MOREX_r3_4HG0381110
HORVU_MOREX_r3_4HG0331360
HORVU_MOREX_r3_4HG0342800
HORVU_MOREX_r3_6HG0616730
HORVU_MOREX_r3_5HG0486060
HORVU_MOREX_r3_5HG0511140
HORVU_MOREX_r3_2HG0152610
HORVU_MOREX_r3_5HG0520390
HORVU_MOREX_r3_2HG0193650
HORVU_MOREX_r3_5HG0520130
HORVU_MOREX_r3_5HG0510240
HORVU_MOREX_r3_5HG0501470
HORVU_MOREX_r3_5HG0512710
HORVU_MOREX_r3_4HG0396130
HORVU_MOREX_r3_5HG0469700
HORVU_MOREX_r3_2HG0208520
novel.2753
HORVU_MOREX_r3_5HG0429230
HORVU_MOREX_r3_2HG0102660
HORVU_MOREX_r3_1HG0075430
HORVU_MOREX_r3_4HG0340710
novel.2719
HORVU_MOREX_r3_4HG0390620
HORVU_MOREX_r3_1HG0015520
HORVU_MOREX_r3_1HG0016450
novel.6629
HORVU_MOREX_r3_2HG0183350
HORVU_MOREX_r3_2HG0099840
novel.5351
HORVU_MOREX_r3_3HG0302230
HORVU_MOREX_r3_5HG0469800
HORVU_MOREX_r3_2HG0138810
HORVU_MOREX_r3_1HG0064030
HORVU_MOREX_r3_4HG0344940
HORVU_MOREX_r3_2HG0172400
HORVU_MOREX_r3_3HG0257460
HORVU_MOREX_r3_3HG0315000
HORVU_MOREX_r3_4HG0353220
HORVU_MOREX_r3_7HG0690780
HORVU_MOREX_r3_3HG0331080
HORVU_MOREX_r3_4HG0411240
HORVU_MOREX_r3_1HG0092560
HORVU_MOREX_r3_5HG0437170
HORVU_MOREX_r3_3HG0297180
HORVU_MOREX_r3_5HG0461160
HORVU_MOREX_r3_3HG0319390
HORVU_MOREX_r3_3HG0243170
novel.3597
HORVU_MOREX_r3_2HG0140950
HORVU_MOREX_r3_7HG0661890
HORVU_MOREX_r3_1HG0056490
HORVU_MOREX_r3_2HG0132990
HORVU_MOREX_r3_7HG0715130
HORVU_MOREX_r3_2HG0183860
HORVU_MOREX_r3_4HG0403480
HORVU_MOREX_r3_7HG0712650
novel.4758
HORVU_MOREX_r3_3HG0244980
HORVU_MOREX_r3_3HG0228430
novel.6374
HORVU_MOREX_r3_1HG0091990
HORVU_MOREX_r3_1HG0062770
HORVU_MOREX_r3_4HG0388840
HORVU_MOREX_r3_2HG0165370
HORVU_MOREX_r3_6HG0582560
HORVU_MOREX_r3_5HG0468700
HORVU_MOREX_r3_1HG0079800
HORVU_MOREX_r3_2HG0118230
HORVU_MOREX_r3_4HG0403800
HORVU_MOREX_r3_6HG0545990
HORVU_MOREX_r3_4HG0395010
HORVU_MOREX_r3_5HG0454500
HORVU_MOREX_r3_6HG0545930
novel.6144
HORVU_MOREX_r3_1HG0079910
HORVU_MOREX_r3_1HG0060080
HORVU_MOREX_r3_7HG0733490
HORVU_MOREX_r3_6HG0569090
novel.63
HORVU_MOREX_r3_6HG0605810
HORVU_MOREX_r3_2HG0117530
HORVU_MOREX_r3_1HG0057350
HORVU_MOREX_r3_5HG0430390
HORVU_MOREX_r3_6HG0606230
novel.6491
HORVU_MOREX_r3_7HG0735510
HORVU_MOREX_r3_1HG0000950
HORVU_MOREX_r3_2HG0115380
HORVU_MOREX_r3_3HG0281000
HORVU_MOREX_r3_3HG0274180
HORVU_MOREX_r3_2HG0105350
HORVU_MOREX_r3_4HG0394130
HORVU_MOREX_r3_1HG0051750
HORVU_MOREX_r3_6HG0542140
HORVU_MOREX_r3_6HG0575410
HORVU_MOREX_r3_5HG0467230
HORVU_MOREX_r3_7HG0675580
HORVU_MOREX_r3_7HG0675090
HORVU_MOREX_r3_3HG0317910
HORVU_MOREX_r3_5HG0457050
HORVU_MOREX_r3_3HG0241900
HORVU_MOREX_r3_2HG0139070
HORVU_MOREX_r3_4HG0397300
HORVU_MOREX_r3_2HG0100980
HORVU_MOREX_r3_2HG0203170
HORVU_MOREX_r3_7HG0669120
HORVU_MOREX_r3_1HG0094110
HORVU_MOREX_r3_2HG0208970
HORVU_MOREX_r3_2HG0099970
HORVU_MOREX_r3_4HG0344990
HORVU_MOREX_r3_7HG0739910
HORVU_MOREX_r3_3HG0308590
HORVU_MOREX_r3_1HG0067200
HORVU_MOREX_r3_7HG0703450
HORVU_MOREX_r3_7HG0730330
novel.4691
HORVU_MOREX_r3_1HG0005790
novel.6101
HORVU_MOREX_r3_6HG0576290
HORVU_MOREX_r3_6HG0634140
HORVU_MOREX_r3_6HG0599800
HORVU_MOREX_r3_6HG0617940
HORVU_MOREX_r3_4HG0411300
HORVU_MOREX_r3_6HG0612530
HORVU_MOREX_r3_1HG0090970
HORVU_MOREX_r3_1HG0073480
HORVU_MOREX_r3_6HG0558250
HORVU_MOREX_r3_2HG0197200
HORVU_MOREX_r3_3HG0249860
HORVU_MOREX_r3_5HG0471130
HORVU_MOREX_r3_1HG0089010
HORVU_MOREX_r3_2HG0193820
HORVU_MOREX_r3_2HG0185210
HORVU_MOREX_r3_1HG0069030
novel.6682
HORVU_MOREX_r3_1HG0080940
HORVU_MOREX_r3_6HG0629260
HORVU_MOREX_r3_2HG0158070
HORVU_MOREX_r3_1HG0026940
HORVU_MOREX_r3_2HG0169540
HORVU_MOREX_r3_6HG0630620
HORVU_MOREX_r3_5HG0484660
HORVU_MOREX_r3_7HG0645900
HORVU_MOREX_r3_7HG0685490
HORVU_MOREX_r3_7HG0685350
HORVU_MOREX_r3_6HG0605480
HORVU_MOREX_r3_6HG0604200
HORVU_MOREX_r3_2HG0185880
HORVU_MOREX_r3_1HG0001020
HORVU_MOREX_r3_3HG0224760
HORVU_MOREX_r3_2HG0184990
HORVU_MOREX_r3_3HG0320030
HORVU_MOREX_r3_5HG0481030
novel.6304
HORVU_MOREX_r3_1HG0068790
HORVU_MOREX_r3_7HG0713940
novel.6840
HORVU_MOREX_r3_1HG0083550
novel.2898
HORVU_MOREX_r3_1HG0085380
HORVU_MOREX_r3_5HG0519920
HORVU_MOREX_r3_7HG0752360
HORVU_MOREX_r3_1HG0085840
HORVU_MOREX_r3_3HG0220800
HORVU_MOREX_r3_1HG0038900
HORVU_MOREX_r3_2HG0185380
HORVU_MOREX_r3_6HG0612700
HORVU_MOREX_r3_7HG0647190
HORVU_MOREX_r3_7HG0635300
HORVU_MOREX_r3_6HG0630790
HORVU_MOREX_r3_2HG0168060
HORVU_MOREX_r3_3HG0328430
HORVU_MOREX_r3_3HG0256910
HORVU_MOREX_r3_4HG0333220
HORVU_MOREX_r3_3HG0297620
HORVU_MOREX_r3_3HG0226230
HORVU_MOREX_r3_7HG0639360
HORVU_MOREX_r3_6HG0549330
novel.1337
HORVU_MOREX_r3_2HG0195690
HORVU_MOREX_r3_5HG0441110
novel.5302
HORVU_MOREX_r3_5HG0504090
HORVU_MOREX_r3_7HG0634400
HORVU_MOREX_r3_5HG0494680
HORVU_MOREX_r3_4HG0359060
HORVU_MOREX_r3_3HG0269000
HORVU_MOREX_r3_2HG0111480
HORVU_MOREX_r3_4HG0412490
HORVU_MOREX_r3_6HG0561170
novel.7300
HORVU_MOREX_r3_6HG0541410
HORVU_MOREX_r3_5HG0488970
HORVU_MOREX_r3_3HG0306700
HORVU_MOREX_r3_6HG0546340
HORVU_MOREX_r3_5HG0536500
HORVU_MOREX_r3_3HG0282690
HORVU_MOREX_r3_5HG0526430
HORVU_MOREX_r3_3HG0220060
HORVU_MOREX_r3_3HG0264800
HORVU_MOREX_r3_4HG0355590
HORVU_MOREX_r3_6HG0632800
HORVU_MOREX_r3_5HG0430200
HORVU_MOREX_r3_3HG0318610
HORVU_MOREX_r3_2HG0201190
HORVU_MOREX_r3_4HG0413520
HORVU_MOREX_r3_4HG0342730
HORVU_MOREX_r3_2HG0173090
HORVU_MOREX_r3_7HG0676250
HORVU_MOREX_r3_3HG0267770
HORVU_MOREX_r3_4HG0393750
HORVU_MOREX_r3_3HG0306420
HORVU_MOREX_r3_3HG0246590
HORVU_MOREX_r3_5HG0508840
HORVU_MOREX_r3_2HG0193160
HORVU_MOREX_r3_2HG0193060
HORVU_MOREX_r3_7HG0698570
HORVU_MOREX_r3_5HG0527720
HORVU_MOREX_r3_7HG0692500
HORVU_MOREX_r3_7HG0682090
HORVU_MOREX_r3_6HG0546330
HORVU_MOREX_r3_1HG0055720
HORVU_MOREX_r3_7HG0706260
HORVU_MOREX_r3_4HG0380330
HORVU_MOREX_r3_4HG0338860
HORVU_MOREX_r3_7HG0656530
HORVU_MOREX_r3_1HG0057810
HORVU_MOREX_r3_7HG0733700
HORVU_MOREX_r3_4HG0331460
HORVU_MOREX_r3_2HG0163220
HORVU_MOREX_r3_2HG0190800
HORVU_MOREX_r3_2HG0124680
HORVU_MOREX_r3_5HG0515890
HORVU_MOREX_r3_7HG0724530
HORVU_MOREX_r3_3HG0240190
novel.2171
HORVU_MOREX_r3_3HG0220180
HORVU_MOREX_r3_7HG0670350
HORVU_MOREX_r3_3HG0327690
HORVU_MOREX_r3_2HG0186150
HORVU_MOREX_r3_4HG0349950
HORVU_MOREX_r3_7HG0716830
HORVU_MOREX_r3_3HG0302910
HORVU_MOREX_r3_5HG0495490
HORVU_MOREX_r3_5HG0519480
novel.2132
HORVU_MOREX_r3_6HG0613040
HORVU_MOREX_r3_5HG0448080
HORVU_MOREX_r3_4HG0349400
HORVU_MOREX_r3_3HG0297740
HORVU_MOREX_r3_2HG0180450
HORVU_MOREX_r3_4HG0391400
HORVU_MOREX_r3_4HG0346190
HORVU_MOREX_r3_5HG0493090
HORVU_MOREX_r3_4HG0409510
HORVU_MOREX_r3_5HG0443920
HORVU_MOREX_r3_1HG0064970
HORVU_MOREX_r3_2HG0136120
HORVU_MOREX_r3_4HG0338590
HORVU_MOREX_r3_4HG0381320
HORVU_MOREX_r3_1HG0072150
HORVU_MOREX_r3_1HG0057980
novel.6666
HORVU_MOREX_r3_3HG0225960
HORVU_MOREX_r3_5HG0520090
novel.1447
HORVU_MOREX_r3_5HG0502680
HORVU_MOREX_r3_4HG0391440
HORVU_MOREX_r3_6HG0546140
novel.474
HORVU_MOREX_r3_5HG0494860
HORVU_MOREX_r3_3HG0233710
HORVU_MOREX_r3_6HG0597130
HORVU_MOREX_r3_4HG0336180
HORVU_MOREX_r3_6HG0607410
HORVU_MOREX_r3_1HG0054160
HORVU_MOREX_r3_5HG0512370
HORVU_MOREX_r3_3HG0244970
HORVU_MOREX_r3_6HG0565450
HORVU_MOREX_r3_6HG0606010
HORVU_MOREX_r3_3HG0285830
HORVU_MOREX_r3_6HG0543140
HORVU_MOREX_r3_5HG0426060
HORVU_MOREX_r3_6HG0550890
HORVU_MOREX_r3_1HG0051870
HORVU_MOREX_r3_7HG0642600
HORVU_MOREX_r3_5HG0515020
HORVU_MOREX_r3_2HG0189960
HORVU_MOREX_r3_3HG0275450
HORVU_MOREX_r3_7HG0660730
HORVU_MOREX_r3_7HG0721200
HORVU_MOREX_r3_3HG0296450
HORVU_MOREX_r3_5HG0440150

## Sheet: YC83-PEG_vs_YC83-CK_Up
HORVU_MOREX_r3_3HG0302180
HORVU_MOREX_r3_2HG0194770
HORVU_MOREX_r3_1HG0073500
HORVU_MOREX_r3_2HG0127260
HORVU_MOREX_r3_6HG0540480
HORVU_MOREX_r3_6HG0540930
novel.4080
HORVU_MOREX_r3_7HG0667240
HORVU_MOREX_r3_7HG0659410
HORVU_MOREX_r3_5HG0490330
HORVU_MOREX_r3_6HG0538340
HORVU_MOREX_r3_3HG0330120
HORVU_MOREX_r3_5HG0527260
novel.4342
HORVU_MOREX_r3_2HG0106350
HORVU_MOREX_r3_3HG0230380
HORVU_MOREX_r3_5HG0440000
HORVU_MOREX_r3_5HG0439960
HORVU_MOREX_r3_4HG0347570
HORVU_MOREX_r3_3HG0329930
HORVU_MOREX_r3_7HG0740200
HORVU_MOREX_r3_7HG0641780
HORVU_MOREX_r3_6HG0564530
HORVU_MOREX_r3_1HG0061390
HORVU_MOREX_r3_7HG0675850
HORVU_MOREX_r3_4HG0349800
HORVU_MOREX_r3_4HG0345560
HORVU_MOREX_r3_3HG0284740
HORVU_MOREX_r3_2HG0167300
HORVU_MOREX_r3_2HG0195190
HORVU_MOREX_r3_4HG0386070
HORVU_MOREX_r3_2HG0206500
HORVU_MOREX_r3_2HG0159010
HORVU_MOREX_r3_7HG0641840
HORVU_MOREX_r3_4HG0388460
HORVU_MOREX_r3_7HG0749950
HORVU_MOREX_r3_5HG0510530
HORVU_MOREX_r3_5HG0522480
HORVU_MOREX_r3_5HG0498200
HORVU_MOREX_r3_6HG0540900
HORVU_MOREX_r3_2HG0195550
HORVU_MOREX_r3_2HG0207030
HORVU_MOREX_r3_7HG0639980
HORVU_MOREX_r3_6HG0542030
HORVU_MOREX_r3_5HG0520010
HORVU_MOREX_r3_5HG0522630
HORVU_MOREX_r3_2HG0158950
HORVU_MOREX_r3_5HG0500800
HORVU_MOREX_r3_4HG0346860
HORVU_MOREX_r3_7HG0644480
HORVU_MOREX_r3_1HG0050440
HORVU_MOREX_r3_4HG0380410
HORVU_MOREX_r3_1HG0031380
novel.1277
HORVU_MOREX_r3_2HG0206860
novel.4068
HORVU_MOREX_r3_5HG0430490
HORVU_MOREX_r3_2HG0135690
HORVU_MOREX_r3_6HG0623140
HORVU_MOREX_r3_4HG0348040
novel.3066
HORVU_MOREX_r3_1HG0077390
HORVU_MOREX_r3_4HG0397090
HORVU_MOREX_r3_6HG0542040
HORVU_MOREX_r3_7HG0711530
HORVU_MOREX_r3_4HG0390750
novel.5718
HORVU_MOREX_r3_6HG0551650
HORVU_MOREX_r3_5HG0436820
HORVU_MOREX_r3_2HG0158150
HORVU_MOREX_r3_4HG0334110
HORVU_MOREX_r3_1HG0083620
HORVU_MOREX_r3_4HG0396080
HORVU_MOREX_r3_4HG0415040
HORVU_MOREX_r3_7HG0705460
HORVU_MOREX_r3_1HG0050330
HORVU_MOREX_r3_7HG0710400
HORVU_MOREX_r3_5HG0462580
HORVU_MOREX_r3_2HG0185980
HORVU_MOREX_r3_5HG0517080
HORVU_MOREX_r3_6HG0616070
HORVU_MOREX_r3_3HG0309760
HORVU_MOREX_r3_6HG0612680
novel.7210
HORVU_MOREX_r3_3HG0302520
HORVU_MOREX_r3_3HG0323260
HORVU_MOREX_r3_1HG0018510
HORVU_MOREX_r3_4HG0414960
HORVU_MOREX_r3_3HG0297730
HORVU_MOREX_r3_7HG0666880
HORVU_MOREX_r3_1HG0079870
HORVU_MOREX_r3_7HG0684940
HORVU_MOREX_r3_6HG0557280
HORVU_MOREX_r3_7HG0665050
HORVU_MOREX_r3_2HG0202360
HORVU_MOREX_r3_5HG0497400
HORVU_MOREX_r3_4HG0402760
HORVU_MOREX_r3_4HG0338800
HORVU_MOREX_r3_7HG0666250
HORVU_MOREX_r3_1HG0036440
HORVU_MOREX_r3_4HG0413320
HORVU_MOREX_r3_4HG0415240
HORVU_MOREX_r3_2HG0138420
HORVU_MOREX_r3_3HG0237710
HORVU_MOREX_r3_6HG0582060
HORVU_MOREX_r3_6HG0619650
HORVU_MOREX_r3_2HG0157320
HORVU_MOREX_r3_1HG0077030
HORVU_MOREX_r3_5HG0481140
HORVU_MOREX_r3_3HG0295610
HORVU_MOREX_r3_2HG0186500
HORVU_MOREX_r3_7HG0648620
HORVU_MOREX_r3_6HG0624600
HORVU_MOREX_r3_6HG0620820
HORVU_MOREX_r3_1HG0019140
HORVU_MOREX_r3_3HG0237670
novel.6429
HORVU_MOREX_r3_5HG0421070
HORVU_MOREX_r3_6HG0549420
HORVU_MOREX_r3_2HG0123470
HORVU_MOREX_r3_2HG0172200
HORVU_MOREX_r3_3HG0327850
HORVU_MOREX_r3_5HG0493080
HORVU_MOREX_r3_7HG0718540
HORVU_MOREX_r3_7HG0636900
HORVU_MOREX_r3_3HG0307390
HORVU_MOREX_r3_1HG0086470
HORVU_MOREX_r3_3HG0285000
HORVU_MOREX_r3_1HG0083730
HORVU_MOREX_r3_3HG0291580
HORVU_MOREX_r3_5HG0470890
HORVU_MOREX_r3_5HG0537970
novel.1300
HORVU_MOREX_r3_4HG0335790
HORVU_MOREX_r3_3HG0312020
HORVU_MOREX_r3_1HG0017620
HORVU_MOREX_r3_2HG0116830
HORVU_MOREX_r3_2HG0111570
HORVU_MOREX_r3_4HG0399030
HORVU_MOREX_r3_3HG0290120
HORVU_MOREX_r3_4HG0333240
HORVU_MOREX_r3_5HG0486650
HORVU_MOREX_r3_2HG0096220
HORVU_MOREX_r3_3HG0283770
HORVU_MOREX_r3_5HG0521710
HORVU_MOREX_r3_1HG0015110
HORVU_MOREX_r3_2HG0176950
HORVU_MOREX_r3_7HG0644360
HORVU_MOREX_r3_1HG0027000
HORVU_MOREX_r3_4HG0395480
HORVU_MOREX_r3_7HG0752900
HORVU_MOREX_r3_3HG0286370
HORVU_MOREX_r3_4HG0403590
HORVU_MOREX_r3_6HG0613230
HORVU_MOREX_r3_7HG0675420
HORVU_MOREX_r3_7HG0663370
HORVU_MOREX_r3_1HG0018590
HORVU_MOREX_r3_6HG0568690
HORVU_MOREX_r3_3HG0317780
HORVU_MOREX_r3_2HG0196410
HORVU_MOREX_r3_1HG0079860
HORVU_MOREX_r3_4HG0339390
HORVU_MOREX_r3_7HG0730040
HORVU_MOREX_r3_1HG0073550
HORVU_MOREX_r3_3HG0237690
novel.6308
novel.1922
HORVU_MOREX_r3_2HG0198220
HORVU_MOREX_r3_7HG0680380
HORVU_MOREX_r3_6HG0628210
HORVU_MOREX_r3_5HG0525430
HORVU_MOREX_r3_6HG0601540
HORVU_MOREX_r3_1HG0051710
HORVU_MOREX_r3_3HG0252270
HORVU_MOREX_r3_5HG0423750
HORVU_MOREX_r3_2HG0135210
HORVU_MOREX_r3_7HG0726310
HORVU_MOREX_r3_1HG0008130
HORVU_MOREX_r3_3HG0298030
HORVU_MOREX_r3_4HG0394970
HORVU_MOREX_r3_7HG0709040
HORVU_MOREX_r3_1HG0061660
HORVU_MOREX_r3_3HG0302810
HORVU_MOREX_r3_1HG0059910
HORVU_MOREX_r3_2HG0196390
novel.5741
novel.5422
HORVU_MOREX_r3_1HG0083720
HORVU_MOREX_r3_5HG0487490
HORVU_MOREX_r3_6HG0560910
HORVU_MOREX_r3_7HG0684300
HORVU_MOREX_r3_5HG0473680
HORVU_MOREX_r3_2HG0097390
HORVU_MOREX_r3_5HG0420500
HORVU_MOREX_r3_4HG0333120
HORVU_MOREX_r3_4HG0385330
HORVU_MOREX_r3_3HG0236520
novel.4020
HORVU_MOREX_r3_6HG0617780
HORVU_MOREX_r3_3HG0323270
HORVU_MOREX_r3_2HG0180210
novel.7050
HORVU_MOREX_r3_7HG0687380
HORVU_MOREX_r3_1HG0049480
HORVU_MOREX_r3_5HG0497820
HORVU_MOREX_r3_2HG0115340
HORVU_MOREX_r3_4HG0341090
HORVU_MOREX_r3_1HG0044640
HORVU_MOREX_r3_7HG0676020
HORVU_MOREX_r3_2HG0130270
HORVU_MOREX_r3_2HG0206550
HORVU_MOREX_r3_4HG0398320
HORVU_MOREX_r3_7HG0707700
HORVU_MOREX_r3_1HG0057780
HORVU_MOREX_r3_2HG0186340
HORVU_MOREX_r3_2HG0178450
novel.415
HORVU_MOREX_r3_6HG0593020
HORVU_MOREX_r3_6HG0626850
HORVU_MOREX_r3_5HG0507950
HORVU_MOREX_r3_3HG0232050
HORVU_MOREX_r3_7HG0646060
HORVU_MOREX_r3_4HG0333780
HORVU_MOREX_r3_2HG0206910
HORVU_MOREX_r3_3HG0283820
HORVU_MOREX_r3_1HG0056440
novel.2235
novel.5924
HORVU_MOREX_r3_4HG0390200
HORVU_MOREX_r3_2HG0119120
HORVU_MOREX_r3_4HG0389340
HORVU_MOREX_r3_1HG0062140
HORVU_MOREX_r3_2HG0192000
HORVU_MOREX_r3_5HG0480200
HORVU_MOREX_r3_5HG0529760
HORVU_MOREX_r3_5HG0426450
HORVU_MOREX_r3_5HG0459670
HORVU_MOREX_r3_7HG0644370
HORVU_MOREX_r3_1HG0017410
novel.7098
HORVU_MOREX_r3_4HG0397570
HORVU_MOREX_r3_1HG0061300
HORVU_MOREX_r3_3HG0293850
HORVU_MOREX_r3_4HG0417010
HORVU_MOREX_r3_7HG0665990
HORVU_MOREX_r3_3HG0293360
HORVU_MOREX_r3_7HG0640130
HORVU_MOREX_r3_3HG0295580
novel.4567
HORVU_MOREX_r3_7HG0679610
HORVU_MOREX_r3_5HG0488040
HORVU_MOREX_r3_5HG0465890
HORVU_MOREX_r3_7HG0720280
HORVU_MOREX_r3_6HG0633820
HORVU_MOREX_r3_1HG0067250
HORVU_MOREX_r3_1HG0018050
HORVU_MOREX_r3_5HG0537000
HORVU_MOREX_r3_4HG0404720
HORVU_MOREX_r3_5HG0486340
HORVU_MOREX_r3_4HG0348030
HORVU_MOREX_r3_1HG0091810
HORVU_MOREX_r3_7HG0648360
HORVU_MOREX_r3_3HG0239600
HORVU_MOREX_r3_2HG0210620
HORVU_MOREX_r3_4HG0409870
HORVU_MOREX_r3_2HG0188640
HORVU_MOREX_r3_2HG0183310
HORVU_MOREX_r3_2HG0126390
HORVU_MOREX_r3_3HG0275440
novel.3426
HORVU_MOREX_r3_6HG0619290
HORVU_MOREX_r3_1HG0024740
HORVU_MOREX_r3_5HG0469340
HORVU_MOREX_r3_1HG0005590
HORVU_MOREX_r3_7HG0675960
HORVU_MOREX_r3_5HG0501980
novel.2652
HORVU_MOREX_r3_2HG0131570
HORVU_MOREX_r3_5HG0522560
HORVU_MOREX_r3_4HG0345580
HORVU_MOREX_r3_3HG0288010
HORVU_MOREX_r3_6HG0542970
HORVU_MOREX_r3_3HG0275650
HORVU_MOREX_r3_5HG0441320
novel.5851
HORVU_MOREX_r3_5HG0509200
novel.4153
HORVU_MOREX_r3_2HG0183370
HORVU_MOREX_r3_7HG0731130
HORVU_MOREX_r3_7HG0708100
HORVU_MOREX_r3_4HG0415030
HORVU_MOREX_r3_6HG0608160
HORVU_MOREX_r3_3HG0324410
HORVU_MOREX_r3_7HG0680680
HORVU_MOREX_r3_2HG0183550
HORVU_MOREX_r3_1HG0019230
HORVU_MOREX_r3_2HG0106430
HORVU_MOREX_r3_5HG0508300
HORVU_MOREX_r3_4HG0380970
HORVU_MOREX_r3_4HG0413540
HORVU_MOREX_r3_5HG0489830
HORVU_MOREX_r3_4HG0352710
HORVU_MOREX_r3_1HG0027930
HORVU_MOREX_r3_6HG0570900
HORVU_MOREX_r3_7HG0748900
HORVU_MOREX_r3_7HG0645710
novel.4374
novel.6542
HORVU_MOREX_r3_6HG0571770
HORVU_MOREX_r3_4HG0393120
HORVU_MOREX_r3_4HG0384780
HORVU_MOREX_r3_3HG0257780
HORVU_MOREX_r3_7HG0686950
novel.6525
HORVU_MOREX_r3_7HG0717400
HORVU_MOREX_r3_3HG0301990
HORVU_MOREX_r3_4HG0394400
HORVU_MOREX_r3_2HG0126380
HORVU_MOREX_r3_1HG0055270
HORVU_MOREX_r3_6HG0622500
HORVU_MOREX_r3_7HG0683020
HORVU_MOREX_r3_2HG0196720
HORVU_MOREX_r3_2HG0123490
HORVU_MOREX_r3_4HG0394980
HORVU_MOREX_r3_4HG0412610
HORVU_MOREX_r3_5HG0487660
HORVU_MOREX_r3_2HG0174510
HORVU_MOREX_r3_4HG0357420
HORVU_MOREX_r3_2HG0166290
HORVU_MOREX_r3_5HG0433990
HORVU_MOREX_r3_1HG0084970
HORVU_MOREX_r3_1HG0077640
novel.2423
HORVU_MOREX_r3_6HG0596580
HORVU_MOREX_r3_2HG0206820
HORVU_MOREX_r3_2HG0187360
HORVU_MOREX_r3_7HG0642890
HORVU_MOREX_r3_4HG0397010
HORVU_MOREX_r3_2HG0174080
HORVU_MOREX_r3_2HG0123830
HORVU_MOREX_r3_7HG0714970
HORVU_MOREX_r3_5HG0485390
novel.789
HORVU_MOREX_r3_7HG0714400
HORVU_MOREX_r3_3HG0297940
HORVU_MOREX_r3_1HG0064610
HORVU_MOREX_r3_1HG0087620
HORVU_MOREX_r3_6HG0593770
HORVU_MOREX_r3_3HG0240890
HORVU_MOREX_r3_2HG0129410
HORVU_MOREX_r3_1HG0082230
HORVU_MOREX_r3_3HG0226120
HORVU_MOREX_r3_7HG0679410
novel.5414
HORVU_MOREX_r3_7HG0637150
HORVU_MOREX_r3_4HG0410140
HORVU_MOREX_r3_2HG0214260
novel.1312
HORVU_MOREX_r3_1HG0094560
HORVU_MOREX_r3_5HG0485790
HORVU_MOREX_r3_4HG0406120
HORVU_MOREX_r3_2HG0162560
HORVU_MOREX_r3_4HG0338290
HORVU_MOREX_r3_5HG0479630
HORVU_MOREX_r3_4HG0375550
HORVU_MOREX_r3_3HG0290950
HORVU_MOREX_r3_1HG0062740
HORVU_MOREX_r3_5HG0496820
novel.6595
HORVU_MOREX_r3_3HG0325640
HORVU_MOREX_r3_4HG0339340
HORVU_MOREX_r3_6HG0565970
HORVU_MOREX_r3_1HG0082760
HORVU_MOREX_r3_6HG0619800
HORVU_MOREX_r3_4HG0405920
HORVU_MOREX_r3_2HG0187880
HORVU_MOREX_r3_3HG0285170
HORVU_MOREX_r3_3HG0287680
HORVU_MOREX_r3_5HG0445760
HORVU_MOREX_r3_3HG0318260
HORVU_MOREX_r3_7HG0663610
HORVU_MOREX_r3_3HG0259280
HORVU_MOREX_r3_7HG0655170
HORVU_MOREX_r3_1HG0015130
HORVU_MOREX_r3_2HG0136680
HORVU_MOREX_r3_3HG0291030
HORVU_MOREX_r3_6HG0632000
novel.1645
HORVU_MOREX_r3_6HG0606210
novel.7271
HORVU_MOREX_r3_2HG0105150
HORVU_MOREX_r3_1HG0045540
HORVU_MOREX_r3_1HG0016710
HORVU_MOREX_r3_2HG0209470
HORVU_MOREX_r3_4HG0410510
HORVU_MOREX_r3_3HG0248210
HORVU_MOREX_r3_5HG0532190
HORVU_MOREX_r3_6HG0616740
HORVU_MOREX_r3_3HG0237680
novel.6302
HORVU_MOREX_r3_6HG0621200
HORVU_MOREX_r3_7HG0728720
HORVU_MOREX_r3_7HG0659440
HORVU_MOREX_r3_5HG0537740
HORVU_MOREX_r3_7HG0641160
HORVU_MOREX_r3_1HG0020820
novel.3424
HORVU_MOREX_r3_6HG0538460
HORVU_MOREX_r3_5HG0477460
HORVU_MOREX_r3_5HG0490800
HORVU_MOREX_r3_3HG0252150
HORVU_MOREX_r3_4HG0418170
HORVU_MOREX_r3_5HG0486840
novel.6656
HORVU_MOREX_r3_3HG0220290
HORVU_MOREX_r3_5HG0536610
HORVU_MOREX_r3_4HG0415490
HORVU_MOREX_r3_4HG0389430
novel.5265
HORVU_MOREX_r3_2HG0103920
HORVU_MOREX_r3_5HG0472420
HORVU_MOREX_r3_4HG0339610
HORVU_MOREX_r3_5HG0537210
HORVU_MOREX_r3_5HG0463700
HORVU_MOREX_r3_4HG0407390
HORVU_MOREX_r3_2HG0205970
HORVU_MOREX_r3_5HG0510030
HORVU_MOREX_r3_3HG0306130
HORVU_MOREX_r3_5HG0486320
novel.3570
HORVU_MOREX_r3_2HG0123910
novel.1665
novel.6045
HORVU_MOREX_r3_7HG0649960
HORVU_MOREX_r3_2HG0182630
HORVU_MOREX_r3_1HG0011870
novel.1130
HORVU_MOREX_r3_6HG0602870
novel.6698
HORVU_MOREX_r3_4HG0412560
HORVU_MOREX_r3_5HG0481640
HORVU_MOREX_r3_2HG0186490
HORVU_MOREX_r3_7HG0728870
HORVU_MOREX_r3_6HG0552570
novel.5871
HORVU_MOREX_r3_1HG0016760
HORVU_MOREX_r3_1HG0067630
HORVU_MOREX_r3_6HG0538470
HORVU_MOREX_r3_1HG0013800
HORVU_MOREX_r3_2HG0171580
HORVU_MOREX_r3_1HG0089120
HORVU_MOREX_r3_3HG0239650
HORVU_MOREX_r3_3HG0264530
novel.2770
novel.1056
HORVU_MOREX_r3_7HG0654670
HORVU_MOREX_r3_6HG0538450
novel.1278
HORVU_MOREX_r3_7HG0731220
HORVU_MOREX_r3_7HG0749430
HORVU_MOREX_r3_3HG0303660
HORVU_MOREX_r3_1HG0053890
HORVU_MOREX_r3_7HG0644300
HORVU_MOREX_r3_6HG0542050
HORVU_MOREX_r3_3HG0320910
HORVU_MOREX_r3_7HG0728120
HORVU_MOREX_r3_5HG0423780
HORVU_MOREX_r3_2HG0121520
HORVU_MOREX_r3_1HG0053580
HORVU_MOREX_r3_5HG0457710
HORVU_MOREX_r3_3HG0310060
HORVU_MOREX_r3_4HG0335550
HORVU_MOREX_r3_7HG0657870
HORVU_MOREX_r3_2HG0196370
HORVU_MOREX_r3_2HG0131920
HORVU_MOREX_r3_5HG0463760
novel.2103
novel.52
HORVU_MOREX_r3_1HG0077840
HORVU_MOREX_r3_1HG0010650
novel.4772
HORVU_MOREX_r3_5HG0446860
HORVU_MOREX_r3_3HG0259870
HORVU_MOREX_r3_4HG0392580
HORVU_MOREX_r3_2HG0196470
HORVU_MOREX_r3_4HG0409190
HORVU_MOREX_r3_2HG0135760
HORVU_MOREX_r3_4HG0395580
novel.5904
HORVU_MOREX_r3_7HG0740290
HORVU_MOREX_r3_5HG0471840
HORVU_MOREX_r3_5HG0486370
novel.7479
HORVU_MOREX_r3_5HG0443730
HORVU_MOREX_r3_7HG0720790
HORVU_MOREX_r3_7HG0669790
HORVU_MOREX_r3_7HG0658560
HORVU_MOREX_r3_1HG0008440
HORVU_MOREX_r3_3HG0270610
HORVU_MOREX_r3_1HG0074330
HORVU_MOREX_r3_3HG0277200
HORVU_MOREX_r3_3HG0255490
HORVU_MOREX_r3_2HG0210870
HORVU_MOREX_r3_3HG0298540
HORVU_MOREX_r3_7HG0728580
novel.2553
novel.380
novel.3589
HORVU_MOREX_r3_1HG0066180
HORVU_MOREX_r3_7HG0678240
HORVU_MOREX_r3_4HG0409210
HORVU_MOREX_r3_4HG0382910
HORVU_MOREX_r3_2HG0189890
HORVU_MOREX_r3_5HG0510360
HORVU_MOREX_r3_7HG0676100
HORVU_MOREX_r3_3HG0236100
novel.6272
HORVU_MOREX_r3_7HG0683980
HORVU_MOREX_r3_2HG0185850
novel.2417
HORVU_MOREX_r3_3HG0325650
HORVU_MOREX_r3_3HG0294900
novel.3694
HORVU_MOREX_r3_4HG0352600
HORVU_MOREX_r3_4HG0397520
HORVU_MOREX_r3_3HG0310750
HORVU_MOREX_r3_3HG0297000
HORVU_MOREX_r3_1HG0048840
HORVU_MOREX_r3_2HG0204590
HORVU_MOREX_r3_2HG0171480
HORVU_MOREX_r3_7HG0737470
HORVU_MOREX_r3_6HG0596900
HORVU_MOREX_r3_5HG0535920
HORVU_MOREX_r3_4HG0410950
HORVU_MOREX_r3_7HG0640740
HORVU_MOREX_r3_3HG0285940
novel.6512
HORVU_MOREX_r3_3HG0307120
HORVU_MOREX_r3_5HG0471050
HORVU_MOREX_r3_7HG0707220
HORVU_MOREX_r3_3HG0314010
HORVU_MOREX_r3_7HG0723340
HORVU_MOREX_r3_5HG0534330
novel.1201
HORVU_MOREX_r3_2HG0127050
HORVU_MOREX_r3_7HG0724830
HORVU_MOREX_r3_7HG0708840
HORVU_MOREX_r3_3HG0243610
HORVU_MOREX_r3_3HG0290000
HORVU_MOREX_r3_7HG0687260
HORVU_MOREX_r3_6HG0551740
HORVU_MOREX_r3_3HG0300970
HORVU_MOREX_r3_1HG0080250
novel.3019
HORVU_MOREX_r3_7HG0687050
HORVU_MOREX_r3_1HG0047480
HORVU_MOREX_r3_3HG0231020
HORVU_MOREX_r3_1HG0082180
HORVU_MOREX_r3_6HG0579870
HORVU_MOREX_r3_3HG0295040
HORVU_MOREX_r3_7HG0682660
HORVU_MOREX_r3_4HG0392940
HORVU_MOREX_r3_3HG0315570
HORVU_MOREX_r3_7HG0746540
HORVU_MOREX_r3_3HG0232910
HORVU_MOREX_r3_4HG0389120
HORVU_MOREX_r3_2HG0169040
novel.1766
HORVU_MOREX_r3_3HG0266110
HORVU_MOREX_r3_6HG0623840
HORVU_MOREX_r3_3HG0267820
HORVU_MOREX_r3_3HG0284170
HORVU_MOREX_r3_7HG0686960
novel.4497
HORVU_MOREX_r3_2HG0181800
HORVU_MOREX_r3_3HG0300270
HORVU_MOREX_r3_2HG0112440
novel.3676
HORVU_MOREX_r3_5HG0508630
novel.1980
HORVU_MOREX_r3_2HG0127990
HORVU_MOREX_r3_4HG0384790
HORVU_MOREX_r3_5HG0440610
HORVU_MOREX_r3_2HG0137420
HORVU_MOREX_r3_4HG0351550
novel.169
HORVU_MOREX_r3_7HG0655800
HORVU_MOREX_r3_2HG0192300
HORVU_MOREX_r3_2HG0139440
HORVU_MOREX_r3_2HG0199330
novel.2161
HORVU_MOREX_r3_5HG0494810
HORVU_MOREX_r3_5HG0509120
HORVU_MOREX_r3_3HG0306620
HORVU_MOREX_r3_4HG0341800
HORVU_MOREX_r3_6HG0574650
HORVU_MOREX_r3_1HG0087810
novel.3769
HORVU_MOREX_r3_5HG0484140
novel.5625
HORVU_MOREX_r3_5HG0489470
HORVU_MOREX_r3_5HG0494180
HORVU_MOREX_r3_3HG0249600
novel.3166
HORVU_MOREX_r3_1HG0058280
HORVU_MOREX_r3_2HG0206630
HORVU_MOREX_r3_3HG0245560
HORVU_MOREX_r3_3HG0298340
HORVU_MOREX_r3_3HG0291100
HORVU_MOREX_r3_2HG0201540
HORVU_MOREX_r3_2HG0130030
novel.3510
HORVU_MOREX_r3_7HG0711230
HORVU_MOREX_r3_2HG0214630
HORVU_MOREX_r3_4HG0379640
HORVU_MOREX_r3_7HG0687920
HORVU_MOREX_r3_6HG0593470
HORVU_MOREX_r3_1HG0027280
HORVU_MOREX_r3_4HG0335230
novel.3997
HORVU_MOREX_r3_3HG0226780
HORVU_MOREX_r3_6HG0634290
HORVU_MOREX_r3_5HG0471140
HORVU_MOREX_r3_1HG0088680
HORVU_MOREX_r3_7HG0665730
HORVU_MOREX_r3_4HG0344370
HORVU_MOREX_r3_2HG0112410
HORVU_MOREX_r3_5HG0512410
HORVU_MOREX_r3_1HG0057040
HORVU_MOREX_r3_2HG0133020
HORVU_MOREX_r3_4HG0408390
novel.3670
HORVU_MOREX_r3_1HG0049040
HORVU_MOREX_r3_1HG0073420
HORVU_MOREX_r3_7HG0660840
HORVU_MOREX_r3_7HG0708730
HORVU_MOREX_r3_5HG0524560
HORVU_MOREX_r3_4HG0336940
HORVU_MOREX_r3_3HG0298240
HORVU_MOREX_r3_3HG0294380
HORVU_MOREX_r3_1HG0075750
novel.1385
HORVU_MOREX_r3_7HG0644400
HORVU_MOREX_r3_4HG0390450
HORVU_MOREX_r3_2HG0152160
HORVU_MOREX_r3_3HG0219500
novel.6671
novel.7380
HORVU_MOREX_r3_7HG0667150
novel.359
HORVU_MOREX_r3_3HG0246500
HORVU_MOREX_r3_5HG0469960
HORVU_MOREX_r3_2HG0209040
HORVU_MOREX_r3_7HG0654500
HORVU_MOREX_r3_6HG0610000
HORVU_MOREX_r3_1HG0002470
HORVU_MOREX_r3_6HG0614960
HORVU_MOREX_r3_1HG0052250
HORVU_MOREX_r3_2HG0135400
novel.3657
HORVU_MOREX_r3_6HG0617050
HORVU_MOREX_r3_3HG0249060
HORVU_MOREX_r3_3HG0305900
novel.3185
HORVU_MOREX_r3_2HG0190560
HORVU_MOREX_r3_2HG0107420
HORVU_MOREX_r3_2HG0157170
HORVU_MOREX_r3_2HG0104680
novel.3545
novel.2360
HORVU_MOREX_r3_7HG0743900
HORVU_MOREX_r3_5HG0537780
novel.4132
HORVU_MOREX_r3_5HG0471340
HORVU_MOREX_r3_3HG0244960
HORVU_MOREX_r3_4HG0409110
HORVU_MOREX_r3_6HG0615630
HORVU_MOREX_r3_5HG0537360
HORVU_MOREX_r3_3HG0279110
HORVU_MOREX_r3_4HG0412370
novel.1299
novel.972
HORVU_MOREX_r3_4HG0399760
HORVU_MOREX_r3_2HG0141200
novel.7259
novel.4663
novel.938
HORVU_MOREX_r3_4HG0403040
HORVU_MOREX_r3_2HG0107070
HORVU_MOREX_r3_1HG0090100
HORVU_MOREX_r3_2HG0139370
novel.73
HORVU_MOREX_r3_7HG0689010
HORVU_MOREX_r3_4HG0342540
HORVU_MOREX_r3_7HG0674710
HORVU_MOREX_r3_3HG0311160
novel.6236
HORVU_MOREX_r3_3HG0255230
HORVU_MOREX_r3_5HG0531920
HORVU_MOREX_r3_1HG0047320
HORVU_MOREX_r3_3HG0289720
HORVU_MOREX_r3_4HG0409200
HORVU_MOREX_r3_4HG0397890
novel.1430
novel.2806
novel.125
HORVU_MOREX_r3_7HG0669780
novel.6770
HORVU_MOREX_r3_1HG0095410
novel.1053
HORVU_MOREX_r3_4HG0392680
HORVU_MOREX_r3_5HG0505590
HORVU_MOREX_r3_2HG0215770
HORVU_MOREX_r3_4HG0385790
HORVU_MOREX_r3_1HG0072340
HORVU_MOREX_r3_3HG0253860
HORVU_MOREX_r3_5HG0529400
HORVU_MOREX_r3_6HG0600000
HORVU_MOREX_r3_4HG0413800
HORVU_MOREX_r3_4HG0403680
HORVU_MOREX_r3_5HG0533720
HORVU_MOREX_r3_5HG0486640
HORVU_MOREX_r3_5HG0484630
novel.4788
HORVU_MOREX_r3_3HG0312320
HORVU_MOREX_r3_7HG0731430
HORVU_MOREX_r3_2HG0100180
novel.4597
HORVU_MOREX_r3_2HG0100080
HORVU_MOREX_r3_2HG0165730
HORVU_MOREX_r3_1HG0046460
HORVU_MOREX_r3_6HG0620920
HORVU_MOREX_r3_7HG0739280
HORVU_MOREX_r3_5HG0516880
HORVU_MOREX_r3_7HG0720560
HORVU_MOREX_r3_7HG0634950
HORVU_MOREX_r3_2HG0127530
HORVU_MOREX_r3_6HG0606710
HORVU_MOREX_r3_5HG0463670
novel.5850
HORVU_MOREX_r3_4HG0370560
novel.441
novel.1
HORVU_MOREX_r3_4HG0380440
HORVU_MOREX_r3_3HG0289630
HORVU_MOREX_r3_2HG0159040
HORVU_MOREX_r3_6HG0565800
HORVU_MOREX_r3_1HG0062460
HORVU_MOREX_r3_2HG0207560
HORVU_MOREX_r3_4HG0405780
HORVU_MOREX_r3_7HG0635320
HORVU_MOREX_r3_1HG0079250
HORVU_MOREX_r3_5HG0516830
HORVU_MOREX_r3_7HG0681220
HORVU_MOREX_r3_6HG0605460
HORVU_MOREX_r3_4HG0341050
HORVU_MOREX_r3_4HG0347650
HORVU_MOREX_r3_5HG0525230
HORVU_MOREX_r3_2HG0183880
HORVU_MOREX_r3_7HG0691910
HORVU_MOREX_r3_7HG0715300
HORVU_MOREX_r3_4HG0416970
HORVU_MOREX_r3_5HG0460300
HORVU_MOREX_r3_7HG0655660
HORVU_MOREX_r3_6HG0616020
novel.275
HORVU_MOREX_r3_5HG0522000
HORVU_MOREX_r3_6HG0602250
HORVU_MOREX_r3_4HG0411010
HORVU_MOREX_r3_3HG0240600
novel.1871
HORVU_MOREX_r3_1HG0028250
HORVU_MOREX_r3_5HG0485780
HORVU_MOREX_r3_2HG0143770
HORVU_MOREX_r3_7HG0732330
HORVU_MOREX_r3_4HG0417080
HORVU_MOREX_r3_2HG0177600
HORVU_MOREX_r3_2HG0127370
novel.1549
novel.711
HORVU_MOREX_r3_5HG0495890
HORVU_MOREX_r3_5HG0490650
HORVU_MOREX_r3_2HG0168350
novel.2130
HORVU_MOREX_r3_5HG0426840
novel.4688
HORVU_MOREX_r3_6HG0538360
HORVU_MOREX_r3_3HG0289910
HORVU_MOREX_r3_1HG0090310
HORVU_MOREX_r3_5HG0493200
HORVU_MOREX_r3_4HG0331240
HORVU_MOREX_r3_6HG0604610
HORVU_MOREX_r3_2HG0180710
HORVU_MOREX_r3_2HG0170250
HORVU_MOREX_r3_6HG0616850
HORVU_MOREX_r3_3HG0246030
novel.966
HORVU_MOREX_r3_2HG0196510
HORVU_MOREX_r3_2HG0179410
HORVU_MOREX_r3_3HG0283630
HORVU_MOREX_r3_3HG0302700
HORVU_MOREX_r3_1HG0055640
HORVU_MOREX_r3_1HG0015750
HORVU_MOREX_r3_6HG0634060
HORVU_MOREX_r3_2HG0160690
HORVU_MOREX_r3_5HG0478340
HORVU_MOREX_r3_5HG0478250
HORVU_MOREX_r3_4HG0403000
HORVU_MOREX_r3_6HG0569900
HORVU_MOREX_r3_4HG0342510
novel.3683
HORVU_MOREX_r3_2HG0211750
novel.3754
HORVU_MOREX_r3_5HG0454230
HORVU_MOREX_r3_6HG0594570
HORVU_MOREX_r3_1HG0076150
HORVU_MOREX_r3_6HG0570980
HORVU_MOREX_r3_7HG0634590
HORVU_MOREX_r3_7HG0681850
HORVU_MOREX_r3_3HG0251570
HORVU_MOREX_r3_1HG0069570
HORVU_MOREX_r3_2HG0152140
novel.5755
HORVU_MOREX_r3_2HG0135530
HORVU_MOREX_r3_6HG0626460
novel.4069
HORVU_MOREX_r3_2HG0107700
HORVU_MOREX_r3_5HG0479860
HORVU_MOREX_r3_1HG0093680
HORVU_MOREX_r3_5HG0510220
HORVU_MOREX_r3_6HG0591920
novel.3464
HORVU_MOREX_r3_4HG0386330
HORVU_MOREX_r3_7HG0728710
HORVU_MOREX_r3_7HG0651010
HORVU_MOREX_r3_4HG0378580
HORVU_MOREX_r3_4HG0418700
HORVU_MOREX_r3_2HG0193700
novel.6134
HORVU_MOREX_r3_2HG0158680
HORVU_MOREX_r3_5HG0537110
novel.1046
HORVU_MOREX_r3_4HG0358980
HORVU_MOREX_r3_6HG0622690
HORVU_MOREX_r3_4HG0416550
HORVU_MOREX_r3_3HG0305770
HORVU_MOREX_r3_2HG0123280
HORVU_MOREX_r3_7HG0737960
HORVU_MOREX_r3_6HG0553430
novel.2561
HORVU_MOREX_r3_5HG0480600
HORVU_MOREX_r3_3HG0225550
novel.6497
HORVU_MOREX_r3_7HG0643650
HORVU_MOREX_r3_7HG0637190
HORVU_MOREX_r3_3HG0299650
HORVU_MOREX_r3_4HG0383410
HORVU_MOREX_r3_4HG0404460
novel.3073
HORVU_MOREX_r3_2HG0160130
HORVU_MOREX_r3_6HG0600130
HORVU_MOREX_r3_7HG0635460
HORVU_MOREX_r3_7HG0710770
HORVU_MOREX_r3_7HG0718380
HORVU_MOREX_r3_7HG0740440
HORVU_MOREX_r3_5HG0478830
HORVU_MOREX_r3_1HG0070730
HORVU_MOREX_r3_5HG0487300
HORVU_MOREX_r3_6HG0576780
HORVU_MOREX_r3_5HG0516640
HORVU_MOREX_r3_2HG0217090
novel.498
HORVU_MOREX_r3_4HG0335030
HORVU_MOREX_r3_5HG0429930
HORVU_MOREX_r3_5HG0485730
HORVU_MOREX_r3_3HG0288420
HORVU_MOREX_r3_5HG0496010
HORVU_MOREX_r3_2HG0104500
novel.1964
HORVU_MOREX_r3_5HG0480620
HORVU_MOREX_r3_1HG0052060
HORVU_MOREX_r3_1HG0064310
HORVU_MOREX_r3_7HG0639230
HORVU_MOREX_r3_4HG0348800
HORVU_MOREX_r3_5HG0501080
HORVU_MOREX_r3_2HG0113570
HORVU_MOREX_r3_7HG0703770
HORVU_MOREX_r3_1HG0089130
HORVU_MOREX_r3_6HG0546630
HORVU_MOREX_r3_5HG0427840
HORVU_MOREX_r3_2HG0194790
HORVU_MOREX_r3_6HG0546870
HORVU_MOREX_r3_4HG0357630
HORVU_MOREX_r3_5HG0504410
HORVU_MOREX_r3_7HG0729620
novel.6501
HORVU_MOREX_r3_1HG0077230
HORVU_MOREX_r3_6HG0579820
HORVU_MOREX_r3_6HG0605350
HORVU_MOREX_r3_5HG0536120
HORVU_MOREX_r3_5HG0511040
HORVU_MOREX_r3_6HG0608910
HORVU_MOREX_r3_1HG0076060
HORVU_MOREX_r3_4HG0411020
HORVU_MOREX_r3_5HG0459140
HORVU_MOREX_r3_4HG0359100
HORVU_MOREX_r3_5HG0527630
HORVU_MOREX_r3_3HG0306830
HORVU_MOREX_r3_3HG0255820
HORVU_MOREX_r3_3HG0308570
HORVU_MOREX_r3_2HG0208170
HORVU_MOREX_r3_5HG0498710
novel.847
novel.4997
HORVU_MOREX_r3_7HG0662420
HORVU_MOREX_r3_5HG0497560
HORVU_MOREX_r3_4HG0416070
HORVU_MOREX_r3_7HG0736150
HORVU_MOREX_r3_6HG0575030
HORVU_MOREX_r3_3HG0219050
HORVU_MOREX_r3_3HG0223980
HORVU_MOREX_r3_3HG0289150
HORVU_MOREX_r3_5HG0468580
novel.3548
HORVU_MOREX_r3_5HG0424280
HORVU_MOREX_r3_7HG0731950
HORVU_MOREX_r3_3HG0276160
HORVU_MOREX_r3_3HG0287930
HORVU_MOREX_r3_2HG0169670
HORVU_MOREX_r3_2HG0105080
novel.1772
HORVU_MOREX_r3_5HG0534480
HORVU_MOREX_r3_5HG0517140
HORVU_MOREX_r3_3HG0312290
novel.6587
HORVU_MOREX_r3_7HG0668850
HORVU_MOREX_r3_2HG0167750
novel.3491
HORVU_MOREX_r3_2HG0184080
HORVU_MOREX_r3_2HG0194810
HORVU_MOREX_r3_5HG0533330
HORVU_MOREX_r3_3HG0302040
HORVU_MOREX_r3_1HG0043850
novel.4032
HORVU_MOREX_r3_7HG0711310
HORVU_MOREX_r3_6HG0579890
HORVU_MOREX_r3_6HG0632820
HORVU_MOREX_r3_2HG0215190
HORVU_MOREX_r3_3HG0268760
HORVU_MOREX_r3_1HG0087820
novel.5767
HORVU_MOREX_r3_7HG0703220
HORVU_MOREX_r3_3HG0224000
HORVU_MOREX_r3_2HG0191150
novel.3360
HORVU_MOREX_r3_2HG0194280
HORVU_MOREX_r3_6HG0556720
novel.3072
HORVU_MOREX_r3_4HG0380080
HORVU_MOREX_r3_2HG0189340
HORVU_MOREX_r3_6HG0615550
HORVU_MOREX_r3_1HG0067090
HORVU_MOREX_r3_1HG0061750
HORVU_MOREX_r3_2HG0216220
novel.92
HORVU_MOREX_r3_2HG0106230
HORVU_MOREX_r3_5HG0495640
HORVU_MOREX_r3_5HG0420920
HORVU_MOREX_r3_1HG0000850
HORVU_MOREX_r3_7HG0663430
novel.5513
HORVU_MOREX_r3_3HG0248990
HORVU_MOREX_r3_3HG0295200
HORVU_MOREX_r3_3HG0307420
HORVU_MOREX_r3_5HG0491360
novel.5332
HORVU_MOREX_r3_4HG0394680
HORVU_MOREX_r3_7HG0670790
HORVU_MOREX_r3_3HG0221460
HORVU_MOREX_r3_5HG0434380
HORVU_MOREX_r3_6HG0546700
HORVU_MOREX_r3_3HG0240400
HORVU_MOREX_r3_3HG0321110
HORVU_MOREX_r3_2HG0199160
HORVU_MOREX_r3_1HG0082910
HORVU_MOREX_r3_4HG0413370
HORVU_MOREX_r3_1HG0027200
novel.6125
HORVU_MOREX_r3_5HG0497770
HORVU_MOREX_r3_5HG0491150
HORVU_MOREX_r3_2HG0119270
HORVU_MOREX_r3_5HG0429520
novel.2245
HORVU_MOREX_r3_3HG0243310
HORVU_MOREX_r3_3HG0236140
HORVU_MOREX_r3_1HG0083780
novel.1840
HORVU_MOREX_r3_1HG0025870
HORVU_MOREX_r3_3HG0290240
HORVU_MOREX_r3_1HG0018200
HORVU_MOREX_r3_6HG0615400
HORVU_MOREX_r3_6HG0582870
HORVU_MOREX_r3_7HG0663950
HORVU_MOREX_r3_7HG0670520
HORVU_MOREX_r3_3HG0302070
HORVU_MOREX_r3_3HG0283250
HORVU_MOREX_r3_6HG0552590
novel.4755
HORVU_MOREX_r3_2HG0191650
HORVU_MOREX_r3_5HG0429900
novel.4483
HORVU_MOREX_r3_1HG0066600
HORVU_MOREX_r3_5HG0523950
HORVU_MOREX_r3_7HG0680960
novel.843
HORVU_MOREX_r3_4HG0387070
HORVU_MOREX_r3_4HG0410750
HORVU_MOREX_r3_1HG0073600
HORVU_MOREX_r3_2HG0181170
novel.2625
HORVU_MOREX_r3_2HG0181490
HORVU_MOREX_r3_2HG0099810
HORVU_MOREX_r3_4HG0337950
HORVU_MOREX_r3_2HG0178720
HORVU_MOREX_r3_3HG0301980
HORVU_MOREX_r3_7HG0651990
HORVU_MOREX_r3_5HG0495430
HORVU_MOREX_r3_7HG0666660
HORVU_MOREX_r3_4HG0359070
HORVU_MOREX_r3_2HG0156930
HORVU_MOREX_r3_5HG0433070
HORVU_MOREX_r3_7HG0678940
novel.1909
HORVU_MOREX_r3_5HG0497810
HORVU_MOREX_r3_UnG0753160
HORVU_MOREX_r3_2HG0116360
HORVU_MOREX_r3_3HG0297700
HORVU_MOREX_r3_5HG0444790
HORVU_MOREX_r3_1HG0020980
HORVU_MOREX_r3_7HG0666340
HORVU_MOREX_r3_6HG0588300
HORVU_MOREX_r3_5HG0431510
HORVU_MOREX_r3_6HG0598930
HORVU_MOREX_r3_5HG0482580
HORVU_MOREX_r3_5HG0505470
HORVU_MOREX_r3_3HG0237810
HORVU_MOREX_r3_2HG0169000
HORVU_MOREX_r3_4HG0371550
HORVU_MOREX_r3_7HG0747500
HORVU_MOREX_r3_6HG0542320
HORVU_MOREX_r3_7HG0651170
HORVU_MOREX_r3_1HG0079750
HORVU_MOREX_r3_5HG0534860
novel.431
HORVU_MOREX_r3_5HG0487000
HORVU_MOREX_r3_2HG0198710
novel.2767
HORVU_MOREX_r3_2HG0128230
HORVU_MOREX_r3_7HG0689310
HORVU_MOREX_r3_7HG0656350
HORVU_MOREX_r3_2HG0214090
HORVU_MOREX_r3_2HG0105420
HORVU_MOREX_r3_5HG0460760
HORVU_MOREX_r3_7HG0687960
HORVU_MOREX_r3_7HG0704450
HORVU_MOREX_r3_1HG0056620
novel.1832
HORVU_MOREX_r3_5HG0491740
HORVU_MOREX_r3_1HG0057570
HORVU_MOREX_r3_6HG0566190
HORVU_MOREX_r3_7HG0642220
novel.5086
HORVU_MOREX_r3_2HG0168480
HORVU_MOREX_r3_1HG0055610
HORVU_MOREX_r3_1HG0022790
HORVU_MOREX_r3_5HG0510930
HORVU_MOREX_r3_2HG0113010
HORVU_MOREX_r3_5HG0477420
HORVU_MOREX_r3_4HG0404380
HORVU_MOREX_r3_4HG0415640
HORVU_MOREX_r3_5HG0520520
HORVU_MOREX_r3_6HG0551990
novel.4953
HORVU_MOREX_r3_2HG0173410
HORVU_MOREX_r3_3HG0319810
HORVU_MOREX_r3_7HG0731750
HORVU_MOREX_r3_7HG0649080
HORVU_MOREX_r3_3HG0313520
HORVU_MOREX_r3_6HG0568780
HORVU_MOREX_r3_7HG0739080
HORVU_MOREX_r3_3HG0311730
HORVU_MOREX_r3_6HG0619660
HORVU_MOREX_r3_5HG0515060
HORVU_MOREX_r3_4HG0335450
HORVU_MOREX_r3_1HG0076820
HORVU_MOREX_r3_6HG0619890
HORVU_MOREX_r3_2HG0111880
HORVU_MOREX_r3_7HG0658900
HORVU_MOREX_r3_2HG0191580
HORVU_MOREX_r3_5HG0510510
HORVU_MOREX_r3_4HG0408620
HORVU_MOREX_r3_3HG0315190
HORVU_MOREX_r3_5HG0428330
HORVU_MOREX_r3_2HG0183450
HORVU_MOREX_r3_5HG0522160
HORVU_MOREX_r3_7HG0686900
novel.720
HORVU_MOREX_r3_6HG0546550
HORVU_MOREX_r3_7HG0716640
HORVU_MOREX_r3_3HG0277690
HORVU_MOREX_r3_7HG0667730
HORVU_MOREX_r3_1HG0088960
HORVU_MOREX_r3_1HG0093060
HORVU_MOREX_r3_5HG0534280
HORVU_MOREX_r3_4HG0416920
HORVU_MOREX_r3_5HG0509070
HORVU_MOREX_r3_1HG0055360
HORVU_MOREX_r3_4HG0399470
HORVU_MOREX_r3_2HG0152530
HORVU_MOREX_r3_6HG0626440
HORVU_MOREX_r3_4HG0410300
HORVU_MOREX_r3_1HG0067010
HORVU_MOREX_r3_5HG0478010
HORVU_MOREX_r3_1HG0008640
HORVU_MOREX_r3_3HG0296310
novel.5558
HORVU_MOREX_r3_3HG0288000
novel.206
HORVU_MOREX_r3_7HG0749090
HORVU_MOREX_r3_5HG0537160
novel.2406
novel.4743
HORVU_MOREX_r3_5HG0485180
HORVU_MOREX_r3_3HG0257210
HORVU_MOREX_r3_5HG0481240
novel.424
novel.1370
HORVU_MOREX_r3_3HG0236310
novel.5976
HORVU_MOREX_r3_3HG0299110
HORVU_MOREX_r3_4HG0358390
HORVU_MOREX_r3_4HG0346960
HORVU_MOREX_r3_4HG0334120
HORVU_MOREX_r3_2HG0155790
HORVU_MOREX_r3_1HG0067890
HORVU_MOREX_r3_7HG0668440
HORVU_MOREX_r3_7HG0639380
HORVU_MOREX_r3_6HG0572410
novel.487
novel.3361
HORVU_MOREX_r3_4HG0344580
HORVU_MOREX_r3_4HG0347230
HORVU_MOREX_r3_6HG0540980
HORVU_MOREX_r3_2HG0188820
novel.6766
HORVU_MOREX_r3_6HG0547920
HORVU_MOREX_r3_2HG0185140
HORVU_MOREX_r3_5HG0531440
HORVU_MOREX_r3_2HG0133370
HORVU_MOREX_r3_7HG0749440
HORVU_MOREX_r3_2HG0153860
HORVU_MOREX_r3_2HG0098970
novel.541
HORVU_MOREX_r3_3HG0283290
HORVU_MOREX_r3_2HG0132270
HORVU_MOREX_r3_2HG0168610
HORVU_MOREX_r3_5HG0498010
HORVU_MOREX_r3_1HG0006660
HORVU_MOREX_r3_3HG0241530
HORVU_MOREX_r3_3HG0319350
HORVU_MOREX_r3_1HG0049980
HORVU_MOREX_r3_6HG0538440
novel.3945
HORVU_MOREX_r3_6HG0614470
HORVU_MOREX_r3_3HG0304120
HORVU_MOREX_r3_7HG0659400
HORVU_MOREX_r3_1HG0022910
novel.5591
HORVU_MOREX_r3_6HG0614350
novel.6416
HORVU_MOREX_r3_4HG0394950
HORVU_MOREX_r3_5HG0490710
HORVU_MOREX_r3_7HG0716850
novel.4118
HORVU_MOREX_r3_2HG0130770
HORVU_MOREX_r3_3HG0252960
HORVU_MOREX_r3_7HG0742960
HORVU_MOREX_r3_4HG0376960
HORVU_MOREX_r3_5HG0437090
HORVU_MOREX_r3_7HG0726260
HORVU_MOREX_r3_4HG0386830
HORVU_MOREX_r3_3HG0304270
HORVU_MOREX_r3_6HG0617930
HORVU_MOREX_r3_5HG0468940
HORVU_MOREX_r3_3HG0305800
HORVU_MOREX_r3_7HG0661950
novel.4005
HORVU_MOREX_r3_1HG0063810
HORVU_MOREX_r3_7HG0679350
HORVU_MOREX_r3_5HG0444270
novel.4121
HORVU_MOREX_r3_2HG0186780
HORVU_MOREX_r3_3HG0309780
novel.6065
novel.1117
novel.6393
HORVU_MOREX_r3_3HG0246170
HORVU_MOREX_r3_3HG0298020
HORVU_MOREX_r3_1HG0046210
HORVU_MOREX_r3_6HG0582050
HORVU_MOREX_r3_6HG0616960
HORVU_MOREX_r3_4HG0411590
HORVU_MOREX_r3_1HG0053660
HORVU_MOREX_r3_3HG0245320
novel.1374
HORVU_MOREX_r3_1HG0005750
HORVU_MOREX_r3_3HG0240960
HORVU_MOREX_r3_2HG0126000
HORVU_MOREX_r3_6HG0612910
HORVU_MOREX_r3_5HG0461970
HORVU_MOREX_r3_2HG0191880
novel.6734
HORVU_MOREX_r3_6HG0587290
HORVU_MOREX_r3_7HG0637290
HORVU_MOREX_r3_4HG0402650
HORVU_MOREX_r3_5HG0491320
HORVU_MOREX_r3_2HG0102500
HORVU_MOREX_r3_4HG0407520
novel.3079
HORVU_MOREX_r3_4HG0387610
HORVU_MOREX_r3_4HG0335960
HORVU_MOREX_r3_1HG0045370
HORVU_MOREX_r3_1HG0076070
HORVU_MOREX_r3_4HG0354610
HORVU_MOREX_r3_2HG0205510
HORVU_MOREX_r3_5HG0425080
HORVU_MOREX_r3_7HG0665140
HORVU_MOREX_r3_4HG0403790
novel.5918
HORVU_MOREX_r3_2HG0127550
HORVU_MOREX_r3_6HG0606810
HORVU_MOREX_r3_7HG0714980
HORVU_MOREX_r3_2HG0198790
HORVU_MOREX_r3_6HG0560140
HORVU_MOREX_r3_4HG0353940
HORVU_MOREX_r3_5HG0477590
HORVU_MOREX_r3_5HG0517110
novel.6697
HORVU_MOREX_r3_2HG0185070
HORVU_MOREX_r3_7HG0709150
HORVU_MOREX_r3_4HG0355390
HORVU_MOREX_r3_7HG0663690
novel.3509
HORVU_MOREX_r3_7HG0712740
HORVU_MOREX_r3_2HG0202730
HORVU_MOREX_r3_3HG0278710
HORVU_MOREX_r3_1HG0019160
HORVU_MOREX_r3_2HG0199370
HORVU_MOREX_r3_5HG0474930
HORVU_MOREX_r3_3HG0299760
HORVU_MOREX_r3_7HG0640950
HORVU_MOREX_r3_4HG0416400
HORVU_MOREX_r3_5HG0446040
HORVU_MOREX_r3_6HG0569540
HORVU_MOREX_r3_1HG0074980
HORVU_MOREX_r3_6HG0570820
HORVU_MOREX_r3_2HG0114510
HORVU_MOREX_r3_1HG0078020
HORVU_MOREX_r3_2HG0200690
HORVU_MOREX_r3_4HG0412730
HORVU_MOREX_r3_6HG0613030
HORVU_MOREX_r3_2HG0204350
HORVU_MOREX_r3_3HG0267230
novel.2858
HORVU_MOREX_r3_2HG0152170
HORVU_MOREX_r3_2HG0197540
HORVU_MOREX_r3_1HG0066850
HORVU_MOREX_r3_4HG0377080
HORVU_MOREX_r3_2HG0185000
novel.4594
HORVU_MOREX_r3_6HG0591930
HORVU_MOREX_r3_2HG0183390
HORVU_MOREX_r3_6HG0615130
HORVU_MOREX_r3_5HG0485500
HORVU_MOREX_r3_2HG0215900
HORVU_MOREX_r3_2HG0133180
HORVU_MOREX_r3_2HG0178480
HORVU_MOREX_r3_3HG0303550
HORVU_MOREX_r3_6HG0627020
HORVU_MOREX_r3_6HG0616980
HORVU_MOREX_r3_5HG0533810
HORVU_MOREX_r3_7HG0738570
HORVU_MOREX_r3_7HG0679360
HORVU_MOREX_r3_2HG0157300
novel.1779
HORVU_MOREX_r3_7HG0719410
novel.5845
HORVU_MOREX_r3_6HG0549370
HORVU_MOREX_r3_3HG0221900
HORVU_MOREX_r3_7HG0635350
HORVU_MOREX_r3_5HG0426220
HORVU_MOREX_r3_7HG0746360
HORVU_MOREX_r3_7HG0731940
HORVU_MOREX_r3_1HG0067160
HORVU_MOREX_r3_3HG0254990
HORVU_MOREX_r3_1HG0038750
HORVU_MOREX_r3_2HG0205420
HORVU_MOREX_r3_4HG0378000
HORVU_MOREX_r3_5HG0526590
HORVU_MOREX_r3_6HG0612270
HORVU_MOREX_r3_6HG0632090
HORVU_MOREX_r3_5HG0510590
HORVU_MOREX_r3_3HG0330820
HORVU_MOREX_r3_6HG0600660
HORVU_MOREX_r3_4HG0393080
novel.2755
HORVU_MOREX_r3_5HG0484020
novel.4673
HORVU_MOREX_r3_2HG0152330
novel.1142
novel.6397
HORVU_MOREX_r3_6HG0571680
HORVU_MOREX_r3_5HG0447830
HORVU_MOREX_r3_4HG0349450
HORVU_MOREX_r3_7HG0664380
HORVU_MOREX_r3_2HG0205530
HORVU_MOREX_r3_4HG0385040
HORVU_MOREX_r3_5HG0468510
HORVU_MOREX_r3_5HG0517170
HORVU_MOREX_r3_4HG0389360
HORVU_MOREX_r3_5HG0486800
HORVU_MOREX_r3_2HG0187990
novel.2473
HORVU_MOREX_r3_4HG0384560
HORVU_MOREX_r3_1HG0046890
HORVU_MOREX_r3_6HG0607130
HORVU_MOREX_r3_7HG0704400
novel.6704
HORVU_MOREX_r3_5HG0487320
novel.6340
HORVU_MOREX_r3_2HG0213640
HORVU_MOREX_r3_7HG0664460
HORVU_MOREX_r3_4HG0402090
HORVU_MOREX_r3_6HG0538500
HORVU_MOREX_r3_3HG0271660
HORVU_MOREX_r3_7HG0679960
HORVU_MOREX_r3_3HG0233200
HORVU_MOREX_r3_5HG0515030
HORVU_MOREX_r3_7HG0677070
HORVU_MOREX_r3_3HG0287560
HORVU_MOREX_r3_4HG0406150
HORVU_MOREX_r3_1HG0033590
novel.3595
novel.2608
HORVU_MOREX_r3_5HG0499440
HORVU_MOREX_r3_5HG0420630
HORVU_MOREX_r3_7HG0690090
novel.5511
HORVU_MOREX_r3_6HG0609420
HORVU_MOREX_r3_2HG0213660
novel.6268
HORVU_MOREX_r3_2HG0200430
HORVU_MOREX_r3_7HG0714620
novel.5122
novel.5164
HORVU_MOREX_r3_2HG0186400
HORVU_MOREX_r3_2HG0208280
HORVU_MOREX_r3_3HG0288050
HORVU_MOREX_r3_5HG0463370
HORVU_MOREX_r3_4HG0348190
novel.1184
HORVU_MOREX_r3_2HG0103160
HORVU_MOREX_r3_1HG0054070
HORVU_MOREX_r3_7HG0688310
HORVU_MOREX_r3_3HG0250170
HORVU_MOREX_r3_1HG0051090
HORVU_MOREX_r3_7HG0728850
HORVU_MOREX_r3_3HG0264770
HORVU_MOREX_r3_4HG0350680
HORVU_MOREX_r3_5HG0468740
novel.3046
HORVU_MOREX_r3_2HG0136460
novel.1009
HORVU_MOREX_r3_1HG0012520
HORVU_MOREX_r3_6HG0568910
HORVU_MOREX_r3_5HG0537370
HORVU_MOREX_r3_7HG0728760
HORVU_MOREX_r3_2HG0130590
HORVU_MOREX_r3_3HG0321090
HORVU_MOREX_r3_2HG0195300
HORVU_MOREX_r3_3HG0227700
HORVU_MOREX_r3_5HG0513980
novel.6247
HORVU_MOREX_r3_5HG0441760
HORVU_MOREX_r3_1HG0054280
HORVU_MOREX_r3_3HG0289930
HORVU_MOREX_r3_3HG0235850
HORVU_MOREX_r3_5HG0511500
HORVU_MOREX_r3_3HG0233990
HORVU_MOREX_r3_1HG0082550
HORVU_MOREX_r3_7HG0665880
HORVU_MOREX_r3_6HG0614570
novel.6201
HORVU_MOREX_r3_2HG0197130
novel.5833
HORVU_MOREX_r3_3HG0285210
HORVU_MOREX_r3_7HG0712390
HORVU_MOREX_r3_3HG0234240
novel.1782
novel.5758
HORVU_MOREX_r3_6HG0632850
HORVU_MOREX_r3_5HG0467150
HORVU_MOREX_r3_3HG0255580
novel.6613
HORVU_MOREX_r3_5HG0479670
HORVU_MOREX_r3_3HG0242150
HORVU_MOREX_r3_4HG0401920
HORVU_MOREX_r3_5HG0464070
HORVU_MOREX_r3_2HG0187890
HORVU_MOREX_r3_7HG0716330
HORVU_MOREX_r3_6HG0616950
novel.6801
HORVU_MOREX_r3_5HG0513890
HORVU_MOREX_r3_4HG0392120
HORVU_MOREX_r3_2HG0165250
novel.7286
HORVU_MOREX_r3_4HG0389480
HORVU_MOREX_r3_7HG0635360
novel.302
HORVU_MOREX_r3_1HG0092280
HORVU_MOREX_r3_1HG0011890
HORVU_MOREX_r3_2HG0173960
novel.5556
novel.1846
HORVU_MOREX_r3_3HG0298110
HORVU_MOREX_r3_1HG0076900
HORVU_MOREX_r3_5HG0485530
HORVU_MOREX_r3_2HG0213250
HORVU_MOREX_r3_6HG0634260
HORVU_MOREX_r3_7HG0693390
HORVU_MOREX_r3_5HG0433470
HORVU_MOREX_r3_7HG0691120
HORVU_MOREX_r3_6HG0620630
HORVU_MOREX_r3_1HG0041150
novel.5104
HORVU_MOREX_r3_7HG0665540
HORVU_MOREX_r3_7HG0716400
HORVU_MOREX_r3_3HG0288270
HORVU_MOREX_r3_2HG0183770
HORVU_MOREX_r3_1HG0085590
HORVU_MOREX_r3_4HG0362070
novel.2945
HORVU_MOREX_r3_5HG0537640
HORVU_MOREX_r3_1HG0041280
novel.5365
HORVU_MOREX_r3_1HG0056500
novel.963
novel.4443
HORVU_MOREX_r3_7HG0635170
HORVU_MOREX_r3_5HG0428300
HORVU_MOREX_r3_7HG0691850
novel.2751
HORVU_MOREX_r3_4HG0418720
novel.348
HORVU_MOREX_r3_3HG0230640
HORVU_MOREX_r3_5HG0470760
HORVU_MOREX_r3_3HG0225880
HORVU_MOREX_r3_6HG0538290
HORVU_MOREX_r3_3HG0314810
HORVU_MOREX_r3_2HG0126960
novel.6898
HORVU_MOREX_r3_5HG0520560
HORVU_MOREX_r3_7HG0661620
HORVU_MOREX_r3_4HG0418230
HORVU_MOREX_r3_5HG0527400
HORVU_MOREX_r3_1HG0048800
HORVU_MOREX_r3_6HG0574990
HORVU_MOREX_r3_3HG0218800
HORVU_MOREX_r3_1HG0029620
HORVU_MOREX_r3_6HG0575530
novel.2909
novel.324
HORVU_MOREX_r3_7HG0740250
novel.3882
HORVU_MOREX_r3_6HG0616140
HORVU_MOREX_r3_6HG0618180
HORVU_MOREX_r3_6HG0575680
novel.195
HORVU_MOREX_r3_6HG0625910
HORVU_MOREX_r3_7HG0651330
HORVU_MOREX_r3_1HG0076800
HORVU_MOREX_r3_5HG0522760
HORVU_MOREX_r3_1HG0052140
HORVU_MOREX_r3_5HG0483980
HORVU_MOREX_r3_2HG0180720
novel.2713
novel.2433
HORVU_MOREX_r3_2HG0168120
HORVU_MOREX_r3_3HG0300480
HORVU_MOREX_r3_2HG0196520
HORVU_MOREX_r3_3HG0256220
HORVU_MOREX_r3_3HG0218180
HORVU_MOREX_r3_4HG0333190
novel.4977
HORVU_MOREX_r3_2HG0203600
HORVU_MOREX_r3_6HG0564840
novel.2568
HORVU_MOREX_r3_1HG0057590
HORVU_MOREX_r3_3HG0221840
HORVU_MOREX_r3_5HG0482230
HORVU_MOREX_r3_7HG0658840
novel.2894
novel.496
HORVU_MOREX_r3_7HG0714960
HORVU_MOREX_r3_7HG0731640
novel.2534
HORVU_MOREX_r3_5HG0536210
HORVU_MOREX_r3_4HG0382510
HORVU_MOREX_r3_2HG0133450
HORVU_MOREX_r3_4HG0337820
HORVU_MOREX_r3_4HG0385030
HORVU_MOREX_r3_3HG0319900
HORVU_MOREX_r3_3HG0228870
HORVU_MOREX_r3_7HG0712450
novel.4782
HORVU_MOREX_r3_2HG0107710
HORVU_MOREX_r3_6HG0615750
HORVU_MOREX_r3_7HG0667360
HORVU_MOREX_r3_3HG0219790
HORVU_MOREX_r3_1HG0014410
novel.231
HORVU_MOREX_r3_4HG0389700
HORVU_MOREX_r3_5HG0482430
HORVU_MOREX_r3_2HG0172050
HORVU_MOREX_r3_3HG0314880
HORVU_MOREX_r3_5HG0425660
HORVU_MOREX_r3_2HG0166860
HORVU_MOREX_r3_4HG0334980
novel.3638
HORVU_MOREX_r3_4HG0389000
novel.3536
HORVU_MOREX_r3_6HG0619150
HORVU_MOREX_r3_4HG0391590
HORVU_MOREX_r3_5HG0471110
HORVU_MOREX_r3_7HG0736920
HORVU_MOREX_r3_3HG0227970
HORVU_MOREX_r3_5HG0522350
novel.416
novel.2606
HORVU_MOREX_r3_3HG0308560
HORVU_MOREX_r3_1HG0057960
HORVU_MOREX_r3_2HG0109800
novel.891
HORVU_MOREX_r3_6HG0564690
HORVU_MOREX_r3_3HG0307130
HORVU_MOREX_r3_4HG0349280
HORVU_MOREX_r3_5HG0490570
HORVU_MOREX_r3_3HG0312530
HORVU_MOREX_r3_4HG0408730
HORVU_MOREX_r3_4HG0331680
HORVU_MOREX_r3_2HG0178640
HORVU_MOREX_r3_2HG0128830
novel.2521
HORVU_MOREX_r3_3HG0225630
HORVU_MOREX_r3_5HG0524700
HORVU_MOREX_r3_6HG0546180
HORVU_MOREX_r3_2HG0185230
HORVU_MOREX_r3_1HG0048410
HORVU_MOREX_r3_1HG0041010
HORVU_MOREX_r3_5HG0512200
HORVU_MOREX_r3_3HG0269810
HORVU_MOREX_r3_2HG0104650
HORVU_MOREX_r3_3HG0248260
HORVU_MOREX_r3_3HG0329950
novel.2996
HORVU_MOREX_r3_5HG0505480
HORVU_MOREX_r3_6HG0593790
HORVU_MOREX_r3_2HG0133220
HORVU_MOREX_r3_1HG0079120
HORVU_MOREX_r3_3HG0285700
HORVU_MOREX_r3_4HG0388700
HORVU_MOREX_r3_4HG0344470
novel.3791
HORVU_MOREX_r3_1HG0087270
HORVU_MOREX_r3_2HG0185100
HORVU_MOREX_r3_1HG0051900
HORVU_MOREX_r3_1HG0066250
HORVU_MOREX_r3_6HG0605610
HORVU_MOREX_r3_3HG0221980
novel.1415
HORVU_MOREX_r3_2HG0107410
HORVU_MOREX_r3_7HG0637280
HORVU_MOREX_r3_1HG0077720
novel.5116
HORVU_MOREX_r3_5HG0476200
HORVU_MOREX_r3_3HG0266800
HORVU_MOREX_r3_5HG0497350
HORVU_MOREX_r3_2HG0198070
HORVU_MOREX_r3_2HG0185130
novel.2624
HORVU_MOREX_r3_1HG0041710
HORVU_MOREX_r3_3HG0295590
HORVU_MOREX_r3_3HG0315380
HORVU_MOREX_r3_5HG0487460
HORVU_MOREX_r3_6HG0608130
HORVU_MOREX_r3_3HG0302060
HORVU_MOREX_r3_3HG0289860
novel.7319
HORVU_MOREX_r3_3HG0282150
HORVU_MOREX_r3_7HG0671530
HORVU_MOREX_r3_2HG0161580
novel.3404
HORVU_MOREX_r3_3HG0218140
HORVU_MOREX_r3_5HG0423820
HORVU_MOREX_r3_7HG0649110
HORVU_MOREX_r3_6HG0592860
HORVU_MOREX_r3_4HG0418350
HORVU_MOREX_r3_6HG0560000
HORVU_MOREX_r3_5HG0423810
novel.3430
HORVU_MOREX_r3_6HG0599280
novel.2129
novel.1237
HORVU_MOREX_r3_2HG0157160
HORVU_MOREX_r3_5HG0462870
novel.5815
HORVU_MOREX_r3_5HG0517120
HORVU_MOREX_r3_3HG0273060
HORVU_MOREX_r3_4HG0416160
novel.557
HORVU_MOREX_r3_6HG0633810
HORVU_MOREX_r3_5HG0471860
HORVU_MOREX_r3_7HG0684990
HORVU_MOREX_r3_5HG0488570
HORVU_MOREX_r3_1HG0071260
HORVU_MOREX_r3_7HG0635370
HORVU_MOREX_r3_5HG0442770
HORVU_MOREX_r3_6HG0599200
novel.5863
HORVU_MOREX_r3_2HG0193490
HORVU_MOREX_r3_6HG0617380
HORVU_MOREX_r3_5HG0507230
HORVU_MOREX_r3_UnG0795720
HORVU_MOREX_r3_3HG0247650
HORVU_MOREX_r3_3HG0278490
HORVU_MOREX_r3_1HG0078890
HORVU_MOREX_r3_2HG0169370
HORVU_MOREX_r3_1HG0057490
novel.7292
HORVU_MOREX_r3_7HG0715120
HORVU_MOREX_r3_2HG0165490
HORVU_MOREX_r3_5HG0504770
HORVU_MOREX_r3_5HG0446790
HORVU_MOREX_r3_1HG0067260
HORVU_MOREX_r3_4HG0411270
HORVU_MOREX_r3_5HG0486610
HORVU_MOREX_r3_2HG0178210
HORVU_MOREX_r3_1HG0092410
HORVU_MOREX_r3_2HG0130740
HORVU_MOREX_r3_5HG0516310
HORVU_MOREX_r3_2HG0203380
HORVU_MOREX_r3_3HG0299250
HORVU_MOREX_r3_6HG0602210
HORVU_MOREX_r3_4HG0401710
HORVU_MOREX_r3_7HG0702360
novel.1319
HORVU_MOREX_r3_7HG0749940
HORVU_MOREX_r3_4HG0336550
novel.5594
HORVU_MOREX_r3_3HG0255420
HORVU_MOREX_r3_2HG0167220
HORVU_MOREX_r3_4HG0335910
HORVU_MOREX_r3_2HG0205000
HORVU_MOREX_r3_4HG0337460
novel.1783
HORVU_MOREX_r3_4HG0387550
HORVU_MOREX_r3_1HG0081340
HORVU_MOREX_r3_4HG0417320
HORVU_MOREX_r3_2HG0173400
HORVU_MOREX_r3_3HG0309880
HORVU_MOREX_r3_6HG0625570
HORVU_MOREX_r3_2HG0215760
HORVU_MOREX_r3_4HG0351750
HORVU_MOREX_r3_5HG0487290
novel.1435
novel.3314
HORVU_MOREX_r3_2HG0099160
HORVU_MOREX_r3_5HG0498150
HORVU_MOREX_r3_7HG0706600
HORVU_MOREX_r3_2HG0130600
HORVU_MOREX_r3_5HG0479680
HORVU_MOREX_r3_4HG0341300
HORVU_MOREX_r3_2HG0171750
novel.1107
HORVU_MOREX_r3_5HG0475700
novel.3169
HORVU_MOREX_r3_1HG0031310
HORVU_MOREX_r3_5HG0497900
HORVU_MOREX_r3_4HG0354080
novel.1921
HORVU_MOREX_r3_2HG0171180
HORVU_MOREX_r3_5HG0480330
HORVU_MOREX_r3_3HG0227370
novel.5180
HORVU_MOREX_r3_7HG0717060
HORVU_MOREX_r3_6HG0564510
HORVU_MOREX_r3_3HG0301960
HORVU_MOREX_r3_5HG0485210
HORVU_MOREX_r3_6HG0589800
HORVU_MOREX_r3_2HG0132590
HORVU_MOREX_r3_7HG0637200
HORVU_MOREX_r3_3HG0257140
novel.2194
HORVU_MOREX_r3_1HG0074730
HORVU_MOREX_r3_3HG0323650
HORVU_MOREX_r3_2HG0100230
HORVU_MOREX_r3_6HG0604000
HORVU_MOREX_r3_1HG0049600
HORVU_MOREX_r3_3HG0229730
HORVU_MOREX_r3_3HG0298680
HORVU_MOREX_r3_1HG0080180
HORVU_MOREX_r3_2HG0186020
novel.7357
novel.5322
HORVU_MOREX_r3_4HG0402000
HORVU_MOREX_r3_6HG0633570
HORVU_MOREX_r3_2HG0182460
novel.3129
HORVU_MOREX_r3_1HG0063750
HORVU_MOREX_r3_3HG0300920
novel.3192
HORVU_MOREX_r3_4HG0354490
HORVU_MOREX_r3_1HG0066260
HORVU_MOREX_r3_3HG0227360
HORVU_MOREX_r3_5HG0464580
novel.7092
HORVU_MOREX_r3_2HG0200060
HORVU_MOREX_r3_3HG0291040
HORVU_MOREX_r3_7HG0732570
HORVU_MOREX_r3_4HG0382790
HORVU_MOREX_r3_1HG0008080
novel.4359
HORVU_MOREX_r3_4HG0365080
HORVU_MOREX_r3_3HG0327170
HORVU_MOREX_r3_3HG0316890
HORVU_MOREX_r3_7HG0749680
novel.1091
HORVU_MOREX_r3_3HG0276340
HORVU_MOREX_r3_7HG0711020
HORVU_MOREX_r3_6HG0550770
HORVU_MOREX_r3_6HG0569310
HORVU_MOREX_r3_7HG0723200
HORVU_MOREX_r3_2HG0153470
HORVU_MOREX_r3_4HG0393610
HORVU_MOREX_r3_2HG0154170
HORVU_MOREX_r3_4HG0417850
HORVU_MOREX_r3_7HG0662830
HORVU_MOREX_r3_3HG0226110
HORVU_MOREX_r3_7HG0658350
HORVU_MOREX_r3_3HG0326490
novel.7155
HORVU_MOREX_r3_5HG0490900
HORVU_MOREX_r3_5HG0482670
HORVU_MOREX_r3_4HG0349940
HORVU_MOREX_r3_7HG0729100
HORVU_MOREX_r3_1HG0080310
HORVU_MOREX_r3_4HG0411820
HORVU_MOREX_r3_6HG0578310
HORVU_MOREX_r3_7HG0716430
HORVU_MOREX_r3_3HG0320750
novel.3351
HORVU_MOREX_r3_6HG0614650
HORVU_MOREX_r3_3HG0287840
novel.7220
HORVU_MOREX_r3_3HG0285900
novel.190
HORVU_MOREX_r3_2HG0119080
HORVU_MOREX_r3_4HG0341690
HORVU_MOREX_r3_7HG0664720
HORVU_MOREX_r3_2HG0173330
HORVU_MOREX_r3_4HG0392390
novel.7544
HORVU_MOREX_r3_3HG0267830
HORVU_MOREX_r3_1HG0067900
HORVU_MOREX_r3_1HG0083950
HORVU_MOREX_r3_7HG0667280
HORVU_MOREX_r3_6HG0629740
HORVU_MOREX_r3_4HG0403530
HORVU_MOREX_r3_1HG0049190
HORVU_MOREX_r3_3HG0218190
HORVU_MOREX_r3_1HG0065370
novel.7217
HORVU_MOREX_r3_5HG0488050
HORVU_MOREX_r3_3HG0267140
HORVU_MOREX_r3_6HG0569450
HORVU_MOREX_r3_3HG0226220
novel.3531
HORVU_MOREX_r3_4HG0379270
HORVU_MOREX_r3_2HG0177410
HORVU_MOREX_r3_5HG0533430
HORVU_MOREX_r3_7HG0746350
HORVU_MOREX_r3_4HG0354970
HORVU_MOREX_r3_1HG0068010
HORVU_MOREX_r3_3HG0294080
HORVU_MOREX_r3_5HG0473030
HORVU_MOREX_r3_7HG0718530
HORVU_MOREX_r3_3HG0305030
HORVU_MOREX_r3_4HG0389060
novel.1241
HORVU_MOREX_r3_3HG0250200
novel.4592
HORVU_MOREX_r3_2HG0196480
HORVU_MOREX_r3_6HG0605830
HORVU_MOREX_r3_4HG0336840
HORVU_MOREX_r3_5HG0492820
novel.3862
HORVU_MOREX_r3_5HG0490470
HORVU_MOREX_r3_4HG0391470
HORVU_MOREX_r3_6HG0596880
HORVU_MOREX_r3_4HG0379930
novel.1748
HORVU_MOREX_r3_3HG0294280
HORVU_MOREX_r3_3HG0298390
HORVU_MOREX_r3_3HG0246520
HORVU_MOREX_r3_3HG0304090
HORVU_MOREX_r3_4HG0359140
HORVU_MOREX_r3_1HG0062490
HORVU_MOREX_r3_6HG0577360
HORVU_MOREX_r3_7HG0676800
novel.2616
HORVU_MOREX_r3_7HG0728750
HORVU_MOREX_r3_7HG0679710
HORVU_MOREX_r3_2HG0116580
novel.7085
HORVU_MOREX_r3_7HG0668510
HORVU_MOREX_r3_2HG0212750
novel.2105
HORVU_MOREX_r3_2HG0111130
novel.2957
HORVU_MOREX_r3_1HG0019680
HORVU_MOREX_r3_2HG0116210
novel.7007
HORVU_MOREX_r3_4HG0391070
HORVU_MOREX_r3_3HG0304320
HORVU_MOREX_r3_1HG0000050
HORVU_MOREX_r3_7HG0677960
HORVU_MOREX_r3_3HG0295880
HORVU_MOREX_r3_3HG0236540
HORVU_MOREX_r3_5HG0507540
HORVU_MOREX_r3_2HG0188200
HORVU_MOREX_r3_2HG0181470
HORVU_MOREX_r3_3HG0306710
HORVU_MOREX_r3_6HG0538410
novel.7108
HORVU_MOREX_r3_5HG0513370
novel.1724
novel.7475
HORVU_MOREX_r3_7HG0741770
HORVU_MOREX_r3_1HG0091240
HORVU_MOREX_r3_4HG0411810
HORVU_MOREX_r3_2HG0121960
HORVU_MOREX_r3_7HG0687460
HORVU_MOREX_r3_5HG0420420
HORVU_MOREX_r3_2HG0217530
HORVU_MOREX_r3_1HG0079760
HORVU_MOREX_r3_5HG0485170
HORVU_MOREX_r3_2HG0203070
HORVU_MOREX_r3_5HG0500770
HORVU_MOREX_r3_1HG0063610
HORVU_MOREX_r3_7HG0705350
HORVU_MOREX_r3_5HG0471150
HORVU_MOREX_r3_5HG0431410
HORVU_MOREX_r3_1HG0032140
novel.5207
HORVU_MOREX_r3_5HG0537010
novel.3856
novel.309
HORVU_MOREX_r3_1HG0081100
HORVU_MOREX_r3_4HG0402070
novel.1306
novel.2777
HORVU_MOREX_r3_1HG0005830
HORVU_MOREX_r3_6HG0629340
HORVU_MOREX_r3_5HG0436950
novel.4138
HORVU_MOREX_r3_6HG0547660
HORVU_MOREX_r3_1HG0088790
HORVU_MOREX_r3_4HG0388270
HORVU_MOREX_r3_3HG0225500
HORVU_MOREX_r3_7HG0655670
HORVU_MOREX_r3_6HG0596190
HORVU_MOREX_r3_3HG0249580
HORVU_MOREX_r3_2HG0164550
HORVU_MOREX_r3_4HG0342880
HORVU_MOREX_r3_6HG0579680
HORVU_MOREX_r3_5HG0458550
HORVU_MOREX_r3_3HG0323320
HORVU_MOREX_r3_1HG0008140
HORVU_MOREX_r3_1HG0088330
novel.4369
HORVU_MOREX_r3_2HG0161240
HORVU_MOREX_r3_2HG0142250
HORVU_MOREX_r3_7HG0727100
HORVU_MOREX_r3_1HG0047910
HORVU_MOREX_r3_3HG0226130
HORVU_MOREX_r3_4HG0379300
HORVU_MOREX_r3_5HG0494550
HORVU_MOREX_r3_2HG0195600
HORVU_MOREX_r3_2HG0130420
HORVU_MOREX_r3_7HG0724870
HORVU_MOREX_r3_2HG0153750
HORVU_MOREX_r3_3HG0310780
HORVU_MOREX_r3_1HG0071130
HORVU_MOREX_r3_4HG0365190
HORVU_MOREX_r3_2HG0182210
HORVU_MOREX_r3_7HG0663940
HORVU_MOREX_r3_6HG0593780
HORVU_MOREX_r3_4HG0339430
HORVU_MOREX_r3_1HG0093700
HORVU_MOREX_r3_2HG0184130
HORVU_MOREX_r3_4HG0353600
HORVU_MOREX_r3_3HG0273340
novel.3681
HORVU_MOREX_r3_7HG0737490
HORVU_MOREX_r3_2HG0110840
novel.4007
novel.2332
HORVU_MOREX_r3_6HG0603090
novel.5901
HORVU_MOREX_r3_1HG0067700
HORVU_MOREX_r3_5HG0486620
HORVU_MOREX_r3_5HG0508730
novel.1236
HORVU_MOREX_r3_1HG0054010
HORVU_MOREX_r3_7HG0746230
HORVU_MOREX_r3_2HG0108550
HORVU_MOREX_r3_7HG0674790
novel.7436
HORVU_MOREX_r3_1HG0077620
HORVU_MOREX_r3_1HG0070000
HORVU_MOREX_r3_4HG0337240
HORVU_MOREX_r3_2HG0169260
HORVU_MOREX_r3_5HG0485910
novel.181
HORVU_MOREX_r3_7HG0725050
HORVU_MOREX_r3_1HG0058140
novel.1795
HORVU_MOREX_r3_2HG0140180
HORVU_MOREX_r3_5HG0500130
novel.2782
HORVU_MOREX_r3_2HG0180010
novel.7206
HORVU_MOREX_r3_6HG0538370
HORVU_MOREX_r3_2HG0099800
HORVU_MOREX_r3_5HG0486970
HORVU_MOREX_r3_2HG0136550
HORVU_MOREX_r3_7HG0644570
HORVU_MOREX_r3_2HG0129990
HORVU_MOREX_r3_6HG0627980
HORVU_MOREX_r3_2HG0113700
HORVU_MOREX_r3_2HG0154530
novel.5583
HORVU_MOREX_r3_5HG0500000
HORVU_MOREX_r3_4HG0354250
HORVU_MOREX_r3_2HG0121950
HORVU_MOREX_r3_3HG0312050
HORVU_MOREX_r3_5HG0456510
novel.3080
HORVU_MOREX_r3_5HG0481530
novel.7468
novel.5870
novel.5380
HORVU_MOREX_r3_3HG0289690
HORVU_MOREX_r3_4HG0356240
novel.2116
novel.3586
HORVU_MOREX_r3_3HG0303700
HORVU_MOREX_r3_4HG0404530
novel.7414
HORVU_MOREX_r3_2HG0176730
HORVU_MOREX_r3_2HG0113330
HORVU_MOREX_r3_7HG0708130
HORVU_MOREX_r3_5HG0481670
novel.4840
novel.2422
HORVU_MOREX_r3_7HG0743260
HORVU_MOREX_r3_1HG0059790
HORVU_MOREX_r3_6HG0631640
HORVU_MOREX_r3_2HG0183850
novel.378
HORVU_MOREX_r3_3HG0302120
novel.829
HORVU_MOREX_r3_7HG0738340
HORVU_MOREX_r3_1HG0067550
HORVU_MOREX_r3_5HG0430460
HORVU_MOREX_r3_2HG0173080
HORVU_MOREX_r3_4HG0332050
HORVU_MOREX_r3_7HG0683940
novel.1195
HORVU_MOREX_r3_1HG0052100
[truncated: 406 more rows]

## Sheet: YC85-PEG_vs_YC85-CK_Down
HORVU_MOREX_r3_6HG0605890
HORVU_MOREX_r3_5HG0442330
novel.2531
HORVU_MOREX_r3_1HG0051310
HORVU_MOREX_r3_7HG0727310
HORVU_MOREX_r3_2HG0196930
HORVU_MOREX_r3_4HG0336570
HORVU_MOREX_r3_1HG0064030
HORVU_MOREX_r3_6HG0605270
HORVU_MOREX_r3_5HG0509820
HORVU_MOREX_r3_4HG0391170
HORVU_MOREX_r3_3HG0329310
HORVU_MOREX_r3_6HG0577940
HORVU_MOREX_r3_5HG0423750
HORVU_MOREX_r3_6HG0540880
HORVU_MOREX_r3_2HG0203580
HORVU_MOREX_r3_7HG0676790
HORVU_MOREX_r3_4HG0411230
HORVU_MOREX_r3_2HG0209180
HORVU_MOREX_r3_2HG0170690
HORVU_MOREX_r3_7HG0730010
HORVU_MOREX_r3_3HG0325200
HORVU_MOREX_r3_7HG0702830
HORVU_MOREX_r3_7HG0746360
novel.2609
novel.6174
HORVU_MOREX_r3_4HG0336820
HORVU_MOREX_r3_3HG0291440
novel.7361
HORVU_MOREX_r3_4HG0358770
novel.1473
HORVU_MOREX_r3_4HG0409450
HORVU_MOREX_r3_1HG0027640
novel.3339
HORVU_MOREX_r3_5HG0500800
HORVU_MOREX_r3_2HG0208680
HORVU_MOREX_r3_3HG0301430
novel.5169
HORVU_MOREX_r3_3HG0290790
novel.7566
HORVU_MOREX_r3_2HG0172750
novel.5168
HORVU_MOREX_r3_1HG0081480
HORVU_MOREX_r3_2HG0205740
HORVU_MOREX_r3_2HG0196950
HORVU_MOREX_r3_2HG0199660
HORVU_MOREX_r3_7HG0721780
HORVU_MOREX_r3_1HG0080310
HORVU_MOREX_r3_7HG0661570
HORVU_MOREX_r3_7HG0726850
novel.2384
HORVU_MOREX_r3_3HG0233710
novel.7035
HORVU_MOREX_r3_2HG0188860
HORVU_MOREX_r3_6HG0607470
HORVU_MOREX_r3_2HG0136330
HORVU_MOREX_r3_4HG0389890
HORVU_MOREX_r3_5HG0476180
HORVU_MOREX_r3_3HG0327150
HORVU_MOREX_r3_2HG0135970
HORVU_MOREX_r3_4HG0338460
HORVU_MOREX_r3_3HG0324320
HORVU_MOREX_r3_4HG0402170
novel.5864
HORVU_MOREX_r3_1HG0093940
novel.5845
HORVU_MOREX_r3_7HG0664010
novel.579
HORVU_MOREX_r3_2HG0124820
HORVU_MOREX_r3_2HG0212170
HORVU_MOREX_r3_6HG0574950
HORVU_MOREX_r3_6HG0610180
HORVU_MOREX_r3_2HG0116530
HORVU_MOREX_r3_1HG0027490
HORVU_MOREX_r3_7HG0661070
HORVU_MOREX_r3_2HG0185490
HORVU_MOREX_r3_4HG0383510
HORVU_MOREX_r3_6HG0552540
novel.1501
HORVU_MOREX_r3_3HG0307300
HORVU_MOREX_r3_5HG0487460
HORVU_MOREX_r3_2HG0140970
HORVU_MOREX_r3_2HG0148840
novel.487
HORVU_MOREX_r3_2HG0181900
HORVU_MOREX_r3_6HG0547360
novel.5474
novel.3622
novel.4168
HORVU_MOREX_r3_2HG0209160
HORVU_MOREX_r3_2HG0191410
HORVU_MOREX_r3_5HG0520940
novel.3332
HORVU_MOREX_r3_7HG0723640
HORVU_MOREX_r3_7HG0746860
HORVU_MOREX_r3_3HG0297740
HORVU_MOREX_r3_5HG0491230
HORVU_MOREX_r3_3HG0325240
novel.2085
novel.3729
HORVU_MOREX_r3_7HG0677370
novel.4245
HORVU_MOREX_r3_6HG0551380
HORVU_MOREX_r3_5HG0504280
HORVU_MOREX_r3_4HG0343130
HORVU_MOREX_r3_2HG0202480
HORVU_MOREX_r3_2HG0212860
HORVU_MOREX_r3_2HG0099170
HORVU_MOREX_r3_2HG0181050
HORVU_MOREX_r3_1HG0057660
HORVU_MOREX_r3_3HG0319710
HORVU_MOREX_r3_2HG0115000
novel.4735
HORVU_MOREX_r3_3HG0251560
HORVU_MOREX_r3_7HG0733490
novel.2710
HORVU_MOREX_r3_5HG0463440
HORVU_MOREX_r3_1HG0072760
novel.2417
novel.6082
HORVU_MOREX_r3_5HG0482040
HORVU_MOREX_r3_7HG0709300
HORVU_MOREX_r3_3HG0325230
HORVU_MOREX_r3_2HG0138490
novel.3423
HORVU_MOREX_r3_3HG0224130
HORVU_MOREX_r3_5HG0478990
HORVU_MOREX_r3_6HG0625080
HORVU_MOREX_r3_1HG0073940
HORVU_MOREX_r3_4HG0391590
HORVU_MOREX_r3_6HG0603790
HORVU_MOREX_r3_1HG0029620
HORVU_MOREX_r3_3HG0291910
novel.2713
novel.3042
HORVU_MOREX_r3_7HG0728850
HORVU_MOREX_r3_6HG0618090
novel.4872
HORVU_MOREX_r3_7HG0730950
HORVU_MOREX_r3_7HG0727090
novel.223
HORVU_MOREX_r3_1HG0027650
HORVU_MOREX_r3_1HG0038160
novel.7544
HORVU_MOREX_r3_4HG0344270
HORVU_MOREX_r3_7HG0722160
HORVU_MOREX_r3_6HG0601410
novel.4942
HORVU_MOREX_r3_2HG0163740
HORVU_MOREX_r3_4HG0333320
HORVU_MOREX_r3_3HG0290240
HORVU_MOREX_r3_1HG0077190
HORVU_MOREX_r3_5HG0482580
HORVU_MOREX_r3_3HG0330820
HORVU_MOREX_r3_5HG0527780
novel.4319
HORVU_MOREX_r3_5HG0513830
novel.4624
HORVU_MOREX_r3_2HG0204560
novel.2793
novel.6243
novel.1435
HORVU_MOREX_r3_3HG0324180
HORVU_MOREX_r3_5HG0519690
HORVU_MOREX_r3_7HG0734280
HORVU_MOREX_r3_2HG0116050
novel.6356
HORVU_MOREX_r3_7HG0666740
HORVU_MOREX_r3_5HG0433240
HORVU_MOREX_r3_6HG0620540
HORVU_MOREX_r3_3HG0306130
novel.2845
HORVU_MOREX_r3_4HG0412910
HORVU_MOREX_r3_7HG0647190
novel.4191
HORVU_MOREX_r3_3HG0282710
HORVU_MOREX_r3_7HG0723260
HORVU_MOREX_r3_6HG0572180
HORVU_MOREX_r3_4HG0399990
HORVU_MOREX_r3_3HG0330150
novel.5445
novel.4438
HORVU_MOREX_r3_1HG0074350
HORVU_MOREX_r3_1HG0089900
HORVU_MOREX_r3_7HG0651930
novel.4467
HORVU_MOREX_r3_3HG0244130
HORVU_MOREX_r3_2HG0153860
HORVU_MOREX_r3_5HG0448300
novel.2761
novel.6525
novel.3570
novel.2864
HORVU_MOREX_r3_6HG0550760
HORVU_MOREX_r3_4HG0388700
HORVU_MOREX_r3_5HG0491150
HORVU_MOREX_r3_4HG0412610
HORVU_MOREX_r3_1HG0049060
novel.3659
HORVU_MOREX_r3_4HG0388810
novel.2794
HORVU_MOREX_r3_2HG0129990
HORVU_MOREX_r3_2HG0190600
HORVU_MOREX_r3_2HG0131920
HORVU_MOREX_r3_3HG0318700
HORVU_MOREX_r3_4HG0406580
HORVU_MOREX_r3_1HG0003620
HORVU_MOREX_r3_1HG0078690
HORVU_MOREX_r3_3HG0287050
HORVU_MOREX_r3_4HG0407520
HORVU_MOREX_r3_6HG0542750
HORVU_MOREX_r3_7HG0680430
HORVU_MOREX_r3_6HG0547920
HORVU_MOREX_r3_3HG0284720
HORVU_MOREX_r3_2HG0133180
novel.5901
HORVU_MOREX_r3_2HG0127370
novel.3361
HORVU_MOREX_r3_6HG0632520
HORVU_MOREX_r3_6HG0607050
HORVU_MOREX_r3_2HG0187860
HORVU_MOREX_r3_2HG0104820
HORVU_MOREX_r3_6HG0601160
novel.3185
novel.2608
novel.7402
novel.6305
HORVU_MOREX_r3_6HG0573350
novel.6245
HORVU_MOREX_r3_4HG0334500
HORVU_MOREX_r3_4HG0331520
HORVU_MOREX_r3_1HG0062900
HORVU_MOREX_r3_7HG0663070
novel.4568
HORVU_MOREX_r3_2HG0178080
HORVU_MOREX_r3_2HG0124520
HORVU_MOREX_r3_3HG0270100
HORVU_MOREX_r3_2HG0204260
HORVU_MOREX_r3_3HG0268820
novel.6862
novel.6379
novel.2193
novel.6639
novel.6299
HORVU_MOREX_r3_3HG0244330
HORVU_MOREX_r3_4HG0412460

## Sheet: YC85-PEG_vs_YC85-CK_Up
HORVU_MOREX_r3_3HG0286930
HORVU_MOREX_r3_4HG0347570
HORVU_MOREX_r3_3HG0302060
HORVU_MOREX_r3_2HG0200920
HORVU_MOREX_r3_6HG0599390
HORVU_MOREX_r3_1HG0080860
HORVU_MOREX_r3_2HG0139380
HORVU_MOREX_r3_3HG0284740
HORVU_MOREX_r3_4HG0331680
HORVU_MOREX_r3_7HG0665140
HORVU_MOREX_r3_2HG0211090
HORVU_MOREX_r3_4HG0404420
HORVU_MOREX_r3_3HG0319530
HORVU_MOREX_r3_2HG0187880
HORVU_MOREX_r3_5HG0507390
HORVU_MOREX_r3_3HG0294690
HORVU_MOREX_r3_5HG0423110
HORVU_MOREX_r3_1HG0067420
HORVU_MOREX_r3_1HG0073370
HORVU_MOREX_r3_6HG0622760
HORVU_MOREX_r3_5HG0504520
HORVU_MOREX_r3_6HG0570900
HORVU_MOREX_r3_7HG0742440
HORVU_MOREX_r3_6HG0541370
HORVU_MOREX_r3_1HG0090670
HORVU_MOREX_r3_2HG0199370
novel.1922
HORVU_MOREX_r3_4HG0399520
HORVU_MOREX_r3_5HG0423030
HORVU_MOREX_r3_7HG0637810
HORVU_MOREX_r3_4HG0398610
HORVU_MOREX_r3_4HG0334970
HORVU_MOREX_r3_2HG0128040
HORVU_MOREX_r3_1HG0080020
HORVU_MOREX_r3_5HG0427240
HORVU_MOREX_r3_7HG0745100
HORVU_MOREX_r3_5HG0437090
HORVU_MOREX_r3_5HG0447120
HORVU_MOREX_r3_4HG0380970
HORVU_MOREX_r3_4HG0394130
HORVU_MOREX_r3_4HG0335650
HORVU_MOREX_r3_5HG0465890
HORVU_MOREX_r3_3HG0227420
HORVU_MOREX_r3_6HG0618640
HORVU_MOREX_r3_2HG0138980
HORVU_MOREX_r3_1HG0063630
HORVU_MOREX_r3_2HG0153230
HORVU_MOREX_r3_3HG0270610
HORVU_MOREX_r3_5HG0486320
HORVU_MOREX_r3_6HG0617880
HORVU_MOREX_r3_7HG0634830
novel.1482
HORVU_MOREX_r3_7HG0708580
HORVU_MOREX_r3_2HG0123830
HORVU_MOREX_r3_1HG0044290
HORVU_MOREX_r3_2HG0199610
HORVU_MOREX_r3_6HG0578430
HORVU_MOREX_r3_7HG0708040
HORVU_MOREX_r3_3HG0218110
HORVU_MOREX_r3_5HG0511820
HORVU_MOREX_r3_2HG0195540
HORVU_MOREX_r3_3HG0298280
novel.5888
HORVU_MOREX_r3_6HG0627380
novel.1068
HORVU_MOREX_r3_3HG0305460
novel.207
HORVU_MOREX_r3_7HG0735770
HORVU_MOREX_r3_1HG0066620
HORVU_MOREX_r3_4HG0392320
HORVU_MOREX_r3_4HG0382640
HORVU_MOREX_r3_4HG0400710
HORVU_MOREX_r3_7HG0702510
novel.1127
HORVU_MOREX_r3_1HG0069480
HORVU_MOREX_r3_2HG0200780
HORVU_MOREX_r3_4HG0381110
HORVU_MOREX_r3_2HG0213970
HORVU_MOREX_r3_7HG0683600
HORVU_MOREX_r3_6HG0569310
HORVU_MOREX_r3_3HG0286890
HORVU_MOREX_r3_2HG0114680
HORVU_MOREX_r3_1HG0081980
HORVU_MOREX_r3_6HG0622770
HORVU_MOREX_r3_6HG0622790
HORVU_MOREX_r3_6HG0553820
HORVU_MOREX_r3_6HG0610800
HORVU_MOREX_r3_7HG0660080
HORVU_MOREX_r3_7HG0718900
HORVU_MOREX_r3_2HG0138340
HORVU_MOREX_r3_6HG0559440
HORVU_MOREX_r3_7HG0675510
HORVU_MOREX_r3_2HG0215610
HORVU_MOREX_r3_2HG0095500
HORVU_MOREX_r3_1HG0059740
HORVU_MOREX_r3_5HG0432540
HORVU_MOREX_r3_2HG0197000
HORVU_MOREX_r3_2HG0204020
HORVU_MOREX_r3_4HG0349450
HORVU_MOREX_r3_7HG0752900
HORVU_MOREX_r3_1HG0010450
HORVU_MOREX_r3_2HG0171890
HORVU_MOREX_r3_5HG0499340
HORVU_MOREX_r3_5HG0495560
HORVU_MOREX_r3_3HG0274110
HORVU_MOREX_r3_7HG0728500
HORVU_MOREX_r3_1HG0080870
HORVU_MOREX_r3_5HG0469740
HORVU_MOREX_r3_4HG0341400
HORVU_MOREX_r3_2HG0168900
HORVU_MOREX_r3_7HG0725530
HORVU_MOREX_r3_5HG0526600
HORVU_MOREX_r3_7HG0640990
HORVU_MOREX_r3_4HG0341390
HORVU_MOREX_r3_4HG0401580
HORVU_MOREX_r3_4HG0395840
HORVU_MOREX_r3_5HG0480430
HORVU_MOREX_r3_2HG0198490
HORVU_MOREX_r3_1HG0077120
HORVU_MOREX_r3_1HG0073870
HORVU_MOREX_r3_7HG0663270
HORVU_MOREX_r3_1HG0062330
HORVU_MOREX_r3_4HG0335340
HORVU_MOREX_r3_1HG0082230
HORVU_MOREX_r3_1HG0064920
HORVU_MOREX_r3_1HG0070370
HORVU_MOREX_r3_1HG0039240
HORVU_MOREX_r3_7HG0730410
HORVU_MOREX_r3_1HG0073580
HORVU_MOREX_r3_3HG0318720
HORVU_MOREX_r3_6HG0627020
HORVU_MOREX_r3_1HG0072060
HORVU_MOREX_r3_3HG0226600
HORVU_MOREX_r3_3HG0245440
novel.6161
HORVU_MOREX_r3_6HG0545930
HORVU_MOREX_r3_4HG0338860
HORVU_MOREX_r3_3HG0285860
HORVU_MOREX_r3_7HG0727370
HORVU_MOREX_r3_7HG0730230
HORVU_MOREX_r3_6HG0634000
HORVU_MOREX_r3_3HG0245420
HORVU_MOREX_r3_7HG0711550
HORVU_MOREX_r3_2HG0185100
HORVU_MOREX_r3_6HG0602880
HORVU_MOREX_r3_1HG0090130
HORVU_MOREX_r3_3HG0302160
novel.6821
HORVU_MOREX_r3_4HG0409470
HORVU_MOREX_r3_1HG0011790
HORVU_MOREX_r3_5HG0484020
HORVU_MOREX_r3_1HG0057490
HORVU_MOREX_r3_5HG0493090
HORVU_MOREX_r3_3HG0294880
HORVU_MOREX_r3_4HG0388460
HORVU_MOREX_r3_4HG0402930
HORVU_MOREX_r3_4HG0386900
HORVU_MOREX_r3_1HG0021960
HORVU_MOREX_r3_4HG0389000
novel.6518
HORVU_MOREX_r3_2HG0179790
HORVU_MOREX_r3_6HG0616340
HORVU_MOREX_r3_2HG0102650
HORVU_MOREX_r3_3HG0279280
HORVU_MOREX_r3_3HG0267730
HORVU_MOREX_r3_3HG0302180
HORVU_MOREX_r3_4HG0399030
HORVU_MOREX_r3_3HG0300280
HORVU_MOREX_r3_6HG0622430
HORVU_MOREX_r3_3HG0244980
HORVU_MOREX_r3_2HG0196540
novel.5072
HORVU_MOREX_r3_3HG0281980
novel.3103
HORVU_MOREX_r3_5HG0443100
HORVU_MOREX_r3_3HG0304510
HORVU_MOREX_r3_2HG0193660
HORVU_MOREX_r3_4HG0386490
HORVU_MOREX_r3_2HG0195500
HORVU_MOREX_r3_1HG0017420
HORVU_MOREX_r3_2HG0182090
HORVU_MOREX_r3_3HG0270810
HORVU_MOREX_r3_1HG0091150
HORVU_MOREX_r3_7HG0746540
HORVU_MOREX_r3_2HG0102720
HORVU_MOREX_r3_4HG0356870
HORVU_MOREX_r3_7HG0721200
HORVU_MOREX_r3_2HG0182080
HORVU_MOREX_r3_1HG0018620
HORVU_MOREX_r3_2HG0097650
HORVU_MOREX_r3_7HG0712100
HORVU_MOREX_r3_2HG0211850
HORVU_MOREX_r3_1HG0046460
HORVU_MOREX_r3_1HG0027330
HORVU_MOREX_r3_5HG0478050
HORVU_MOREX_r3_7HG0642100
HORVU_MOREX_r3_5HG0508150
HORVU_MOREX_r3_2HG0170290
HORVU_MOREX_r3_5HG0433660
HORVU_MOREX_r3_7HG0713280
HORVU_MOREX_r3_4HG0387610
HORVU_MOREX_r3_2HG0204970
HORVU_MOREX_r3_3HG0231410
HORVU_MOREX_r3_1HG0080620
HORVU_MOREX_r3_1HG0050330
HORVU_MOREX_r3_5HG0512370
HORVU_MOREX_r3_2HG0102640
HORVU_MOREX_r3_1HG0013270
HORVU_MOREX_r3_3HG0291840
HORVU_MOREX_r3_4HG0404390
HORVU_MOREX_r3_2HG0217490
HORVU_MOREX_r3_7HG0678210
HORVU_MOREX_r3_3HG0279950
HORVU_MOREX_r3_2HG0187450
HORVU_MOREX_r3_2HG0168120
HORVU_MOREX_r3_7HG0648480
HORVU_MOREX_r3_2HG0165490
HORVU_MOREX_r3_4HG0398060
novel.1397
novel.5863
HORVU_MOREX_r3_3HG0289810
HORVU_MOREX_r3_4HG0331920
novel.6129
HORVU_MOREX_r3_2HG0144830
novel.3540
HORVU_MOREX_r3_2HG0157890
HORVU_MOREX_r3_1HG0029360
HORVU_MOREX_r3_1HG0060630
novel.2056
HORVU_MOREX_r3_2HG0183600
HORVU_MOREX_r3_4HG0397570
HORVU_MOREX_r3_1HG0043530
HORVU_MOREX_r3_7HG0708730
HORVU_MOREX_r3_7HG0642910
novel.3581
novel.2910
novel.2933
HORVU_MOREX_r3_2HG0193650
HORVU_MOREX_r3_2HG0198150
HORVU_MOREX_r3_2HG0214130
HORVU_MOREX_r3_3HG0331020
HORVU_MOREX_r3_1HG0088480
novel.1277
HORVU_MOREX_r3_5HG0536610
HORVU_MOREX_r3_2HG0135310
HORVU_MOREX_r3_4HG0399240
novel.2530
novel.986
HORVU_MOREX_r3_7HG0685280
novel.5446
HORVU_MOREX_r3_1HG0090950
HORVU_MOREX_r3_3HG0291370
HORVU_MOREX_r3_2HG0113990
HORVU_MOREX_r3_4HG0346860
HORVU_MOREX_r3_7HG0677710
HORVU_MOREX_r3_1HG0048090
HORVU_MOREX_r3_4HG0399610
HORVU_MOREX_r3_5HG0424470
HORVU_MOREX_r3_5HG0462600
HORVU_MOREX_r3_2HG0159130
HORVU_MOREX_r3_7HG0654850
HORVU_MOREX_r3_6HG0622520
HORVU_MOREX_r3_5HG0479040
HORVU_MOREX_r3_6HG0632780
HORVU_MOREX_r3_5HG0431720
HORVU_MOREX_r3_4HG0412730
HORVU_MOREX_r3_1HG0011760
HORVU_MOREX_r3_4HG0398010
HORVU_MOREX_r3_6HG0541380
HORVU_MOREX_r3_2HG0102890
novel.5719
HORVU_MOREX_r3_3HG0223190
HORVU_MOREX_r3_3HG0291380
HORVU_MOREX_r3_5HG0528590
HORVU_MOREX_r3_6HG0630710
HORVU_MOREX_r3_6HG0547800
HORVU_MOREX_r3_5HG0516830
HORVU_MOREX_r3_5HG0487950
HORVU_MOREX_r3_7HG0685350
HORVU_MOREX_r3_1HG0058510
HORVU_MOREX_r3_6HG0538370
HORVU_MOREX_r3_1HG0080890
HORVU_MOREX_r3_7HG0726150
HORVU_MOREX_r3_6HG0620630
HORVU_MOREX_r3_5HG0515890
HORVU_MOREX_r3_2HG0124670
HORVU_MOREX_r3_3HG0226060
HORVU_MOREX_r3_6HG0619650
HORVU_MOREX_r3_4HG0402310
HORVU_MOREX_r3_7HG0749370
HORVU_MOREX_r3_1HG0058690
HORVU_MOREX_r3_4HG0341300
HORVU_MOREX_r3_1HG0093760
HORVU_MOREX_r3_7HG0674610
HORVU_MOREX_r3_1HG0044790
novel.7469
HORVU_MOREX_r3_6HG0617240
HORVU_MOREX_r3_2HG0203200
HORVU_MOREX_r3_7HG0724480
HORVU_MOREX_r3_3HG0281500
HORVU_MOREX_r3_1HG0046400
HORVU_MOREX_r3_2HG0183740
HORVU_MOREX_r3_7HG0667440
HORVU_MOREX_r3_5HG0473680
HORVU_MOREX_r3_7HG0667520
HORVU_MOREX_r3_3HG0269910
HORVU_MOREX_r3_2HG0174620
HORVU_MOREX_r3_1HG0009460
HORVU_MOREX_r3_4HG0390960
HORVU_MOREX_r3_1HG0080940
HORVU_MOREX_r3_3HG0309470
HORVU_MOREX_r3_1HG0071400
HORVU_MOREX_r3_7HG0648470
HORVU_MOREX_r3_3HG0226160
HORVU_MOREX_r3_1HG0021710
HORVU_MOREX_r3_7HG0744260
HORVU_MOREX_r3_3HG0267040
HORVU_MOREX_r3_3HG0242050
HORVU_MOREX_r3_5HG0479640
HORVU_MOREX_r3_3HG0292960
HORVU_MOREX_r3_2HG0132820
HORVU_MOREX_r3_3HG0307280
novel.987
novel.2438
HORVU_MOREX_r3_6HG0553460
HORVU_MOREX_r3_2HG0191770
HORVU_MOREX_r3_6HG0539560
HORVU_MOREX_r3_1HG0093520
HORVU_MOREX_r3_2HG0104610
HORVU_MOREX_r3_4HG0348190
HORVU_MOREX_r3_3HG0325820
HORVU_MOREX_r3_6HG0624530
HORVU_MOREX_r3_3HG0301990
HORVU_MOREX_r3_6HG0538380
HORVU_MOREX_r3_1HG0044490
HORVU_MOREX_r3_5HG0525290
novel.991
HORVU_MOREX_r3_5HG0499000
HORVU_MOREX_r3_6HG0559400
HORVU_MOREX_r3_4HG0405320
HORVU_MOREX_r3_7HG0720280
HORVU_MOREX_r3_2HG0216150
HORVU_MOREX_r3_1HG0027890
HORVU_MOREX_r3_3HG0233030
HORVU_MOREX_r3_6HG0610770
HORVU_MOREX_r3_1HG0081650
HORVU_MOREX_r3_1HG0090090
HORVU_MOREX_r3_2HG0174510
HORVU_MOREX_r3_3HG0281330
HORVU_MOREX_r3_7HG0744190
HORVU_MOREX_r3_1HG0059680
HORVU_MOREX_r3_7HG0741770
HORVU_MOREX_r3_4HG0334480
HORVU_MOREX_r3_2HG0130900
HORVU_MOREX_r3_7HG0712930
HORVU_MOREX_r3_6HG0557570
HORVU_MOREX_r3_3HG0219240
HORVU_MOREX_r3_6HG0612680
novel.2014
HORVU_MOREX_r3_3HG0233820
HORVU_MOREX_r3_7HG0697740
HORVU_MOREX_r3_5HG0482310
HORVU_MOREX_r3_6HG0545620
HORVU_MOREX_r3_1HG0051650
HORVU_MOREX_r3_7HG0743280
HORVU_MOREX_r3_1HG0073650
HORVU_MOREX_r3_1HG0040790
novel.3732
HORVU_MOREX_r3_1HG0075990
HORVU_MOREX_r3_3HG0282880
HORVU_MOREX_r3_3HG0276740
HORVU_MOREX_r3_7HG0654450
HORVU_MOREX_r3_1HG0014620
novel.6227
HORVU_MOREX_r3_6HG0578910
HORVU_MOREX_r3_1HG0071650
HORVU_MOREX_r3_2HG0153260
HORVU_MOREX_r3_7HG0733550
HORVU_MOREX_r3_2HG0159040
HORVU_MOREX_r3_3HG0286080
HORVU_MOREX_r3_5HG0463760
HORVU_MOREX_r3_3HG0302520
HORVU_MOREX_r3_6HG0574410
HORVU_MOREX_r3_2HG0103660
HORVU_MOREX_r3_2HG0103650
HORVU_MOREX_r3_6HG0621800
HORVU_MOREX_r3_6HG0567780
HORVU_MOREX_r3_2HG0107940
HORVU_MOREX_r3_3HG0291420
HORVU_MOREX_r3_3HG0281270
HORVU_MOREX_r3_4HG0331260
novel.1645
HORVU_MOREX_r3_3HG0222130
HORVU_MOREX_r3_3HG0234750
HORVU_MOREX_r3_1HG0000250
novel.7414
HORVU_MOREX_r3_7HG0662020
HORVU_MOREX_r3_7HG0671320
HORVU_MOREX_r3_2HG0097620
novel.1494
HORVU_MOREX_r3_6HG0617010
HORVU_MOREX_r3_1HG0029730
HORVU_MOREX_r3_4HG0413590
HORVU_MOREX_r3_1HG0046320
HORVU_MOREX_r3_3HG0225370
HORVU_MOREX_r3_5HG0445910
HORVU_MOREX_r3_2HG0139080
HORVU_MOREX_r3_6HG0569900
HORVU_MOREX_r3_3HG0220930
HORVU_MOREX_r3_3HG0290960
HORVU_MOREX_r3_5HG0495240
HORVU_MOREX_r3_3HG0322140
HORVU_MOREX_r3_2HG0125520
HORVU_MOREX_r3_1HG0069550
HORVU_MOREX_r3_6HG0539830
HORVU_MOREX_r3_1HG0017620
HORVU_MOREX_r3_6HG0603700
HORVU_MOREX_r3_5HG0475900
HORVU_MOREX_r3_7HG0748630
HORVU_MOREX_r3_2HG0116070
HORVU_MOREX_r3_3HG0312410
HORVU_MOREX_r3_5HG0519120
HORVU_MOREX_r3_3HG0229880
HORVU_MOREX_r3_5HG0501560
HORVU_MOREX_r3_7HG0687980
novel.4943
HORVU_MOREX_r3_2HG0172400
HORVU_MOREX_r3_1HG0083340
HORVU_MOREX_r3_6HG0613490
HORVU_MOREX_r3_5HG0527430
novel.6689
HORVU_MOREX_r3_2HG0104570
HORVU_MOREX_r3_3HG0235390
HORVU_MOREX_r3_5HG0520510
HORVU_MOREX_r3_2HG0192270
HORVU_MOREX_r3_2HG0167550
HORVU_MOREX_r3_2HG0207980
HORVU_MOREX_r3_1HG0063860
HORVU_MOREX_r3_2HG0155570
HORVU_MOREX_r3_7HG0730320
HORVU_MOREX_r3_7HG0676800
HORVU_MOREX_r3_1HG0093840
HORVU_MOREX_r3_2HG0199720
HORVU_MOREX_r3_7HG0660720
HORVU_MOREX_r3_5HG0527310
HORVU_MOREX_r3_1HG0060040
HORVU_MOREX_r3_2HG0204050
HORVU_MOREX_r3_1HG0090010
HORVU_MOREX_r3_4HG0346190
HORVU_MOREX_r3_7HG0663920
HORVU_MOREX_r3_2HG0122360
HORVU_MOREX_r3_2HG0195690
novel.6414
HORVU_MOREX_r3_1HG0046420
HORVU_MOREX_r3_6HG0618950
HORVU_MOREX_r3_7HG0740290
HORVU_MOREX_r3_5HG0496050
HORVU_MOREX_r3_4HG0392880
novel.5851
HORVU_MOREX_r3_5HG0444870
HORVU_MOREX_r3_6HG0612250
HORVU_MOREX_r3_1HG0030330
HORVU_MOREX_r3_1HG0049700
HORVU_MOREX_r3_1HG0064880
HORVU_MOREX_r3_1HG0025600
HORVU_MOREX_r3_3HG0225280
HORVU_MOREX_r3_4HG0339740
HORVU_MOREX_r3_2HG0216880
HORVU_MOREX_r3_4HG0406450
HORVU_MOREX_r3_1HG0049040
HORVU_MOREX_r3_3HG0311790
HORVU_MOREX_r3_1HG0077610
HORVU_MOREX_r3_3HG0235250
HORVU_MOREX_r3_6HG0606170
HORVU_MOREX_r3_5HG0494900
HORVU_MOREX_r3_5HG0504040
HORVU_MOREX_r3_5HG0463450
novel.304
HORVU_MOREX_r3_7HG0718190
HORVU_MOREX_r3_1HG0024210
novel.1945
HORVU_MOREX_r3_1HG0019970
HORVU_MOREX_r3_6HG0630640
novel.538
HORVU_MOREX_r3_1HG0086430
HORVU_MOREX_r3_5HG0494240
HORVU_MOREX_r3_5HG0489060
novel.7494
HORVU_MOREX_r3_5HG0510530
HORVU_MOREX_r3_5HG0490790
HORVU_MOREX_r3_4HG0403000
HORVU_MOREX_r3_2HG0105080
HORVU_MOREX_r3_5HG0429040
HORVU_MOREX_r3_1HG0090320
HORVU_MOREX_r3_7HG0711960
HORVU_MOREX_r3_7HG0750880
HORVU_MOREX_r3_5HG0479050
HORVU_MOREX_r3_4HG0384780
novel.7313
HORVU_MOREX_r3_7HG0644240
HORVU_MOREX_r3_4HG0385200
HORVU_MOREX_r3_2HG0172120
HORVU_MOREX_r3_6HG0574310
HORVU_MOREX_r3_6HG0596520
HORVU_MOREX_r3_7HG0666550
HORVU_MOREX_r3_2HG0148110
HORVU_MOREX_r3_5HG0510650
HORVU_MOREX_r3_6HG0565450
HORVU_MOREX_r3_1HG0062420
HORVU_MOREX_r3_3HG0330030
HORVU_MOREX_r3_2HG0183990
HORVU_MOREX_r3_7HG0736990
HORVU_MOREX_r3_1HG0090060
HORVU_MOREX_r3_5HG0531260
HORVU_MOREX_r3_7HG0719250
HORVU_MOREX_r3_6HG0616830
HORVU_MOREX_r3_2HG0155790
HORVU_MOREX_r3_1HG0069630
HORVU_MOREX_r3_2HG0200690
HORVU_MOREX_r3_3HG0283520
HORVU_MOREX_r3_7HG0673500
HORVU_MOREX_r3_4HG0336180
HORVU_MOREX_r3_7HG0737830
HORVU_MOREX_r3_3HG0226220
HORVU_MOREX_r3_7HG0729220
novel.5186
HORVU_MOREX_r3_2HG0126450
HORVU_MOREX_r3_7HG0744930
HORVU_MOREX_r3_1HG0073550
novel.339
HORVU_MOREX_r3_2HG0209220
HORVU_MOREX_r3_5HG0517140
HORVU_MOREX_r3_1HG0015720
HORVU_MOREX_r3_2HG0108920
HORVU_MOREX_r3_6HG0581810
HORVU_MOREX_r3_3HG0301520
HORVU_MOREX_r3_5HG0496820
HORVU_MOREX_r3_6HG0568570
HORVU_MOREX_r3_7HG0639890
HORVU_MOREX_r3_5HG0470150
HORVU_MOREX_r3_3HG0278190
HORVU_MOREX_r3_2HG0159100
HORVU_MOREX_r3_2HG0182690
HORVU_MOREX_r3_3HG0247870
HORVU_MOREX_r3_5HG0518280
HORVU_MOREX_r3_7HG0749680
HORVU_MOREX_r3_7HG0722560
HORVU_MOREX_r3_5HG0505950
HORVU_MOREX_r3_2HG0207110
HORVU_MOREX_r3_5HG0513190
HORVU_MOREX_r3_1HG0021970
HORVU_MOREX_r3_3HG0322340
HORVU_MOREX_r3_1HG0064870
HORVU_MOREX_r3_5HG0425920
HORVU_MOREX_r3_2HG0156450
HORVU_MOREX_r3_3HG0235010
HORVU_MOREX_r3_2HG0186870
HORVU_MOREX_r3_5HG0525340
HORVU_MOREX_r3_6HG0592430
HORVU_MOREX_r3_4HG0413320
HORVU_MOREX_r3_4HG0338360
novel.308
HORVU_MOREX_r3_1HG0024050
HORVU_MOREX_r3_7HG0729810
HORVU_MOREX_r3_2HG0153790
novel.7513
HORVU_MOREX_r3_6HG0543610
HORVU_MOREX_r3_2HG0193160
HORVU_MOREX_r3_1HG0070430
HORVU_MOREX_r3_3HG0236900
novel.2535
HORVU_MOREX_r3_5HG0474130
HORVU_MOREX_r3_5HG0465610
HORVU_MOREX_r3_2HG0187540
HORVU_MOREX_r3_5HG0512730
HORVU_MOREX_r3_4HG0396540
HORVU_MOREX_r3_2HG0127420
HORVU_MOREX_r3_3HG0300210
HORVU_MOREX_r3_4HG0384700
novel.6489
HORVU_MOREX_r3_2HG0194630
HORVU_MOREX_r3_1HG0063100
HORVU_MOREX_r3_7HG0709820
HORVU_MOREX_r3_2HG0127640
HORVU_MOREX_r3_5HG0484660
HORVU_MOREX_r3_5HG0424710
HORVU_MOREX_r3_6HG0590590
HORVU_MOREX_r3_7HG0732230
HORVU_MOREX_r3_3HG0264540
HORVU_MOREX_r3_7HG0657830
HORVU_MOREX_r3_2HG0127990
HORVU_MOREX_r3_2HG0201330
HORVU_MOREX_r3_7HG0658260
HORVU_MOREX_r3_7HG0648360
HORVU_MOREX_r3_3HG0298260
HORVU_MOREX_r3_2HG0208020
HORVU_MOREX_r3_1HG0076400
HORVU_MOREX_r3_5HG0465320
novel.4039
novel.1335
HORVU_MOREX_r3_6HG0614970
HORVU_MOREX_r3_7HG0677570
HORVU_MOREX_r3_7HG0683700
novel.338
HORVU_MOREX_r3_4HG0387510
novel.5199
HORVU_MOREX_r3_5HG0537660
HORVU_MOREX_r3_6HG0538350
HORVU_MOREX_r3_5HG0499010
HORVU_MOREX_r3_4HG0397640
HORVU_MOREX_r3_3HG0235640
HORVU_MOREX_r3_3HG0231420
HORVU_MOREX_r3_3HG0322580
novel.2732
HORVU_MOREX_r3_5HG0500010
HORVU_MOREX_r3_1HG0013970
novel.1931
HORVU_MOREX_r3_1HG0062700
HORVU_MOREX_r3_4HG0335790
HORVU_MOREX_r3_5HG0419600
HORVU_MOREX_r3_5HG0427440
HORVU_MOREX_r3_3HG0287850
HORVU_MOREX_r3_2HG0139230
HORVU_MOREX_r3_4HG0398550
HORVU_MOREX_r3_1HG0069240
HORVU_MOREX_r3_7HG0683040
HORVU_MOREX_r3_2HG0125630
HORVU_MOREX_r3_1HG0074140
HORVU_MOREX_r3_4HG0416150
HORVU_MOREX_r3_6HG0552610
HORVU_MOREX_r3_2HG0099640
HORVU_MOREX_r3_3HG0320700
HORVU_MOREX_r3_5HG0519240
HORVU_MOREX_r3_3HG0288960
HORVU_MOREX_r3_4HG0412490
HORVU_MOREX_r3_3HG0302230
HORVU_MOREX_r3_3HG0232120
HORVU_MOREX_r3_6HG0561260
HORVU_MOREX_r3_1HG0020850
HORVU_MOREX_r3_5HG0528060
HORVU_MOREX_r3_1HG0067270
novel.7042
HORVU_MOREX_r3_2HG0107680

## Sheet: YC88-PEG_vs_YC88-CK_Down
HORVU_MOREX_r3_5HG0528020
HORVU_MOREX_r3_5HG0478850
HORVU_MOREX_r3_1HG0092570
HORVU_MOREX_r3_1HG0064030
HORVU_MOREX_r3_1HG0076260
HORVU_MOREX_r3_1HG0039840
HORVU_MOREX_r3_4HG0342490
HORVU_MOREX_r3_3HG0227850
HORVU_MOREX_r3_2HG0173120
HORVU_MOREX_r3_7HG0657470
HORVU_MOREX_r3_1HG0089780
HORVU_MOREX_r3_3HG0227830
HORVU_MOREX_r3_2HG0135060
HORVU_MOREX_r3_1HG0069740
HORVU_MOREX_r3_4HG0342080
HORVU_MOREX_r3_6HG0611930
HORVU_MOREX_r3_2HG0112630
HORVU_MOREX_r3_7HG0709300
novel.1122
HORVU_MOREX_r3_4HG0336870
HORVU_MOREX_r3_7HG0642940
HORVU_MOREX_r3_2HG0138660
HORVU_MOREX_r3_3HG0304260
HORVU_MOREX_r3_4HG0409450
HORVU_MOREX_r3_3HG0299950
HORVU_MOREX_r3_3HG0228230
HORVU_MOREX_r3_1HG0055890
HORVU_MOREX_r3_1HG0078500
HORVU_MOREX_r3_1HG0053700
HORVU_MOREX_r3_6HG0544330
HORVU_MOREX_r3_6HG0613030
HORVU_MOREX_r3_2HG0182990
novel.7489
HORVU_MOREX_r3_7HG0709950
HORVU_MOREX_r3_5HG0535950
HORVU_MOREX_r3_6HG0616420
novel.1624
HORVU_MOREX_r3_3HG0288940
HORVU_MOREX_r3_2HG0195450
HORVU_MOREX_r3_5HG0464780
HORVU_MOREX_r3_5HG0420850
HORVU_MOREX_r3_2HG0122880
HORVU_MOREX_r3_7HG0746840
HORVU_MOREX_r3_3HG0291440
HORVU_MOREX_r3_1HG0021340
HORVU_MOREX_r3_3HG0245590
HORVU_MOREX_r3_2HG0161450
HORVU_MOREX_r3_1HG0089900
HORVU_MOREX_r3_4HG0400260
HORVU_MOREX_r3_5HG0491230
HORVU_MOREX_r3_5HG0512930
HORVU_MOREX_r3_5HG0535960
HORVU_MOREX_r3_1HG0083630
HORVU_MOREX_r3_5HG0430240
HORVU_MOREX_r3_5HG0490520
HORVU_MOREX_r3_2HG0209020
HORVU_MOREX_r3_5HG0502220
HORVU_MOREX_r3_4HG0336570
HORVU_MOREX_r3_3HG0247200
HORVU_MOREX_r3_7HG0746990
HORVU_MOREX_r3_5HG0431750
HORVU_MOREX_r3_3HG0308630
HORVU_MOREX_r3_7HG0746830
HORVU_MOREX_r3_5HG0502770
HORVU_MOREX_r3_7HG0651960
HORVU_MOREX_r3_5HG0504310
HORVU_MOREX_r3_3HG0220160
HORVU_MOREX_r3_1HG0089440
HORVU_MOREX_r3_1HG0039160
HORVU_MOREX_r3_1HG0070660
HORVU_MOREX_r3_5HG0492720
HORVU_MOREX_r3_2HG0208580
HORVU_MOREX_r3_3HG0303380
HORVU_MOREX_r3_1HG0010600
HORVU_MOREX_r3_2HG0184930
HORVU_MOREX_r3_7HG0704190
HORVU_MOREX_r3_4HG0342480
HORVU_MOREX_r3_7HG0709610
HORVU_MOREX_r3_6HG0553820
HORVU_MOREX_r3_2HG0183860
HORVU_MOREX_r3_7HG0705490
HORVU_MOREX_r3_7HG0687560
HORVU_MOREX_r3_2HG0114150
novel.5839
HORVU_MOREX_r3_5HG0444150
novel.6120
HORVU_MOREX_r3_5HG0520940
HORVU_MOREX_r3_2HG0099570
novel.6908
HORVU_MOREX_r3_4HG0410010
HORVU_MOREX_r3_1HG0002020
HORVU_MOREX_r3_2HG0112640
HORVU_MOREX_r3_3HG0252300
novel.991
HORVU_MOREX_r3_1HG0074760
HORVU_MOREX_r3_5HG0528600
HORVU_MOREX_r3_6HG0608990
HORVU_MOREX_r3_3HG0291380
HORVU_MOREX_r3_3HG0285660
HORVU_MOREX_r3_5HG0421580
HORVU_MOREX_r3_6HG0625710
HORVU_MOREX_r3_4HG0383820
HORVU_MOREX_r3_1HG0092550
HORVU_MOREX_r3_3HG0232960
HORVU_MOREX_r3_7HG0712940
HORVU_MOREX_r3_1HG0092560
HORVU_MOREX_r3_1HG0027950
HORVU_MOREX_r3_7HG0680870
HORVU_MOREX_r3_3HG0309300
HORVU_MOREX_r3_2HG0111480
HORVU_MOREX_r3_5HG0474460
HORVU_MOREX_r3_6HG0600090
HORVU_MOREX_r3_5HG0527460
novel.5142
HORVU_MOREX_r3_3HG0290860
HORVU_MOREX_r3_4HG0352200
HORVU_MOREX_r3_4HG0333320
HORVU_MOREX_r3_1HG0051310
HORVU_MOREX_r3_2HG0212050
HORVU_MOREX_r3_5HG0469700
HORVU_MOREX_r3_2HG0188160
HORVU_MOREX_r3_5HG0461170
HORVU_MOREX_r3_2HG0112720
HORVU_MOREX_r3_5HG0480040
HORVU_MOREX_r3_2HG0196660
HORVU_MOREX_r3_4HG0358620
HORVU_MOREX_r3_3HG0237360
HORVU_MOREX_r3_7HG0676790
HORVU_MOREX_r3_7HG0641120
HORVU_MOREX_r3_1HG0074260
HORVU_MOREX_r3_5HG0444140
HORVU_MOREX_r3_5HG0495530
HORVU_MOREX_r3_2HG0098890
HORVU_MOREX_r3_4HG0409010
HORVU_MOREX_r3_4HG0383800
HORVU_MOREX_r3_5HG0444200
HORVU_MOREX_r3_1HG0027640
HORVU_MOREX_r3_4HG0338460
HORVU_MOREX_r3_2HG0203580
HORVU_MOREX_r3_1HG0080370
HORVU_MOREX_r3_2HG0195390
novel.1476
HORVU_MOREX_r3_2HG0208500
HORVU_MOREX_r3_1HG0048080
HORVU_MOREX_r3_1HG0067580
HORVU_MOREX_r3_7HG0734200
HORVU_MOREX_r3_2HG0209560
HORVU_MOREX_r3_5HG0504280
HORVU_MOREX_r3_2HG0201340
HORVU_MOREX_r3_2HG0200390
HORVU_MOREX_r3_5HG0508720
novel.6907
HORVU_MOREX_r3_7HG0727800
HORVU_MOREX_r3_2HG0204700
HORVU_MOREX_r3_4HG0400580
HORVU_MOREX_r3_7HG0673430
HORVU_MOREX_r3_5HG0497680
HORVU_MOREX_r3_5HG0476020
HORVU_MOREX_r3_5HG0433250
HORVU_MOREX_r3_3HG0256190
HORVU_MOREX_r3_2HG0136830
HORVU_MOREX_r3_6HG0546340
HORVU_MOREX_r3_UnG0761010
HORVU_MOREX_r3_3HG0324070
HORVU_MOREX_r3_7HG0748530
HORVU_MOREX_r3_3HG0315350
HORVU_MOREX_r3_7HG0680850
novel.6403
HORVU_MOREX_r3_5HG0520390
HORVU_MOREX_r3_3HG0280890
HORVU_MOREX_r3_4HG0358340
HORVU_MOREX_r3_3HG0301110
HORVU_MOREX_r3_1HG0012730
novel.6652
novel.1785
HORVU_MOREX_r3_7HG0634930
HORVU_MOREX_r3_6HG0605940
HORVU_MOREX_r3_6HG0627380
HORVU_MOREX_r3_7HG0746860
HORVU_MOREX_r3_5HG0487860
HORVU_MOREX_r3_3HG0240640
HORVU_MOREX_r3_3HG0256430
novel.2182
HORVU_MOREX_r3_6HG0605860
HORVU_MOREX_r3_3HG0231810
HORVU_MOREX_r3_2HG0109330
HORVU_MOREX_r3_3HG0312090
HORVU_MOREX_r3_6HG0567430
HORVU_MOREX_r3_1HG0074350
HORVU_MOREX_r3_2HG0117530
HORVU_MOREX_r3_3HG0308800
HORVU_MOREX_r3_2HG0098930
HORVU_MOREX_r3_4HG0348850
HORVU_MOREX_r3_1HG0059710
HORVU_MOREX_r3_2HG0096980
novel.2730
HORVU_MOREX_r3_4HG0405390
HORVU_MOREX_r3_7HG0663970
HORVU_MOREX_r3_1HG0012480
novel.4623
HORVU_MOREX_r3_7HG0737960
novel.7167
HORVU_MOREX_r3_5HG0511930
HORVU_MOREX_r3_7HG0715130
HORVU_MOREX_r3_1HG0083920
HORVU_MOREX_r3_4HG0405650
HORVU_MOREX_r3_5HG0530810
HORVU_MOREX_r3_2HG0140970
HORVU_MOREX_r3_5HG0530780
novel.5118
HORVU_MOREX_r3_3HG0231800
HORVU_MOREX_r3_2HG0196120
HORVU_MOREX_r3_2HG0161720
HORVU_MOREX_r3_5HG0481600
HORVU_MOREX_r3_2HG0135900
HORVU_MOREX_r3_2HG0215250
HORVU_MOREX_r3_3HG0273390
HORVU_MOREX_r3_7HG0739110
HORVU_MOREX_r3_4HG0418110
HORVU_MOREX_r3_1HG0020190
HORVU_MOREX_r3_3HG0309220
HORVU_MOREX_r3_3HG0222390
HORVU_MOREX_r3_2HG0128300
HORVU_MOREX_r3_2HG0099170
HORVU_MOREX_r3_2HG0126460
HORVU_MOREX_r3_2HG0097700
HORVU_MOREX_r3_7HG0736060
HORVU_MOREX_r3_3HG0218760
HORVU_MOREX_r3_3HG0238370
HORVU_MOREX_r3_6HG0548710
HORVU_MOREX_r3_2HG0167350
HORVU_MOREX_r3_5HG0509820
HORVU_MOREX_r3_2HG0202280
HORVU_MOREX_r3_1HG0079930
HORVU_MOREX_r3_5HG0430130
HORVU_MOREX_r3_3HG0318390

## Sheet: YC88-PEG_vs_YC88-CK_Up
novel.3103
novel.1277
HORVU_MOREX_r3_4HG0334970
HORVU_MOREX_r3_4HG0389540
HORVU_MOREX_r3_5HG0465890
HORVU_MOREX_r3_4HG0339430
HORVU_MOREX_r3_7HG0637810
novel.1127
HORVU_MOREX_r3_3HG0264540
HORVU_MOREX_r3_4HG0415660
HORVU_MOREX_r3_5HG0508150
HORVU_MOREX_r3_2HG0155790
HORVU_MOREX_r3_4HG0387870
HORVU_MOREX_r3_7HG0661570
HORVU_MOREX_r3_7HG0752900
HORVU_MOREX_r3_5HG0467780
novel.206
novel.7185
HORVU_MOREX_r3_5HG0437090
HORVU_MOREX_r3_6HG0553460
HORVU_MOREX_r3_7HG0658560
HORVU_MOREX_r3_7HG0701080
HORVU_MOREX_r3_7HG0714440
HORVU_MOREX_r3_3HG0248140
HORVU_MOREX_r3_2HG0173410
HORVU_MOREX_r3_7HG0718270
HORVU_MOREX_r3_4HG0331680
novel.3505
HORVU_MOREX_r3_1HG0079120
HORVU_MOREX_r3_1HG0071400
HORVU_MOREX_r3_3HG0302180
HORVU_MOREX_r3_1HG0083730
HORVU_MOREX_r3_7HG0673630
HORVU_MOREX_r3_7HG0720280
novel.2418
novel.4387
HORVU_MOREX_r3_2HG0095500
novel.6098
novel.1922
novel.3540
HORVU_MOREX_r3_4HG0412730
novel.1397
HORVU_MOREX_r3_6HG0622710
HORVU_MOREX_r3_3HG0284740
novel.4765
HORVU_MOREX_r3_5HG0518010
HORVU_MOREX_r3_5HG0491070
HORVU_MOREX_r3_3HG0277760
HORVU_MOREX_r3_4HG0387610
HORVU_MOREX_r3_7HG0666440
HORVU_MOREX_r3_7HG0717870
HORVU_MOREX_r3_3HG0239080
HORVU_MOREX_r3_7HG0664380
HORVU_MOREX_r3_5HG0487300
HORVU_MOREX_r3_2HG0156460
HORVU_MOREX_r3_3HG0263560
HORVU_MOREX_r3_3HG0302120
HORVU_MOREX_r3_6HG0599390
novel.7135
HORVU_MOREX_r3_7HG0670160
novel.2909
HORVU_MOREX_r3_4HG0341490
HORVU_MOREX_r3_3HG0270610
HORVU_MOREX_r3_5HG0504520
HORVU_MOREX_r3_1HG0061070
HORVU_MOREX_r3_4HG0347570
HORVU_MOREX_r3_2HG0197540
HORVU_MOREX_r3_2HG0105150
HORVU_MOREX_r3_3HG0294880
novel.929
HORVU_MOREX_r3_6HG0563730
HORVU_MOREX_r3_4HG0379300
HORVU_MOREX_r3_2HG0211090
HORVU_MOREX_r3_1HG0025790
HORVU_MOREX_r3_4HG0338020
HORVU_MOREX_r3_7HG0749670
HORVU_MOREX_r3_4HG0335790
HORVU_MOREX_r3_2HG0213050
HORVU_MOREX_r3_5HG0486550
HORVU_MOREX_r3_2HG0170880
HORVU_MOREX_r3_4HG0402170
novel.3934
novel.2468
novel.672
novel.2976
HORVU_MOREX_r3_4HG0404420
novel.2438
HORVU_MOREX_r3_3HG0286890
novel.5061
HORVU_MOREX_r3_6HG0619650
novel.1317
HORVU_MOREX_r3_1HG0080860
HORVU_MOREX_r3_4HG0394460
HORVU_MOREX_r3_1HG0093520
HORVU_MOREX_r3_4HG0401980
HORVU_MOREX_r3_5HG0482430
HORVU_MOREX_r3_7HG0704160
HORVU_MOREX_r3_6HG0624130
HORVU_MOREX_r3_4HG0399660
HORVU_MOREX_r3_4HG0396100
HORVU_MOREX_r3_3HG0267000
HORVU_MOREX_r3_3HG0287610
HORVU_MOREX_r3_1HG0092170
HORVU_MOREX_r3_3HG0304500
HORVU_MOREX_r3_2HG0186340
HORVU_MOREX_r3_2HG0199370
HORVU_MOREX_r3_4HG0335910
HORVU_MOREX_r3_4HG0345760
novel.3275
HORVU_MOREX_r3_7HG0716520
HORVU_MOREX_r3_3HG0278270
HORVU_MOREX_r3_6HG0632170
HORVU_MOREX_r3_3HG0282170
HORVU_MOREX_r3_7HG0669530
novel.7091
HORVU_MOREX_r3_4HG0400710
HORVU_MOREX_r3_5HG0517290
HORVU_MOREX_r3_5HG0483980
novel.4909
HORVU_MOREX_r3_7HG0746230
novel.2451
novel.2354
novel.3559
HORVU_MOREX_r3_1HG0089140
HORVU_MOREX_r3_2HG0104580
HORVU_MOREX_r3_2HG0126880
novel.2142
novel.2765
HORVU_MOREX_r3_4HG0388940
HORVU_MOREX_r3_7HG0748900
novel.1830
HORVU_MOREX_r3_2HG0204020
HORVU_MOREX_r3_3HG0319670
HORVU_MOREX_r3_2HG0172790
HORVU_MOREX_r3_7HG0713940
HORVU_MOREX_r3_1HG0051650
HORVU_MOREX_r3_5HG0499210
HORVU_MOREX_r3_2HG0185140
HORVU_MOREX_r3_6HG0617930
novel.7357
HORVU_MOREX_r3_3HG0291410
HORVU_MOREX_r3_3HG0254810
novel.6321
novel.7212
novel.2360
HORVU_MOREX_r3_1HG0073550
novel.5889
HORVU_MOREX_r3_1HG0067260
novel.1027
HORVU_MOREX_r3_3HG0304230
novel.939
HORVU_MOREX_r3_4HG0411010
novel.364
HORVU_MOREX_r3_4HG0377010
HORVU_MOREX_r3_2HG0178050
HORVU_MOREX_r3_1HG0076420
HORVU_MOREX_r3_2HG0206550
HORVU_MOREX_r3_3HG0235010
novel.7414
HORVU_MOREX_r3_2HG0194790
HORVU_MOREX_r3_5HG0525010
novel.3938
novel.3667
HORVU_MOREX_r3_5HG0463760
HORVU_MOREX_r3_4HG0335960
novel.5723
HORVU_MOREX_r3_2HG0156450
novel.3426
HORVU_MOREX_r3_3HG0301990
HORVU_MOREX_r3_2HG0142300
novel.6613
HORVU_MOREX_r3_3HG0325680
novel.3611
novel.7169
HORVU_MOREX_r3_7HG0706830
HORVU_MOREX_r3_5HG0513190
HORVU_MOREX_r3_6HG0606110
HORVU_MOREX_r3_2HG0171580
HORVU_MOREX_r3_2HG0122090
HORVU_MOREX_r3_5HG0537360
novel.5488
HORVU_MOREX_r3_7HG0675490
HORVU_MOREX_r3_1HG0050190
HORVU_MOREX_r3_7HG0714720
HORVU_MOREX_r3_2HG0128030
HORVU_MOREX_r3_1HG0063430
HORVU_MOREX_r3_5HG0527270
novel.2059
HORVU_MOREX_r3_5HG0485170
HORVU_MOREX_r3_7HG0676900
HORVU_MOREX_r3_2HG0101480
novel.1180
HORVU_MOREX_r3_4HG0395940
HORVU_MOREX_r3_6HG0553180
HORVU_MOREX_r3_2HG0115850
HORVU_MOREX_r3_6HG0629340
HORVU_MOREX_r3_2HG0104760
novel.872
HORVU_MOREX_r3_3HG0286930
novel.4342
novel.488
HORVU_MOREX_r3_5HG0488660
novel.2559
HORVU_MOREX_r3_2HG0171740
HORVU_MOREX_r3_1HG0022790
HORVU_MOREX_r3_6HG0600930
HORVU_MOREX_r3_6HG0618630
HORVU_MOREX_r3_2HG0100390
novel.4449
HORVU_MOREX_r3_1HG0061140
HORVU_MOREX_r3_2HG0127540
HORVU_MOREX_r3_4HG0348190
HORVU_MOREX_r3_5HG0484320
novel.4983
novel.796
HORVU_MOREX_r3_7HG0708730
HORVU_MOREX_r3_7HG0712100
HORVU_MOREX_r3_4HG0391400
HORVU_MOREX_r3_5HG0528540
novel.7426
novel.1793
HORVU_MOREX_r3_1HG0077550
HORVU_MOREX_r3_3HG0248130
novel.5145
HORVU_MOREX_r3_5HG0510930
HORVU_MOREX_r3_3HG0259700
HORVU_MOREX_r3_4HG0341890
HORVU_MOREX_r3_3HG0237580
HORVU_MOREX_r3_3HG0224210
HORVU_MOREX_r3_1HG0050330
novel.4272
HORVU_MOREX_r3_2HG0118180
HORVU_MOREX_r3_3HG0292020
HORVU_MOREX_r3_4HG0415030
HORVU_MOREX_r3_3HG0227420
HORVU_MOREX_r3_7HG0693430
HORVU_MOREX_r3_7HG0702510
novel.6495
HORVU_MOREX_r3_3HG0297000
HORVU_MOREX_r3_7HG0718360
HORVU_MOREX_r3_3HG0276740
HORVU_MOREX_r3_7HG0732460
HORVU_MOREX_r3_1HG0020300
HORVU_MOREX_r3_3HG0294930
novel.5665
HORVU_MOREX_r3_5HG0502960
HORVU_MOREX_r3_3HG0264530
novel.4367
novel.1238
HORVU_MOREX_r3_2HG0194810
novel.6637
HORVU_MOREX_r3_5HG0488110
HORVU_MOREX_r3_1HG0013280
HORVU_MOREX_r3_2HG0185100
HORVU_MOREX_r3_6HG0569900
HORVU_MOREX_r3_1HG0014620
HORVU_MOREX_r3_1HG0070430
HORVU_MOREX_r3_6HG0554280
HORVU_MOREX_r3_1HG0058550
novel.7134
HORVU_MOREX_r3_1HG0083720
novel.996
HORVU_MOREX_r3_3HG0237550
HORVU_MOREX_r3_2HG0113040
HORVU_MOREX_r3_4HG0385210
novel.6829
HORVU_MOREX_r3_6HG0570900
novel.5534
novel.4080
HORVU_MOREX_r3_6HG0616130
novel.1964
HORVU_MOREX_r3_4HG0379640
novel.5256
HORVU_MOREX_r3_5HG0504320
novel.6677
HORVU_MOREX_r3_3HG0329830
HORVU_MOREX_r3_2HG0205320
HORVU_MOREX_r3_2HG0209260
novel.6219
HORVU_MOREX_r3_2HG0209220
HORVU_MOREX_r3_4HG0338270
HORVU_MOREX_r3_5HG0484090
novel.477
HORVU_MOREX_r3_5HG0526120
HORVU_MOREX_r3_4HG0333010
HORVU_MOREX_r3_2HG0181490
HORVU_MOREX_r3_4HG0379050
HORVU_MOREX_r3_3HG0304560
novel.3876
novel.6498
HORVU_MOREX_r3_6HG0613430
HORVU_MOREX_r3_1HG0081980
HORVU_MOREX_r3_6HG0627110
HORVU_MOREX_r3_7HG0663940
novel.721
novel.681
novel.5259
HORVU_MOREX_r3_1HG0068490
novel.5632
novel.2253
novel.3962
HORVU_MOREX_r3_5HG0528120
HORVU_MOREX_r3_3HG0246250
HORVU_MOREX_r3_4HG0337800
novel.4592
novel.3441
novel.214
novel.3672
HORVU_MOREX_r3_2HG0112440
HORVU_MOREX_r3_7HG0687380
HORVU_MOREX_r3_1HG0076570
HORVU_MOREX_r3_5HG0486970
HORVU_MOREX_r3_2HG0113860
HORVU_MOREX_r3_2HG0176040
novel.1008
HORVU_MOREX_r3_2HG0158470

## Sheet: ZY1100-PEG_vs_ZY1100-CK_Down
HORVU_MOREX_r3_4HG0409380
HORVU_MOREX_r3_5HG0497680
HORVU_MOREX_r3_5HG0513730
HORVU_MOREX_r3_3HG0304260
HORVU_MOREX_r3_2HG0152460
HORVU_MOREX_r3_7HG0752010
HORVU_MOREX_r3_4HG0387870
HORVU_MOREX_r3_3HG0281730
HORVU_MOREX_r3_2HG0131780
HORVU_MOREX_r3_3HG0299560
HORVU_MOREX_r3_5HG0528610
HORVU_MOREX_r3_2HG0198370
HORVU_MOREX_r3_1HG0021800
HORVU_MOREX_r3_5HG0492640
HORVU_MOREX_r3_7HG0660290
HORVU_MOREX_r3_1HG0010600
HORVU_MOREX_r3_2HG0184930
HORVU_MOREX_r3_5HG0536910
HORVU_MOREX_r3_6HG0605940
HORVU_MOREX_r3_6HG0618650
HORVU_MOREX_r3_1HG0089900
HORVU_MOREX_r3_1HG0091980
novel.5118
HORVU_MOREX_r3_7HG0729020
HORVU_MOREX_r3_6HG0599450
HORVU_MOREX_r3_6HG0544290
HORVU_MOREX_r3_7HG0643120
HORVU_MOREX_r3_7HG0642300
HORVU_MOREX_r3_6HG0617130
HORVU_MOREX_r3_5HG0500140
HORVU_MOREX_r3_4HG0340040
novel.1060
HORVU_MOREX_r3_1HG0048080
HORVU_MOREX_r3_4HG0413910
novel.4200
novel.5169
HORVU_MOREX_r3_3HG0290310
HORVU_MOREX_r3_5HG0503060
HORVU_MOREX_r3_5HG0424540
HORVU_MOREX_r3_1HG0083520
HORVU_MOREX_r3_4HG0353070
novel.5889
HORVU_MOREX_r3_2HG0198450
HORVU_MOREX_r3_1HG0021380
HORVU_MOREX_r3_1HG0000870
HORVU_MOREX_r3_4HG0391570
HORVU_MOREX_r3_7HG0736410
HORVU_MOREX_r3_4HG0410340
HORVU_MOREX_r3_7HG0642560
HORVU_MOREX_r3_4HG0333010
HORVU_MOREX_r3_7HG0748530
HORVU_MOREX_r3_6HG0542640
HORVU_MOREX_r3_2HG0204670
HORVU_MOREX_r3_1HG0019970
HORVU_MOREX_r3_7HG0704810
HORVU_MOREX_r3_5HG0523250
HORVU_MOREX_r3_3HG0318380
HORVU_MOREX_r3_5HG0448080
HORVU_MOREX_r3_1HG0068970
HORVU_MOREX_r3_7HG0657470
HORVU_MOREX_r3_6HG0591170
HORVU_MOREX_r3_2HG0196950
HORVU_MOREX_r3_5HG0495910
HORVU_MOREX_r3_3HG0318390
HORVU_MOREX_r3_2HG0112640
HORVU_MOREX_r3_2HG0198460
HORVU_MOREX_r3_5HG0517230
HORVU_MOREX_r3_7HG0636060
HORVU_MOREX_r3_7HG0674460
HORVU_MOREX_r3_7HG0721890
HORVU_MOREX_r3_1HG0054770
HORVU_MOREX_r3_1HG0008790
HORVU_MOREX_r3_2HG0201030
HORVU_MOREX_r3_2HG0182730
HORVU_MOREX_r3_7HG0687560
HORVU_MOREX_r3_2HG0122550
HORVU_MOREX_r3_2HG0127500
novel.3339
HORVU_MOREX_r3_7HG0751030
HORVU_MOREX_r3_7HG0657910
HORVU_MOREX_r3_4HG0409360
HORVU_MOREX_r3_6HG0620660
HORVU_MOREX_r3_2HG0201340
HORVU_MOREX_r3_6HG0545380
HORVU_MOREX_r3_6HG0567430
HORVU_MOREX_r3_1HG0057350
HORVU_MOREX_r3_4HG0383820
HORVU_MOREX_r3_1HG0064880
HORVU_MOREX_r3_7HG0655340
HORVU_MOREX_r3_7HG0668940
HORVU_MOREX_r3_2HG0215300
novel.4758
HORVU_MOREX_r3_2HG0115000
HORVU_MOREX_r3_2HG0185490
HORVU_MOREX_r3_1HG0079910
HORVU_MOREX_r3_4HG0380120
HORVU_MOREX_r3_5HG0470090
HORVU_MOREX_r3_1HG0057750
HORVU_MOREX_r3_2HG0181900
HORVU_MOREX_r3_5HG0538180
HORVU_MOREX_r3_2HG0124820
HORVU_MOREX_r3_6HG0627380
HORVU_MOREX_r3_2HG0126410
HORVU_MOREX_r3_7HG0662130
HORVU_MOREX_r3_3HG0308190
HORVU_MOREX_r3_2HG0111820
HORVU_MOREX_r3_6HG0615280
HORVU_MOREX_r3_2HG0205310
HORVU_MOREX_r3_4HG0383400
HORVU_MOREX_r3_7HG0639370
HORVU_MOREX_r3_4HG0333100
HORVU_MOREX_r3_4HG0394720
HORVU_MOREX_r3_5HG0490260
HORVU_MOREX_r3_7HG0651100
HORVU_MOREX_r3_1HG0062900
HORVU_MOREX_r3_2HG0168790
HORVU_MOREX_r3_6HG0612450
HORVU_MOREX_r3_4HG0411100
novel.1521
HORVU_MOREX_r3_4HG0402170
novel.5168
HORVU_MOREX_r3_3HG0296450
HORVU_MOREX_r3_5HG0524010
novel.4634
HORVU_MOREX_r3_7HG0723260
HORVU_MOREX_r3_1HG0026950
HORVU_MOREX_r3_6HG0570640
HORVU_MOREX_r3_6HG0617100
HORVU_MOREX_r3_3HG0286660
HORVU_MOREX_r3_2HG0131770
HORVU_MOREX_r3_3HG0283090
HORVU_MOREX_r3_2HG0198440
HORVU_MOREX_r3_2HG0208110
HORVU_MOREX_r3_5HG0466140
HORVU_MOREX_r3_1HG0027640
HORVU_MOREX_r3_2HG0099360
HORVU_MOREX_r3_2HG0198470
HORVU_MOREX_r3_3HG0266020
HORVU_MOREX_r3_1HG0064030
HORVU_MOREX_r3_4HG0350710
HORVU_MOREX_r3_2HG0104870
HORVU_MOREX_r3_5HG0516270
HORVU_MOREX_r3_7HG0664270
HORVU_MOREX_r3_2HG0097650
HORVU_MOREX_r3_4HG0339960
novel.3974
HORVU_MOREX_r3_2HG0209180
novel.2337
HORVU_MOREX_r3_1HG0019330
HORVU_MOREX_r3_4HG0334610
HORVU_MOREX_r3_1HG0060360
HORVU_MOREX_r3_3HG0309300
HORVU_MOREX_r3_4HG0332150
HORVU_MOREX_r3_3HG0290790
HORVU_MOREX_r3_6HG0543740
HORVU_MOREX_r3_2HG0169630
HORVU_MOREX_r3_5HG0473460
HORVU_MOREX_r3_2HG0104880
HORVU_MOREX_r3_1HG0051770
novel.4695
HORVU_MOREX_r3_5HG0476330
HORVU_MOREX_r3_2HG0112630
HORVU_MOREX_r3_7HG0645900
HORVU_MOREX_r3_7HG0740120
HORVU_MOREX_r3_4HG0400000
HORVU_MOREX_r3_5HG0432040
HORVU_MOREX_r3_6HG0574290
HORVU_MOREX_r3_6HG0599820
HORVU_MOREX_r3_1HG0009490
HORVU_MOREX_r3_1HG0076590
HORVU_MOREX_r3_7HG0719110
HORVU_MOREX_r3_1HG0069100
novel.2046
HORVU_MOREX_r3_2HG0197560
HORVU_MOREX_r3_1HG0061420
HORVU_MOREX_r3_7HG0729340
HORVU_MOREX_r3_3HG0280840
HORVU_MOREX_r3_7HG0709300
HORVU_MOREX_r3_1HG0076260
novel.4752
HORVU_MOREX_r3_6HG0617020
HORVU_MOREX_r3_7HG0653740
HORVU_MOREX_r3_5HG0487980
HORVU_MOREX_r3_7HG0729290
HORVU_MOREX_r3_3HG0241900
HORVU_MOREX_r3_5HG0510250
HORVU_MOREX_r3_7HG0746260
HORVU_MOREX_r3_6HG0575530
HORVU_MOREX_r3_4HG0390400
novel.7008
HORVU_MOREX_r3_1HG0009460
HORVU_MOREX_r3_2HG0104810
HORVU_MOREX_r3_7HG0659990
novel.980
HORVU_MOREX_r3_4HG0344940
HORVU_MOREX_r3_1HG0048090
HORVU_MOREX_r3_7HG0659120
HORVU_MOREX_r3_7HG0703460
HORVU_MOREX_r3_2HG0160240
HORVU_MOREX_r3_4HG0349640
HORVU_MOREX_r3_4HG0379080
HORVU_MOREX_r3_1HG0091990
HORVU_MOREX_r3_1HG0051870
novel.5142
HORVU_MOREX_r3_5HG0509820
novel.2131
HORVU_MOREX_r3_6HG0550840
HORVU_MOREX_r3_2HG0117210
HORVU_MOREX_r3_7HG0651390
HORVU_MOREX_r3_4HG0378680
HORVU_MOREX_r3_6HG0595250
HORVU_MOREX_r3_5HG0427650
HORVU_MOREX_r3_5HG0528600
HORVU_MOREX_r3_7HG0657440
HORVU_MOREX_r3_6HG0630920
HORVU_MOREX_r3_5HG0509270
HORVU_MOREX_r3_7HG0736780
HORVU_MOREX_r3_5HG0489810
HORVU_MOREX_r3_5HG0460290
HORVU_MOREX_r3_7HG0746860
HORVU_MOREX_r3_6HG0610970
HORVU_MOREX_r3_5HG0491230
HORVU_MOREX_r3_3HG0308480
HORVU_MOREX_r3_3HG0315350
HORVU_MOREX_r3_6HG0623120
HORVU_MOREX_r3_4HG0399620
HORVU_MOREX_r3_5HG0522100
HORVU_MOREX_r3_2HG0168310
HORVU_MOREX_r3_2HG0131150
HORVU_MOREX_r3_7HG0664700
HORVU_MOREX_r3_1HG0000250
HORVU_MOREX_r3_2HG0188160
HORVU_MOREX_r3_1HG0051310
HORVU_MOREX_r3_7HG0709440
HORVU_MOREX_r3_4HG0393390
HORVU_MOREX_r3_4HG0410020
HORVU_MOREX_r3_7HG0664810
HORVU_MOREX_r3_1HG0015520
HORVU_MOREX_r3_3HG0301110
HORVU_MOREX_r3_5HG0424740
HORVU_MOREX_r3_2HG0205740
novel.6533
novel.5433
HORVU_MOREX_r3_1HG0089780
HORVU_MOREX_r3_4HG0336820
novel.1634
HORVU_MOREX_r3_7HG0715010
HORVU_MOREX_r3_5HG0510240
HORVU_MOREX_r3_5HG0444140
HORVU_MOREX_r3_3HG0288370
HORVU_MOREX_r3_5HG0487600
HORVU_MOREX_r3_3HG0277190
HORVU_MOREX_r3_2HG0169710
HORVU_MOREX_r3_2HG0109700
HORVU_MOREX_r3_6HG0627340
HORVU_MOREX_r3_5HG0488970
HORVU_MOREX_r3_7HG0642030
HORVU_MOREX_r3_1HG0003720
HORVU_MOREX_r3_4HG0347380
HORVU_MOREX_r3_3HG0315260
HORVU_MOREX_r3_3HG0327790
HORVU_MOREX_r3_1HG0090770
HORVU_MOREX_r3_2HG0172400
HORVU_MOREX_r3_6HG0603010
HORVU_MOREX_r3_6HG0617070
HORVU_MOREX_r3_7HG0709580
HORVU_MOREX_r3_2HG0104760
HORVU_MOREX_r3_7HG0729380
HORVU_MOREX_r3_5HG0478650
HORVU_MOREX_r3_6HG0578690
novel.6314
novel.7510
novel.1428
HORVU_MOREX_r3_3HG0302610
HORVU_MOREX_r3_7HG0643110
HORVU_MOREX_r3_7HG0742210
HORVU_MOREX_r3_7HG0693590
HORVU_MOREX_r3_5HG0481830
HORVU_MOREX_r3_6HG0611930
HORVU_MOREX_r3_5HG0460160
HORVU_MOREX_r3_7HG0738120
novel.7056
HORVU_MOREX_r3_2HG0213220
HORVU_MOREX_r3_6HG0628660
HORVU_MOREX_r3_4HG0404910
HORVU_MOREX_r3_7HG0734470
HORVU_MOREX_r3_4HG0384590
HORVU_MOREX_r3_2HG0201330
novel.474
novel.1992
HORVU_MOREX_r3_1HG0071740
HORVU_MOREX_r3_5HG0476460
HORVU_MOREX_r3_UnG0753190
HORVU_MOREX_r3_2HG0177990
novel.5398
HORVU_MOREX_r3_6HG0631490
HORVU_MOREX_r3_6HG0561620
HORVU_MOREX_r3_7HG0737990
HORVU_MOREX_r3_6HG0612700
HORVU_MOREX_r3_1HG0071710
HORVU_MOREX_r3_7HG0675780
HORVU_MOREX_r3_1HG0014120
HORVU_MOREX_r3_3HG0273390
HORVU_MOREX_r3_2HG0204560
HORVU_MOREX_r3_1HG0074840
HORVU_MOREX_r3_3HG0312240
HORVU_MOREX_r3_3HG0305390
HORVU_MOREX_r3_3HG0241870
HORVU_MOREX_r3_5HG0433150
HORVU_MOREX_r3_6HG0617750
HORVU_MOREX_r3_3HG0299890
HORVU_MOREX_r3_5HG0526430
HORVU_MOREX_r3_1HG0089440
HORVU_MOREX_r3_5HG0444110
HORVU_MOREX_r3_3HG0330820
HORVU_MOREX_r3_7HG0651180
HORVU_MOREX_r3_1HG0012730
HORVU_MOREX_r3_7HG0680850
HORVU_MOREX_r3_5HG0486900
HORVU_MOREX_r3_2HG0178930
HORVU_MOREX_r3_6HG0617610
HORVU_MOREX_r3_3HG0284720
HORVU_MOREX_r3_7HG0720140
HORVU_MOREX_r3_2HG0188320
HORVU_MOREX_r3_3HG0238370
novel.2850
HORVU_MOREX_r3_7HG0660270
HORVU_MOREX_r3_7HG0638110
HORVU_MOREX_r3_3HG0291910
HORVU_MOREX_r3_2HG0097840
HORVU_MOREX_r3_7HG0636790
HORVU_MOREX_r3_5HG0444200
HORVU_MOREX_r3_1HG0048010
HORVU_MOREX_r3_5HG0502960
HORVU_MOREX_r3_5HG0465190
HORVU_MOREX_r3_4HG0406580
HORVU_MOREX_r3_3HG0301720
HORVU_MOREX_r3_7HG0666550
HORVU_MOREX_r3_4HG0342720
HORVU_MOREX_r3_7HG0736840
HORVU_MOREX_r3_7HG0668240
HORVU_MOREX_r3_6HG0547570
HORVU_MOREX_r3_3HG0274350
HORVU_MOREX_r3_6HG0633010
novel.3183
HORVU_MOREX_r3_4HG0409450
HORVU_MOREX_r3_7HG0709620
HORVU_MOREX_r3_6HG0547700
HORVU_MOREX_r3_5HG0423980
HORVU_MOREX_r3_6HG0549890
HORVU_MOREX_r3_7HG0718430
HORVU_MOREX_r3_7HG0672590
HORVU_MOREX_r3_5HG0476020
HORVU_MOREX_r3_1HG0067580
HORVU_MOREX_r3_4HG0340200
HORVU_MOREX_r3_2HG0215280
HORVU_MOREX_r3_1HG0053960
HORVU_MOREX_r3_2HG0208200
HORVU_MOREX_r3_1HG0041630
HORVU_MOREX_r3_4HG0381750
HORVU_MOREX_r3_6HG0615560
HORVU_MOREX_r3_6HG0629470
HORVU_MOREX_r3_3HG0285320
HORVU_MOREX_r3_1HG0058310
HORVU_MOREX_r3_4HG0409510
HORVU_MOREX_r3_7HG0637080
HORVU_MOREX_r3_4HG0384050
HORVU_MOREX_r3_2HG0095510
HORVU_MOREX_r3_1HG0074350
HORVU_MOREX_r3_6HG0592840
HORVU_MOREX_r3_3HG0305530
HORVU_MOREX_r3_6HG0629480
HORVU_MOREX_r3_5HG0480630
HORVU_MOREX_r3_5HG0481790
novel.7136
HORVU_MOREX_r3_5HG0430130
HORVU_MOREX_r3_4HG0334480
HORVU_MOREX_r3_4HG0387540
novel.2036
HORVU_MOREX_r3_2HG0214150
HORVU_MOREX_r3_3HG0224910
HORVU_MOREX_r3_2HG0209950
HORVU_MOREX_r3_5HG0530310
HORVU_MOREX_r3_6HG0613640
HORVU_MOREX_r3_6HG0551770
HORVU_MOREX_r3_3HG0236320
HORVU_MOREX_r3_1HG0092570
HORVU_MOREX_r3_7HG0714970
HORVU_MOREX_r3_2HG0104820
HORVU_MOREX_r3_5HG0495360
HORVU_MOREX_r3_5HG0530810
HORVU_MOREX_r3_4HG0397690
HORVU_MOREX_r3_5HG0463010
HORVU_MOREX_r3_4HG0400410
HORVU_MOREX_r3_7HG0744250
HORVU_MOREX_r3_1HG0040000
HORVU_MOREX_r3_5HG0508440
HORVU_MOREX_r3_4HG0356290
novel.5248
HORVU_MOREX_r3_7HG0723420
HORVU_MOREX_r3_2HG0106300
HORVU_MOREX_r3_1HG0080310
HORVU_MOREX_r3_2HG0098030
HORVU_MOREX_r3_6HG0577940
HORVU_MOREX_r3_3HG0240710
HORVU_MOREX_r3_5HG0514660
HORVU_MOREX_r3_6HG0552580
HORVU_MOREX_r3_1HG0089690
HORVU_MOREX_r3_1HG0052880
HORVU_MOREX_r3_5HG0476180
HORVU_MOREX_r3_5HG0474460
HORVU_MOREX_r3_6HG0627370
novel.5406
HORVU_MOREX_r3_7HG0653970
HORVU_MOREX_r3_1HG0071750
HORVU_MOREX_r3_5HG0473330
HORVU_MOREX_r3_4HG0415890
HORVU_MOREX_r3_4HG0342730
novel.5786
novel.6907
HORVU_MOREX_r3_6HG0561150
HORVU_MOREX_r3_5HG0420140
HORVU_MOREX_r3_6HG0547990
HORVU_MOREX_r3_5HG0499010
HORVU_MOREX_r3_1HG0084390
novel.6379
HORVU_MOREX_r3_2HG0183740
HORVU_MOREX_r3_5HG0461160
HORVU_MOREX_r3_3HG0316030
HORVU_MOREX_r3_4HG0344270
HORVU_MOREX_r3_6HG0551600
HORVU_MOREX_r3_2HG0204260
HORVU_MOREX_r3_1HG0091260
HORVU_MOREX_r3_7HG0648480
HORVU_MOREX_r3_2HG0185380
HORVU_MOREX_r3_7HG0648470
HORVU_MOREX_r3_5HG0430200
HORVU_MOREX_r3_3HG0226070
HORVU_MOREX_r3_3HG0236930
HORVU_MOREX_r3_6HG0613690
HORVU_MOREX_r3_2HG0119840
HORVU_MOREX_r3_2HG0110920
HORVU_MOREX_r3_7HG0720130
HORVU_MOREX_r3_7HG0650260
HORVU_MOREX_r3_2HG0104260

## Sheet: ZY1100-PEG_vs_ZY1100-CK_Up
HORVU_MOREX_r3_6HG0622770
novel.1922
HORVU_MOREX_r3_3HG0294690
HORVU_MOREX_r3_5HG0473680
HORVU_MOREX_r3_6HG0622760
HORVU_MOREX_r3_5HG0508150
HORVU_MOREX_r3_3HG0302060
HORVU_MOREX_r3_5HG0437090
HORVU_MOREX_r3_7HG0637810
HORVU_MOREX_r3_5HG0513190
HORVU_MOREX_r3_4HG0415030
novel.3540
HORVU_MOREX_r3_5HG0516830
HORVU_MOREX_r3_3HG0302180
HORVU_MOREX_r3_1HG0072060
HORVU_MOREX_r3_2HG0187880
HORVU_MOREX_r3_3HG0232910
HORVU_MOREX_r3_3HG0284740
HORVU_MOREX_r3_7HG0705460
HORVU_MOREX_r3_3HG0305460
HORVU_MOREX_r3_3HG0291420
HORVU_MOREX_r3_4HG0341390
HORVU_MOREX_r3_4HG0414960
HORVU_MOREX_r3_5HG0477620
HORVU_MOREX_r3_6HG0599390
HORVU_MOREX_r3_1HG0049040
HORVU_MOREX_r3_3HG0222380
HORVU_MOREX_r3_6HG0622790
HORVU_MOREX_r3_4HG0334970
HORVU_MOREX_r3_5HG0479050
HORVU_MOREX_r3_7HG0677710
HORVU_MOREX_r3_1HG0057490
HORVU_MOREX_r3_6HG0542030
HORVU_MOREX_r3_1HG0090670
HORVU_MOREX_r3_7HG0712930
HORVU_MOREX_r3_5HG0492510
HORVU_MOREX_r3_4HG0389000
HORVU_MOREX_r3_1HG0051650
novel.2597
HORVU_MOREX_r3_3HG0276740
HORVU_MOREX_r3_5HG0427240
HORVU_MOREX_r3_4HG0346270
HORVU_MOREX_r3_6HG0578430
HORVU_MOREX_r3_7HG0683600
HORVU_MOREX_r3_6HG0623140
HORVU_MOREX_r3_7HG0728580
HORVU_MOREX_r3_5HG0504520
HORVU_MOREX_r3_7HG0714940
HORVU_MOREX_r3_6HG0618950
HORVU_MOREX_r3_6HG0622520
HORVU_MOREX_r3_1HG0012520
HORVU_MOREX_r3_5HG0426410
HORVU_MOREX_r3_1HG0084120
HORVU_MOREX_r3_4HG0384790
HORVU_MOREX_r3_1HG0080890
HORVU_MOREX_r3_6HG0570900
HORVU_MOREX_r3_2HG0155790
HORVU_MOREX_r3_1HG0073870
HORVU_MOREX_r3_2HG0185980
HORVU_MOREX_r3_1HG0087910
HORVU_MOREX_r3_1HG0080860
HORVU_MOREX_r3_5HG0421310
HORVU_MOREX_r3_3HG0224850
HORVU_MOREX_r3_3HG0292960
HORVU_MOREX_r3_5HG0465890
HORVU_MOREX_r3_7HG0658550
HORVU_MOREX_r3_3HG0239970
novel.3651
HORVU_MOREX_r3_3HG0222410
HORVU_MOREX_r3_1HG0059680
HORVU_MOREX_r3_6HG0617740
HORVU_MOREX_r3_4HG0331680
HORVU_MOREX_r3_2HG0133420
HORVU_MOREX_r3_6HG0624540
HORVU_MOREX_r3_7HG0708040
HORVU_MOREX_r3_1HG0065130
HORVU_MOREX_r3_2HG0206860
HORVU_MOREX_r3_4HG0346860
HORVU_MOREX_r3_7HG0730340
HORVU_MOREX_r3_5HG0483990
HORVU_MOREX_r3_2HG0203620
novel.4342
HORVU_MOREX_r3_3HG0267730
novel.6172
HORVU_MOREX_r3_4HG0399940
HORVU_MOREX_r3_3HG0285860
HORVU_MOREX_r3_1HG0002470
HORVU_MOREX_r3_5HG0470680
HORVU_MOREX_r3_3HG0225240
HORVU_MOREX_r3_3HG0289810
HORVU_MOREX_r3_2HG0211680
HORVU_MOREX_r3_3HG0283640
HORVU_MOREX_r3_2HG0105400
HORVU_MOREX_r3_1HG0019230
novel.7357
HORVU_MOREX_r3_3HG0270610
HORVU_MOREX_r3_2HG0174510
HORVU_MOREX_r3_7HG0728500
HORVU_MOREX_r3_5HG0508630
HORVU_MOREX_r3_6HG0542040
HORVU_MOREX_r3_3HG0236190
HORVU_MOREX_r3_4HG0345090
HORVU_MOREX_r3_2HG0114390
HORVU_MOREX_r3_7HG0747080
novel.6524
HORVU_MOREX_r3_2HG0171580
HORVU_MOREX_r3_3HG0248140
novel.6821
HORVU_MOREX_r3_5HG0536610
HORVU_MOREX_r3_3HG0287930
HORVU_MOREX_r3_3HG0274110
HORVU_MOREX_r3_3HG0282880
HORVU_MOREX_r3_1HG0069460
HORVU_MOREX_r3_6HG0631420
HORVU_MOREX_r3_5HG0484060
HORVU_MOREX_r3_7HG0752900
HORVU_MOREX_r3_7HG0712700
HORVU_MOREX_r3_5HG0484070
HORVU_MOREX_r3_1HG0056620
HORVU_MOREX_r3_3HG0240960
HORVU_MOREX_r3_1HG0056600
HORVU_MOREX_r3_5HG0502720
HORVU_MOREX_r3_1HG0067550
HORVU_MOREX_r3_7HG0717870
HORVU_MOREX_r3_5HG0486320
HORVU_MOREX_r3_2HG0158120
HORVU_MOREX_r3_4HG0391310
HORVU_MOREX_r3_5HG0501160
novel.313
HORVU_MOREX_r3_3HG0314320
HORVU_MOREX_r3_2HG0201510
HORVU_MOREX_r3_7HG0713200
HORVU_MOREX_r3_6HG0619650
HORVU_MOREX_r3_5HG0484020
HORVU_MOREX_r3_5HG0497790
HORVU_MOREX_r3_6HG0539500
HORVU_MOREX_r3_1HG0090740
HORVU_MOREX_r3_1HG0063330
HORVU_MOREX_r3_7HG0677570
HORVU_MOREX_r3_2HG0217540
HORVU_MOREX_r3_7HG0722560
HORVU_MOREX_r3_4HG0403100
HORVU_MOREX_r3_4HG0347570
HORVU_MOREX_r3_4HG0410510
HORVU_MOREX_r3_4HG0415240
novel.2438
novel.1482
HORVU_MOREX_r3_1HG0037800
HORVU_MOREX_r3_5HG0492170
HORVU_MOREX_r3_1HG0081970
novel.5127
HORVU_MOREX_r3_1HG0090010
novel.7215
HORVU_MOREX_r3_6HG0630670
HORVU_MOREX_r3_2HG0124670
HORVU_MOREX_r3_3HG0302000
HORVU_MOREX_r3_7HG0740290
novel.3112
HORVU_MOREX_r3_3HG0298280
HORVU_MOREX_r3_7HG0669790
HORVU_MOREX_r3_2HG0105390
HORVU_MOREX_r3_1HG0027120
HORVU_MOREX_r3_2HG0102550
HORVU_MOREX_r3_7HG0665140
HORVU_MOREX_r3_4HG0352900
HORVU_MOREX_r3_5HG0513090
HORVU_MOREX_r3_2HG0200330
HORVU_MOREX_r3_5HG0528920
HORVU_MOREX_r3_4HG0400710
HORVU_MOREX_r3_5HG0526030
HORVU_MOREX_r3_5HG0489060
HORVU_MOREX_r3_2HG0199560
HORVU_MOREX_r3_6HG0624530
HORVU_MOREX_r3_6HG0617210
novel.5484
HORVU_MOREX_r3_1HG0083320
novel.2482
HORVU_MOREX_r3_7HG0712530
HORVU_MOREX_r3_3HG0285210
HORVU_MOREX_r3_2HG0105150
HORVU_MOREX_r3_3HG0236900
HORVU_MOREX_r3_7HG0682790
HORVU_MOREX_r3_2HG0174620
HORVU_MOREX_r3_5HG0480050
HORVU_MOREX_r3_6HG0542050
HORVU_MOREX_r3_2HG0185100
HORVU_MOREX_r3_7HG0675960
HORVU_MOREX_r3_4HG0413410
HORVU_MOREX_r3_5HG0502830
novel.6065
HORVU_MOREX_r3_1HG0072560
HORVU_MOREX_r3_2HG0200630
HORVU_MOREX_r3_3HG0264770
novel.304
HORVU_MOREX_r3_2HG0140720
HORVU_MOREX_r3_6HG0614970
HORVU_MOREX_r3_3HG0243610
HORVU_MOREX_r3_1HG0029730
HORVU_MOREX_r3_7HG0714400
HORVU_MOREX_r3_2HG0198710
novel.7185
HORVU_MOREX_r3_4HG0388440
HORVU_MOREX_r3_4HG0336940
HORVU_MOREX_r3_6HG0602880
HORVU_MOREX_r3_6HG0622710
HORVU_MOREX_r3_5HG0515720
HORVU_MOREX_r3_7HG0649960
HORVU_MOREX_r3_7HG0701980
HORVU_MOREX_r3_7HG0732710
novel.3532
HORVU_MOREX_r3_4HG0341300
HORVU_MOREX_r3_5HG0422930
HORVU_MOREX_r3_4HG0387070
HORVU_MOREX_r3_2HG0194770
HORVU_MOREX_r3_7HG0644480
HORVU_MOREX_r3_2HG0196390
HORVU_MOREX_r3_2HG0119270
HORVU_MOREX_r3_3HG0286890
HORVU_MOREX_r3_5HG0488640
HORVU_MOREX_r3_3HG0304970
HORVU_MOREX_r3_2HG0121300
HORVU_MOREX_r3_3HG0319810
HORVU_MOREX_r3_4HG0380970
HORVU_MOREX_r3_4HG0371500
HORVU_MOREX_r3_2HG0190750
HORVU_MOREX_r3_1HG0042110
HORVU_MOREX_r3_1HG0071050
novel.6023
HORVU_MOREX_r3_2HG0209470
HORVU_MOREX_r3_3HG0275490
HORVU_MOREX_r3_5HG0472040
HORVU_MOREX_r3_4HG0383920
HORVU_MOREX_r3_1HG0070430
HORVU_MOREX_r3_4HG0341400
HORVU_MOREX_r3_7HG0721840
HORVU_MOREX_r3_5HG0447150
HORVU_MOREX_r3_7HG0715950
HORVU_MOREX_r3_1HG0091020
HORVU_MOREX_r3_5HG0429390
HORVU_MOREX_r3_1HG0074000
HORVU_MOREX_r3_5HG0487680
HORVU_MOREX_r3_6HG0594100
HORVU_MOREX_r3_6HG0624600
HORVU_MOREX_r3_3HG0228790
HORVU_MOREX_r3_2HG0105550
HORVU_MOREX_r3_4HG0342540
HORVU_MOREX_r3_5HG0517770
HORVU_MOREX_r3_2HG0179790
HORVU_MOREX_r3_3HG0275170
HORVU_MOREX_r3_6HG0615750
HORVU_MOREX_r3_2HG0111380
HORVU_MOREX_r3_3HG0324410
HORVU_MOREX_r3_2HG0174080
HORVU_MOREX_r3_6HG0567100
HORVU_MOREX_r3_2HG0186340
HORVU_MOREX_r3_4HG0409470
HORVU_MOREX_r3_3HG0254920
novel.3164
HORVU_MOREX_r3_5HG0513370
HORVU_MOREX_r3_7HG0685230
HORVU_MOREX_r3_1HG0090950
novel.4066
HORVU_MOREX_r3_7HG0729030
novel.1127
HORVU_MOREX_r3_2HG0159010
HORVU_MOREX_r3_6HG0619890
HORVU_MOREX_r3_2HG0122360
HORVU_MOREX_r3_1HG0067090
HORVU_MOREX_r3_6HG0620340
HORVU_MOREX_r3_6HG0557920
HORVU_MOREX_r3_5HG0427920
HORVU_MOREX_r3_4HG0357630
HORVU_MOREX_r3_2HG0099810
HORVU_MOREX_r3_1HG0083610
HORVU_MOREX_r3_3HG0275090
HORVU_MOREX_r3_1HG0021710
HORVU_MOREX_r3_4HG0349080
HORVU_MOREX_r3_4HG0402900
HORVU_MOREX_r3_7HG0641840
HORVU_MOREX_r3_1HG0036440
HORVU_MOREX_r3_3HG0296180
HORVU_MOREX_r3_6HG0617240
HORVU_MOREX_r3_4HG0337460
HORVU_MOREX_r3_7HG0747330
HORVU_MOREX_r3_3HG0297700
HORVU_MOREX_r3_6HG0606520
HORVU_MOREX_r3_6HG0552470
HORVU_MOREX_r3_5HG0509760
HORVU_MOREX_r3_1HG0026010
HORVU_MOREX_r3_2HG0106350
HORVU_MOREX_r3_6HG0546180
HORVU_MOREX_r3_3HG0267000
HORVU_MOREX_r3_4HG0335960
HORVU_MOREX_r3_7HG0712100
HORVU_MOREX_r3_3HG0253950
HORVU_MOREX_r3_5HG0505980
HORVU_MOREX_r3_3HG0323320
HORVU_MOREX_r3_1HG0054580
novel.5474
HORVU_MOREX_r3_4HG0335790
HORVU_MOREX_r3_7HG0669780
HORVU_MOREX_r3_6HG0572740
HORVU_MOREX_r3_4HG0337040
HORVU_MOREX_r3_6HG0599330
novel.1579
HORVU_MOREX_r3_1HG0056570
HORVU_MOREX_r3_6HG0613230
HORVU_MOREX_r3_2HG0168570
HORVU_MOREX_r3_1HG0008440
HORVU_MOREX_r3_1HG0059740
HORVU_MOREX_r3_2HG0205420
HORVU_MOREX_r3_2HG0201500
HORVU_MOREX_r3_7HG0675420
HORVU_MOREX_r3_7HG0676800
HORVU_MOREX_r3_1HG0077840
HORVU_MOREX_r3_2HG0157300
HORVU_MOREX_r3_3HG0225550
HORVU_MOREX_r3_7HG0747720
HORVU_MOREX_r3_4HG0353560
novel.3351
HORVU_MOREX_r3_5HG0491360
HORVU_MOREX_r3_4HG0366210
HORVU_MOREX_r3_4HG0335910
HORVU_MOREX_r3_3HG0322520
HORVU_MOREX_r3_3HG0310800
HORVU_MOREX_r3_1HG0027930
HORVU_MOREX_r3_7HG0658900
HORVU_MOREX_r3_3HG0289630
HORVU_MOREX_r3_1HG0050330
HORVU_MOREX_r3_4HG0397570
HORVU_MOREX_r3_5HG0533740
HORVU_MOREX_r3_1HG0002670
HORVU_MOREX_r3_7HG0726050
HORVU_MOREX_r3_7HG0681470
HORVU_MOREX_r3_2HG0149820
HORVU_MOREX_r3_6HG0610800
HORVU_MOREX_r3_3HG0238260
HORVU_MOREX_r3_2HG0133450
HORVU_MOREX_r3_6HG0548930
HORVU_MOREX_r3_2HG0156450
HORVU_MOREX_r3_3HG0296310
HORVU_MOREX_r3_5HG0527050
HORVU_MOREX_r3_3HG0312410
HORVU_MOREX_r3_3HG0256040
HORVU_MOREX_r3_2HG0176310
HORVU_MOREX_r3_7HG0715890
HORVU_MOREX_r3_6HG0616850
HORVU_MOREX_r3_2HG0195440
HORVU_MOREX_r3_5HG0463760
HORVU_MOREX_r3_5HG0485790
HORVU_MOREX_r3_6HG0625830
HORVU_MOREX_r3_1HG0002020
HORVU_MOREX_r3_2HG0140970
HORVU_MOREX_r3_4HG0381680
HORVU_MOREX_r3_5HG0524440
novel.988
HORVU_MOREX_r3_6HG0544350
novel.5323
HORVU_MOREX_r3_2HG0126960
novel.2789
HORVU_MOREX_r3_4HG0394980
novel.4649
HORVU_MOREX_r3_6HG0621800
HORVU_MOREX_r3_4HG0352910
HORVU_MOREX_r3_3HG0318580
HORVU_MOREX_r3_2HG0213660
HORVU_MOREX_r3_4HG0412760
HORVU_MOREX_r3_2HG0168120
HORVU_MOREX_r3_5HG0463450
HORVU_MOREX_r3_3HG0285290
HORVU_MOREX_r3_7HG0687920
HORVU_MOREX_r3_2HG0216600
HORVU_MOREX_r3_2HG0183940
HORVU_MOREX_r3_3HG0269810
HORVU_MOREX_r3_6HG0603410
HORVU_MOREX_r3_5HG0482430
HORVU_MOREX_r3_7HG0714580
HORVU_MOREX_r3_7HG0671530
HORVU_MOREX_r3_4HG0409010
HORVU_MOREX_r3_1HG0040610
HORVU_MOREX_r3_2HG0129410
HORVU_MOREX_r3_7HG0648330
HORVU_MOREX_r3_4HG0343750
HORVU_MOREX_r3_7HG0684940
HORVU_MOREX_r3_7HG0668560
novel.3924
HORVU_MOREX_r3_2HG0173080
HORVU_MOREX_r3_3HG0237200
HORVU_MOREX_r3_3HG0247870
HORVU_MOREX_r3_1HG0027000
HORVU_MOREX_r3_2HG0183550
HORVU_MOREX_r3_7HG0648840
HORVU_MOREX_r3_3HG0266800
HORVU_MOREX_r3_4HG0333780
HORVU_MOREX_r3_4HG0412150
HORVU_MOREX_r3_1HG0082120
HORVU_MOREX_r3_2HG0201520
HORVU_MOREX_r3_5HG0470290
HORVU_MOREX_r3_7HG0674790
HORVU_MOREX_r3_1HG0056630
HORVU_MOREX_r3_1HG0087070
HORVU_MOREX_r3_2HG0189360
novel.720
HORVU_MOREX_r3_7HG0691910
HORVU_MOREX_r3_2HG0172120
novel.940
HORVU_MOREX_r3_7HG0647190
novel.5553
HORVU_MOREX_r3_2HG0153260
HORVU_MOREX_r3_7HG0675850
HORVU_MOREX_r3_4HG0394630
novel.4872
HORVU_MOREX_r3_5HG0477800
HORVU_MOREX_r3_5HG0527380
HORVU_MOREX_r3_2HG0192300
HORVU_MOREX_r3_1HG0023420
HORVU_MOREX_r3_4HG0344790
HORVU_MOREX_r3_6HG0595200
HORVU_MOREX_r3_3HG0294880
HORVU_MOREX_r3_1HG0062140
novel.3693
novel.412
novel.5414
HORVU_MOREX_r3_5HG0497150
HORVU_MOREX_r3_4HG0342430
HORVU_MOREX_r3_4HG0356850
HORVU_MOREX_r3_2HG0135120
HORVU_MOREX_r3_5HG0462580
HORVU_MOREX_r3_5HG0533730
HORVU_MOREX_r3_2HG0185240
HORVU_MOREX_r3_2HG0149510
novel.2966
HORVU_MOREX_r3_3HG0301040
novel.1335
HORVU_MOREX_r3_4HG0342130
HORVU_MOREX_r3_2HG0114930
HORVU_MOREX_r3_4HG0345760
novel.796
HORVU_MOREX_r3_2HG0125630
HORVU_MOREX_r3_1HG0084340
HORVU_MOREX_r3_2HG0195500
HORVU_MOREX_r3_5HG0497560
HORVU_MOREX_r3_2HG0186500
novel.3681
HORVU_MOREX_r3_3HG0275440
HORVU_MOREX_r3_3HG0287430
HORVU_MOREX_r3_3HG0297000
HORVU_MOREX_r3_5HG0512410
novel.6932
novel.130
HORVU_MOREX_r3_4HG0412640
HORVU_MOREX_r3_7HG0640140
HORVU_MOREX_r3_3HG0299650
HORVU_MOREX_r3_5HG0438910
novel.5851
HORVU_MOREX_r3_1HG0024740
HORVU_MOREX_r3_5HG0420500
HORVU_MOREX_r3_3HG0250200
HORVU_MOREX_r3_4HG0357360
novel.5072
HORVU_MOREX_r3_2HG0213240
HORVU_MOREX_r3_5HG0493200
HORVU_MOREX_r3_3HG0297730
HORVU_MOREX_r3_3HG0255230
HORVU_MOREX_r3_3HG0287790
HORVU_MOREX_r3_3HG0231540
HORVU_MOREX_r3_7HG0712460
HORVU_MOREX_r3_1HG0020980
HORVU_MOREX_r3_7HG0707160
novel.3365
HORVU_MOREX_r3_1HG0072890
HORVU_MOREX_r3_2HG0181800
HORVU_MOREX_r3_6HG0612680
HORVU_MOREX_r3_1HG0059290
HORVU_MOREX_r3_2HG0189330
HORVU_MOREX_r3_4HG0331420
HORVU_MOREX_r3_3HG0277200
novel.4080
HORVU_MOREX_r3_1HG0089130
HORVU_MOREX_r3_5HG0462850
novel.1304
HORVU_MOREX_r3_7HG0724140
HORVU_MOREX_r3_1HG0087230
HORVU_MOREX_r3_5HG0427250
HORVU_MOREX_r3_6HG0614350
HORVU_MOREX_r3_2HG0187470
HORVU_MOREX_r3_3HG0286500
HORVU_MOREX_r3_4HG0332220
HORVU_MOREX_r3_1HG0077030
HORVU_MOREX_r3_1HG0074040
HORVU_MOREX_r3_5HG0446410
HORVU_MOREX_r3_7HG0730320
novel.7524
novel.6320
HORVU_MOREX_r3_4HG0333510
HORVU_MOREX_r3_4HG0348190
HORVU_MOREX_r3_7HG0679410
HORVU_MOREX_r3_6HG0566190
HORVU_MOREX_r3_7HG0664770
HORVU_MOREX_r3_2HG0216570
HORVU_MOREX_r3_7HG0635380
HORVU_MOREX_r3_1HG0007910
HORVU_MOREX_r3_7HG0742500
HORVU_MOREX_r3_2HG0165450
HORVU_MOREX_r3_1HG0014410
HORVU_MOREX_r3_6HG0614040
novel.5747
HORVU_MOREX_r3_1HG0072680
HORVU_MOREX_r3_1HG0085920
HORVU_MOREX_r3_7HG0681690
novel.4132
HORVU_MOREX_r3_6HG0622510
HORVU_MOREX_r3_2HG0191210
novel.5612
HORVU_MOREX_r3_4HG0399520
HORVU_MOREX_r3_4HG0352930
novel.1166
HORVU_MOREX_r3_3HG0295580
HORVU_MOREX_r3_7HG0679960
HORVU_MOREX_r3_3HG0248960
HORVU_MOREX_r3_3HG0228860
HORVU_MOREX_r3_2HG0154530
HORVU_MOREX_r3_2HG0122510
HORVU_MOREX_r3_6HG0560910
HORVU_MOREX_r3_7HG0729220
HORVU_MOREX_r3_4HG0352600
HORVU_MOREX_r3_4HG0398480
HORVU_MOREX_r3_3HG0327170
novel.6704
HORVU_MOREX_r3_6HG0634060
HORVU_MOREX_r3_2HG0128340
HORVU_MOREX_r3_7HG0660080
novel.1635
HORVU_MOREX_r3_6HG0633810
HORVU_MOREX_r3_3HG0284170
HORVU_MOREX_r3_4HG0408080
HORVU_MOREX_r3_7HG0688310
HORVU_MOREX_r3_5HG0441580
HORVU_MOREX_r3_5HG0468930
HORVU_MOREX_r3_2HG0158950
novel.4668
HORVU_MOREX_r3_6HG0590590
HORVU_MOREX_r3_3HG0242150
HORVU_MOREX_r3_2HG0154660
HORVU_MOREX_r3_3HG0225270
HORVU_MOREX_r3_1HG0061820
HORVU_MOREX_r3_2HG0135760
HORVU_MOREX_r3_1HG0067630
novel.5961
HORVU_MOREX_r3_7HG0653380
HORVU_MOREX_r3_4HG0399760
HORVU_MOREX_r3_4HG0334320
HORVU_MOREX_r3_7HG0742240
HORVU_MOREX_r3_3HG0300410
HORVU_MOREX_r3_1HG0075360
novel.7271
HORVU_MOREX_r3_5HG0526170
novel.6839
HORVU_MOREX_r3_2HG0158000
HORVU_MOREX_r3_1HG0062460
novel.1061
HORVU_MOREX_r3_3HG0249060
HORVU_MOREX_r3_7HG0722070
HORVU_MOREX_r3_6HG0627980
HORVU_MOREX_r3_2HG0196510
HORVU_MOREX_r3_1HG0023940
HORVU_MOREX_r3_6HG0582550
HORVU_MOREX_r3_2HG0123830
novel.4839
HORVU_MOREX_r3_3HG0329260
novel.711
HORVU_MOREX_r3_1HG0071400
HORVU_MOREX_r3_6HG0574650
HORVU_MOREX_r3_6HG0576260
HORVU_MOREX_r3_1HG0070590
HORVU_MOREX_r3_2HG0181610
HORVU_MOREX_r3_7HG0716430
HORVU_MOREX_r3_1HG0055430
HORVU_MOREX_r3_3HG0281620
HORVU_MOREX_r3_5HG0501480
novel.2133
novel.944
novel.6848
HORVU_MOREX_r3_5HG0508640
HORVU_MOREX_r3_3HG0227700
HORVU_MOREX_r3_5HG0423190
novel.685
HORVU_MOREX_r3_2HG0100390
HORVU_MOREX_r3_4HG0413030
HORVU_MOREX_r3_6HG0603230
HORVU_MOREX_r3_7HG0656470
HORVU_MOREX_r3_2HG0142250
HORVU_MOREX_r3_1HG0077610
HORVU_MOREX_r3_4HG0349450
HORVU_MOREX_r3_5HG0475790
HORVU_MOREX_r3_4HG0343830
HORVU_MOREX_r3_1HG0057820
HORVU_MOREX_r3_4HG0395710
HORVU_MOREX_r3_5HG0443730
HORVU_MOREX_r3_4HG0343760
HORVU_MOREX_r3_7HG0670790
HORVU_MOREX_r3_4HG0397460
HORVU_MOREX_r3_3HG0285940
novel.5483
HORVU_MOREX_r3_6HG0580960
HORVU_MOREX_r3_3HG0309890
HORVU_MOREX_r3_6HG0594570
HORVU_MOREX_r3_6HG0613490
novel.4291
HORVU_MOREX_r3_7HG0717880
HORVU_MOREX_r3_6HG0616570
novel.6580
novel.3107
HORVU_MOREX_r3_5HG0471210
HORVU_MOREX_r3_3HG0301990
HORVU_MOREX_r3_2HG0193820
HORVU_MOREX_r3_6HG0618180
HORVU_MOREX_r3_6HG0568910
HORVU_MOREX_r3_1HG0095460
HORVU_MOREX_r3_5HG0510130
HORVU_MOREX_r3_2HG0112660

## Sheet: ZY1252-PEG_vs_ZY1252-CK_Down
HORVU_MOREX_r3_1HG0073940
HORVU_MOREX_r3_3HG0301110
HORVU_MOREX_r3_3HG0310810
HORVU_MOREX_r3_3HG0281730
HORVU_MOREX_r3_2HG0170120
HORVU_MOREX_r3_5HG0429400
HORVU_MOREX_r3_5HG0430240
HORVU_MOREX_r3_1HG0051310
HORVU_MOREX_r3_5HG0464780
HORVU_MOREX_r3_3HG0227830
HORVU_MOREX_r3_4HG0413770
HORVU_MOREX_r3_2HG0184930
HORVU_MOREX_r3_6HG0622920
HORVU_MOREX_r3_4HG0412910
HORVU_MOREX_r3_3HG0227780
HORVU_MOREX_r3_4HG0357330
HORVU_MOREX_r3_1HG0039840
HORVU_MOREX_r3_3HG0299440
HORVU_MOREX_r3_7HG0700030
HORVU_MOREX_r3_2HG0187120
HORVU_MOREX_r3_5HG0429380
novel.1476
HORVU_MOREX_r3_3HG0295610
HORVU_MOREX_r3_2HG0212050
HORVU_MOREX_r3_4HG0391170
HORVU_MOREX_r3_5HG0440150
HORVU_MOREX_r3_4HG0382910
HORVU_MOREX_r3_2HG0209180
HORVU_MOREX_r3_5HG0530780
HORVU_MOREX_r3_7HG0702830
HORVU_MOREX_r3_7HG0676790
HORVU_MOREX_r3_5HG0504280
HORVU_MOREX_r3_4HG0344120
HORVU_MOREX_r3_6HG0615560
HORVU_MOREX_r3_5HG0492720
HORVU_MOREX_r3_7HG0687560
HORVU_MOREX_r3_2HG0193070
HORVU_MOREX_r3_5HG0430200
HORVU_MOREX_r3_1HG0076550
HORVU_MOREX_r3_1HG0066460
HORVU_MOREX_r3_7HG0728340
novel.6551
HORVU_MOREX_r3_3HG0283480
HORVU_MOREX_r3_1HG0064030
HORVU_MOREX_r3_5HG0504310
HORVU_MOREX_r3_4HG0383820
HORVU_MOREX_r3_5HG0469700
HORVU_MOREX_r3_1HG0069740
HORVU_MOREX_r3_2HG0117590
HORVU_MOREX_r3_1HG0027640
HORVU_MOREX_r3_5HG0524540
HORVU_MOREX_r3_6HG0605890
HORVU_MOREX_r3_5HG0438620
HORVU_MOREX_r3_4HG0336570
HORVU_MOREX_r3_3HG0329570
HORVU_MOREX_r3_5HG0536910
HORVU_MOREX_r3_2HG0175220
HORVU_MOREX_r3_5HG0497680
HORVU_MOREX_r3_2HG0101720
HORVU_MOREX_r3_5HG0519420
HORVU_MOREX_r3_2HG0180680
HORVU_MOREX_r3_2HG0197270
HORVU_MOREX_r3_2HG0185490
HORVU_MOREX_r3_2HG0126410
HORVU_MOREX_r3_4HG0413520
HORVU_MOREX_r3_2HG0101810
HORVU_MOREX_r3_UnG0753350
HORVU_MOREX_r3_5HG0429520
HORVU_MOREX_r3_5HG0510650
HORVU_MOREX_r3_3HG0302230
HORVU_MOREX_r3_3HG0308180
HORVU_MOREX_r3_6HG0603700
novel.6359
novel.1795
HORVU_MOREX_r3_2HG0183420
HORVU_MOREX_r3_5HG0436950
HORVU_MOREX_r3_3HG0308630
HORVU_MOREX_r3_1HG0074350
HORVU_MOREX_r3_2HG0176250
HORVU_MOREX_r3_5HG0504290
HORVU_MOREX_r3_5HG0509060
HORVU_MOREX_r3_1HG0074000
HORVU_MOREX_r3_2HG0135060
HORVU_MOREX_r3_5HG0528540
HORVU_MOREX_r3_4HG0391570
HORVU_MOREX_r3_5HG0510590
HORVU_MOREX_r3_6HG0592420
HORVU_MOREX_r3_3HG0284720
HORVU_MOREX_r3_1HG0091980
HORVU_MOREX_r3_4HG0413910
HORVU_MOREX_r3_7HG0636540
HORVU_MOREX_r3_2HG0109530
HORVU_MOREX_r3_2HG0112720
HORVU_MOREX_r3_1HG0065220
HORVU_MOREX_r3_3HG0299950
HORVU_MOREX_r3_5HG0433240
HORVU_MOREX_r3_1HG0055890
HORVU_MOREX_r3_4HG0342480
HORVU_MOREX_r3_3HG0289300
HORVU_MOREX_r3_2HG0135900
HORVU_MOREX_r3_5HG0445960
HORVU_MOREX_r3_3HG0311560
HORVU_MOREX_r3_7HG0746680
HORVU_MOREX_r3_3HG0329310
HORVU_MOREX_r3_7HG0639370
HORVU_MOREX_r3_2HG0190560
HORVU_MOREX_r3_3HG0287660
HORVU_MOREX_r3_2HG0111290
HORVU_MOREX_r3_1HG0080730
HORVU_MOREX_r3_2HG0128970
HORVU_MOREX_r3_7HG0742800
HORVU_MOREX_r3_7HG0655610
HORVU_MOREX_r3_3HG0287760
HORVU_MOREX_r3_7HG0742700
HORVU_MOREX_r3_5HG0425080
HORVU_MOREX_r3_2HG0135310
HORVU_MOREX_r3_5HG0498130
HORVU_MOREX_r3_2HG0203580
HORVU_MOREX_r3_5HG0484180
HORVU_MOREX_r3_5HG0522880
HORVU_MOREX_r3_4HG0400860
HORVU_MOREX_r3_5HG0476180
HORVU_MOREX_r3_4HG0412340
HORVU_MOREX_r3_3HG0270100
HORVU_MOREX_r3_3HG0231810
HORVU_MOREX_r3_2HG0201580
HORVU_MOREX_r3_5HG0511680
HORVU_MOREX_r3_5HG0517640
HORVU_MOREX_r3_7HG0660400
HORVU_MOREX_r3_2HG0140970
HORVU_MOREX_r3_2HG0098470
HORVU_MOREX_r3_6HG0630890
HORVU_MOREX_r3_2HG0200310
HORVU_MOREX_r3_4HG0385030
HORVU_MOREX_r3_5HG0484620
novel.5863
HORVU_MOREX_r3_2HG0185880
HORVU_MOREX_r3_7HG0744120
HORVU_MOREX_r3_7HG0738190
HORVU_MOREX_r3_2HG0215250
HORVU_MOREX_r3_5HG0480040
novel.2468
HORVU_MOREX_r3_4HG0379080
HORVU_MOREX_r3_7HG0730010
HORVU_MOREX_r3_3HG0289810
HORVU_MOREX_r3_2HG0164160
HORVU_MOREX_r3_5HG0512190
HORVU_MOREX_r3_2HG0100290
HORVU_MOREX_r3_2HG0115000
HORVU_MOREX_r3_5HG0479240
HORVU_MOREX_r3_4HG0408940
HORVU_MOREX_r3_5HG0499610
HORVU_MOREX_r3_4HG0392580
HORVU_MOREX_r3_6HG0561180
HORVU_MOREX_r3_7HG0733490
HORVU_MOREX_r3_1HG0053060
HORVU_MOREX_r3_5HG0522510
HORVU_MOREX_r3_2HG0200390
HORVU_MOREX_r3_7HG0671810
HORVU_MOREX_r3_6HG0540130
HORVU_MOREX_r3_3HG0291400
HORVU_MOREX_r3_2HG0204690
HORVU_MOREX_r3_2HG0104810
HORVU_MOREX_r3_3HG0285070
HORVU_MOREX_r3_6HG0553820
HORVU_MOREX_r3_3HG0222320
HORVU_MOREX_r3_7HG0709950
HORVU_MOREX_r3_5HG0485910
HORVU_MOREX_r3_6HG0612510
HORVU_MOREX_r3_5HG0502220
HORVU_MOREX_r3_4HG0395540
HORVU_MOREX_r3_1HG0076260
HORVU_MOREX_r3_4HG0334790
novel.2613
HORVU_MOREX_r3_2HG0183930
HORVU_MOREX_r3_5HG0531900
HORVU_MOREX_r3_4HG0390400
novel.2529
HORVU_MOREX_r3_3HG0305530
novel.5330
HORVU_MOREX_r3_1HG0072750
HORVU_MOREX_r3_6HG0542640
HORVU_MOREX_r3_2HG0099170
HORVU_MOREX_r3_3HG0238370
HORVU_MOREX_r3_2HG0120030
HORVU_MOREX_r3_2HG0122170
HORVU_MOREX_r3_5HG0501310
HORVU_MOREX_r3_3HG0304770
HORVU_MOREX_r3_1HG0024440
HORVU_MOREX_r3_6HG0618750
HORVU_MOREX_r3_7HG0725710
HORVU_MOREX_r3_6HG0569280
HORVU_MOREX_r3_6HG0617010
novel.4080
HORVU_MOREX_r3_2HG0103880
HORVU_MOREX_r3_1HG0027490
HORVU_MOREX_r3_5HG0529760
HORVU_MOREX_r3_3HG0257380
HORVU_MOREX_r3_6HG0566290
HORVU_MOREX_r3_7HG0729110
HORVU_MOREX_r3_1HG0072450
HORVU_MOREX_r3_7HG0729950
HORVU_MOREX_r3_2HG0104780
HORVU_MOREX_r3_3HG0323330
HORVU_MOREX_r3_2HG0195450
HORVU_MOREX_r3_2HG0122880
HORVU_MOREX_r3_6HG0573340
HORVU_MOREX_r3_3HG0274900
HORVU_MOREX_r3_6HG0610960
HORVU_MOREX_r3_6HG0628320
HORVU_MOREX_r3_3HG0303700
HORVU_MOREX_r3_6HG0608820
HORVU_MOREX_r3_3HG0296630
HORVU_MOREX_r3_7HG0709700
HORVU_MOREX_r3_2HG0178520
HORVU_MOREX_r3_3HG0308190
HORVU_MOREX_r3_3HG0290780
HORVU_MOREX_r3_3HG0306690
HORVU_MOREX_r3_3HG0297880
HORVU_MOREX_r3_5HG0502780
novel.4181
HORVU_MOREX_r3_4HG0342080
HORVU_MOREX_r3_5HG0508410
HORVU_MOREX_r3_6HG0550800
HORVU_MOREX_r3_5HG0530900
novel.6493
HORVU_MOREX_r3_5HG0478850
HORVU_MOREX_r3_2HG0117530
HORVU_MOREX_r3_5HG0512510
HORVU_MOREX_r3_3HG0235770
HORVU_MOREX_r3_3HG0322830
HORVU_MOREX_r3_7HG0728810
HORVU_MOREX_r3_3HG0227850
HORVU_MOREX_r3_2HG0104740
HORVU_MOREX_r3_2HG0191260
HORVU_MOREX_r3_7HG0730950
novel.1046
HORVU_MOREX_r3_1HG0055500
HORVU_MOREX_r3_5HG0489780
HORVU_MOREX_r3_6HG0614470
novel.2194
HORVU_MOREX_r3_6HG0630880
HORVU_MOREX_r3_7HG0723260
HORVU_MOREX_r3_2HG0190040
HORVU_MOREX_r3_3HG0328960
HORVU_MOREX_r3_5HG0513730
novel.355
novel.6817
HORVU_MOREX_r3_4HG0402930
HORVU_MOREX_r3_2HG0165920
HORVU_MOREX_r3_5HG0520390
HORVU_MOREX_r3_7HG0667840
HORVU_MOREX_r3_5HG0443150
HORVU_MOREX_r3_3HG0299990
HORVU_MOREX_r3_2HG0154130
HORVU_MOREX_r3_2HG0180110
HORVU_MOREX_r3_1HG0039160
HORVU_MOREX_r3_6HG0605940
novel.2533
HORVU_MOREX_r3_4HG0393120
HORVU_MOREX_r3_6HG0595580
HORVU_MOREX_r3_1HG0032160
HORVU_MOREX_r3_1HG0046150
HORVU_MOREX_r3_2HG0181900
HORVU_MOREX_r3_4HG0390740
HORVU_MOREX_r3_5HG0429510
HORVU_MOREX_r3_2HG0187050
HORVU_MOREX_r3_6HG0599200
novel.1765
novel.1168
HORVU_MOREX_r3_6HG0572440
HORVU_MOREX_r3_6HG0628880
HORVU_MOREX_r3_3HG0291490
HORVU_MOREX_r3_7HG0687460
HORVU_MOREX_r3_5HG0474330
HORVU_MOREX_r3_7HG0668190
HORVU_MOREX_r3_1HG0023970
HORVU_MOREX_r3_3HG0233710
HORVU_MOREX_r3_6HG0566190
novel.1508
HORVU_MOREX_r3_6HG0617070
HORVU_MOREX_r3_2HG0193130
HORVU_MOREX_r3_2HG0163380
HORVU_MOREX_r3_1HG0004730
novel.4319
HORVU_MOREX_r3_1HG0077120
HORVU_MOREX_r3_2HG0191410
HORVU_MOREX_r3_5HG0530290
HORVU_MOREX_r3_1HG0094770
HORVU_MOREX_r3_5HG0523310
HORVU_MOREX_r3_3HG0287650
HORVU_MOREX_r3_3HG0302680
HORVU_MOREX_r3_2HG0104700
HORVU_MOREX_r3_3HG0289020
HORVU_MOREX_r3_5HG0445850
HORVU_MOREX_r3_5HG0527250
HORVU_MOREX_r3_3HG0301850
HORVU_MOREX_r3_2HG0152530
HORVU_MOREX_r3_2HG0137660
HORVU_MOREX_r3_7HG0728980
HORVU_MOREX_r3_4HG0397370
HORVU_MOREX_r3_2HG0187130
HORVU_MOREX_r3_7HG0739110
HORVU_MOREX_r3_6HG0597790
HORVU_MOREX_r3_4HG0342510
HORVU_MOREX_r3_1HG0028230
HORVU_MOREX_r3_1HG0023010
novel.5907
HORVU_MOREX_r3_1HG0021130
novel.6340
HORVU_MOREX_r3_1HG0082760
HORVU_MOREX_r3_7HG0678240
HORVU_MOREX_r3_2HG0121520
HORVU_MOREX_r3_2HG0215220
HORVU_MOREX_r3_7HG0667940
HORVU_MOREX_r3_3HG0293580
HORVU_MOREX_r3_3HG0228230
HORVU_MOREX_r3_3HG0237090
HORVU_MOREX_r3_1HG0057570
HORVU_MOREX_r3_2HG0111710
HORVU_MOREX_r3_2HG0126450
HORVU_MOREX_r3_1HG0021980
HORVU_MOREX_r3_3HG0271660
HORVU_MOREX_r3_7HG0674560
HORVU_MOREX_r3_6HG0625080
HORVU_MOREX_r3_6HG0593200
HORVU_MOREX_r3_5HG0490960
HORVU_MOREX_r3_3HG0283820
HORVU_MOREX_r3_6HG0606810
HORVU_MOREX_r3_6HG0614500
HORVU_MOREX_r3_6HG0617750
HORVU_MOREX_r3_2HG0104820
HORVU_MOREX_r3_1HG0074760
HORVU_MOREX_r3_6HG0589780
HORVU_MOREX_r3_5HG0520940
HORVU_MOREX_r3_7HG0658820
HORVU_MOREX_r3_3HG0324180
HORVU_MOREX_r3_1HG0020310
novel.5853
novel.7073
HORVU_MOREX_r3_2HG0104730
HORVU_MOREX_r3_5HG0486220
HORVU_MOREX_r3_6HG0613040
novel.6760
HORVU_MOREX_r3_2HG0123910
HORVU_MOREX_r3_7HG0686880
HORVU_MOREX_r3_6HG0572380
HORVU_MOREX_r3_3HG0244120
HORVU_MOREX_r3_3HG0314210
HORVU_MOREX_r3_6HG0560930
novel.4439
HORVU_MOREX_r3_6HG0549540
HORVU_MOREX_r3_4HG0388400
HORVU_MOREX_r3_2HG0124450
HORVU_MOREX_r3_2HG0195290
HORVU_MOREX_r3_5HG0491360
HORVU_MOREX_r3_3HG0318840
novel.435
HORVU_MOREX_r3_6HG0543900
HORVU_MOREX_r3_2HG0128300
HORVU_MOREX_r3_7HG0659490
novel.1174
HORVU_MOREX_r3_2HG0104760
HORVU_MOREX_r3_6HG0547700
novel.3050
HORVU_MOREX_r3_3HG0306260
HORVU_MOREX_r3_5HG0508720
HORVU_MOREX_r3_4HG0410810
HORVU_MOREX_r3_2HG0106350
HORVU_MOREX_r3_3HG0301800
HORVU_MOREX_r3_1HG0081340
HORVU_MOREX_r3_2HG0101420
HORVU_MOREX_r3_3HG0237920
HORVU_MOREX_r3_4HG0386780
novel.6226
HORVU_MOREX_r3_1HG0027590
HORVU_MOREX_r3_3HG0312760
HORVU_MOREX_r3_3HG0323940
novel.2253
HORVU_MOREX_r3_1HG0069720
novel.5640
HORVU_MOREX_r3_3HG0306300
novel.3253
HORVU_MOREX_r3_7HG0656670
novel.1385
HORVU_MOREX_r3_3HG0267820
HORVU_MOREX_r3_4HG0400980
HORVU_MOREX_r3_7HG0663880
HORVU_MOREX_r3_7HG0676420
HORVU_MOREX_r3_1HG0083520
HORVU_MOREX_r3_5HG0458650
HORVU_MOREX_r3_1HG0071710
HORVU_MOREX_r3_4HG0356290
novel.4743
HORVU_MOREX_r3_2HG0209020
novel.2898
HORVU_MOREX_r3_1HG0038750
HORVU_MOREX_r3_3HG0300600
HORVU_MOREX_r3_1HG0069410
HORVU_MOREX_r3_7HG0728750
HORVU_MOREX_r3_5HG0502770
HORVU_MOREX_r3_5HG0492940
HORVU_MOREX_r3_1HG0029910
HORVU_MOREX_r3_7HG0702090
HORVU_MOREX_r3_2HG0132820
HORVU_MOREX_r3_7HG0704060
HORVU_MOREX_r3_1HG0054020
HORVU_MOREX_r3_4HG0409450
HORVU_MOREX_r3_2HG0120190
HORVU_MOREX_r3_2HG0109800
novel.5371
novel.7242
HORVU_MOREX_r3_4HG0394050
HORVU_MOREX_r3_2HG0138320
HORVU_MOREX_r3_7HG0670360
HORVU_MOREX_r3_7HG0665990
novel.6875
HORVU_MOREX_r3_4HG0391910
novel.579
HORVU_MOREX_r3_6HG0616130
HORVU_MOREX_r3_7HG0726510
HORVU_MOREX_r3_1HG0014350
novel.65
HORVU_MOREX_r3_4HG0391730
HORVU_MOREX_r3_3HG0241530
novel.1067
HORVU_MOREX_r3_1HG0018590
HORVU_MOREX_r3_1HG0093420
HORVU_MOREX_r3_1HG0055630
HORVU_MOREX_r3_1HG0017670
HORVU_MOREX_r3_7HG0660260
novel.7155
HORVU_MOREX_r3_2HG0204260
novel.2524
HORVU_MOREX_r3_2HG0214310
novel.2794
HORVU_MOREX_r3_6HG0629220
HORVU_MOREX_r3_4HG0397520
HORVU_MOREX_r3_2HG0112290
HORVU_MOREX_r3_2HG0124540
HORVU_MOREX_r3_2HG0195030
HORVU_MOREX_r3_5HG0464130
HORVU_MOREX_r3_6HG0617930
HORVU_MOREX_r3_5HG0497340
novel.7126
novel.976
HORVU_MOREX_r3_3HG0292220
HORVU_MOREX_r3_1HG0039920
novel.3651
HORVU_MOREX_r3_6HG0609530
HORVU_MOREX_r3_5HG0485540
HORVU_MOREX_r3_5HG0482710
HORVU_MOREX_r3_1HG0065060
HORVU_MOREX_r3_5HG0464580
novel.1459
HORVU_MOREX_r3_4HG0380480
HORVU_MOREX_r3_7HG0720810
HORVU_MOREX_r3_5HG0536790
HORVU_MOREX_r3_3HG0305440
HORVU_MOREX_r3_3HG0291440
HORVU_MOREX_r3_4HG0332240
HORVU_MOREX_r3_5HG0516270
HORVU_MOREX_r3_7HG0651010
HORVU_MOREX_r3_3HG0307250
HORVU_MOREX_r3_7HG0740440
HORVU_MOREX_r3_6HG0613220
HORVU_MOREX_r3_5HG0444520
HORVU_MOREX_r3_1HG0021150
HORVU_MOREX_r3_7HG0637000
HORVU_MOREX_r3_7HG0738880
HORVU_MOREX_r3_1HG0091990
HORVU_MOREX_r3_3HG0307120
HORVU_MOREX_r3_7HG0720980
HORVU_MOREX_r3_6HG0556730
novel.4999
HORVU_MOREX_r3_1HG0016790
HORVU_MOREX_r3_6HG0625660
HORVU_MOREX_r3_6HG0568570
HORVU_MOREX_r3_6HG0540160
novel.4031
HORVU_MOREX_r3_1HG0075730
HORVU_MOREX_r3_4HG0354660
HORVU_MOREX_r3_2HG0180710
novel.1953
HORVU_MOREX_r3_3HG0229730
novel.6174
HORVU_MOREX_r3_4HG0384980
HORVU_MOREX_r3_3HG0307300
HORVU_MOREX_r3_5HG0486650
HORVU_MOREX_r3_5HG0474940
HORVU_MOREX_r3_3HG0289000
HORVU_MOREX_r3_7HG0708110
novel.3955
HORVU_MOREX_r3_2HG0096580
novel.29
HORVU_MOREX_r3_3HG0331060
HORVU_MOREX_r3_6HG0611930
novel.6892
novel.577
HORVU_MOREX_r3_5HG0491230
HORVU_MOREX_r3_4HG0413800
HORVU_MOREX_r3_2HG0201510
HORVU_MOREX_r3_2HG0192050
HORVU_MOREX_r3_4HG0358980
HORVU_MOREX_r3_5HG0485780
novel.4735
HORVU_MOREX_r3_2HG0129780
HORVU_MOREX_r3_2HG0215280
HORVU_MOREX_r3_5HG0482230
HORVU_MOREX_r3_4HG0397690
HORVU_MOREX_r3_6HG0619630
novel.177
HORVU_MOREX_r3_4HG0347760
HORVU_MOREX_r3_1HG0006400
novel.4200
HORVU_MOREX_r3_4HG0388810
HORVU_MOREX_r3_3HG0305780
HORVU_MOREX_r3_3HG0284170
HORVU_MOREX_r3_7HG0746520
HORVU_MOREX_r3_2HG0113980
HORVU_MOREX_r3_3HG0239530
HORVU_MOREX_r3_5HG0445910
novel.4758
HORVU_MOREX_r3_5HG0484930
HORVU_MOREX_r3_7HG0663080
HORVU_MOREX_r3_2HG0121480
HORVU_MOREX_r3_5HG0437580
HORVU_MOREX_r3_3HG0222390
HORVU_MOREX_r3_2HG0111190
HORVU_MOREX_r3_7HG0748900
HORVU_MOREX_r3_3HG0246180
HORVU_MOREX_r3_4HG0405730
HORVU_MOREX_r3_5HG0481630
HORVU_MOREX_r3_2HG0124770
novel.2335
HORVU_MOREX_r3_2HG0213040
novel.4127
HORVU_MOREX_r3_2HG0204250
HORVU_MOREX_r3_3HG0313090
HORVU_MOREX_r3_2HG0209640
HORVU_MOREX_r3_6HG0576010
HORVU_MOREX_r3_3HG0276340
HORVU_MOREX_r3_2HG0129990
HORVU_MOREX_r3_7HG0749870
HORVU_MOREX_r3_1HG0010450
HORVU_MOREX_r3_6HG0596460
HORVU_MOREX_r3_7HG0637240
HORVU_MOREX_r3_4HG0394870
HORVU_MOREX_r3_5HG0513850
novel.4620
HORVU_MOREX_r3_2HG0123550
HORVU_MOREX_r3_1HG0073950
HORVU_MOREX_r3_7HG0668680
HORVU_MOREX_r3_5HG0480600
novel.6762
HORVU_MOREX_r3_1HG0046230
HORVU_MOREX_r3_7HG0733480
HORVU_MOREX_r3_4HG0340040
HORVU_MOREX_r3_4HG0406630
HORVU_MOREX_r3_2HG0214850
HORVU_MOREX_r3_7HG0671540
HORVU_MOREX_r3_2HG0172750
HORVU_MOREX_r3_6HG0603090
HORVU_MOREX_r3_6HG0539500
HORVU_MOREX_r3_2HG0112440
HORVU_MOREX_r3_4HG0394080
novel.6749
HORVU_MOREX_r3_7HG0739520
HORVU_MOREX_r3_2HG0206600
HORVU_MOREX_r3_5HG0493330
HORVU_MOREX_r3_7HG0666550
HORVU_MOREX_r3_6HG0561620
HORVU_MOREX_r3_7HG0713820
HORVU_MOREX_r3_6HG0545090
HORVU_MOREX_r3_3HG0305390
HORVU_MOREX_r3_4HG0343130
novel.4158
novel.1117
HORVU_MOREX_r3_6HG0565930
novel.1441
HORVU_MOREX_r3_1HG0016850
HORVU_MOREX_r3_2HG0154230
HORVU_MOREX_r3_3HG0246070
novel.2314
HORVU_MOREX_r3_3HG0240350
HORVU_MOREX_r3_2HG0177600
HORVU_MOREX_r3_5HG0429360
HORVU_MOREX_r3_2HG0192000
HORVU_MOREX_r3_5HG0426000
HORVU_MOREX_r3_7HG0711310
HORVU_MOREX_r3_7HG0728760
novel.193
HORVU_MOREX_r3_5HG0510840
HORVU_MOREX_r3_6HG0599310
HORVU_MOREX_r3_3HG0283770
novel.3655
HORVU_MOREX_r3_4HG0413320
HORVU_MOREX_r3_4HG0412370
HORVU_MOREX_r3_7HG0685230
HORVU_MOREX_r3_1HG0080800
HORVU_MOREX_r3_3HG0219790
HORVU_MOREX_r3_5HG0462580
novel.2244
HORVU_MOREX_r3_3HG0219140
HORVU_MOREX_r3_4HG0380990
novel.4021
HORVU_MOREX_r3_4HG0333380
HORVU_MOREX_r3_7HG0721610
HORVU_MOREX_r3_4HG0384050
HORVU_MOREX_r3_2HG0112430
HORVU_MOREX_r3_3HG0312140
HORVU_MOREX_r3_2HG0103170
HORVU_MOREX_r3_4HG0402390
HORVU_MOREX_r3_3HG0289130
HORVU_MOREX_r3_2HG0115850
HORVU_MOREX_r3_2HG0107710
HORVU_MOREX_r3_3HG0290880
HORVU_MOREX_r3_2HG0178600
HORVU_MOREX_r3_7HG0644300
HORVU_MOREX_r3_3HG0316580
HORVU_MOREX_r3_5HG0433250
HORVU_MOREX_r3_1HG0031940
novel.2662
HORVU_MOREX_r3_5HG0522560
HORVU_MOREX_r3_4HG0335160
HORVU_MOREX_r3_3HG0244320
HORVU_MOREX_r3_7HG0722360
HORVU_MOREX_r3_6HG0575030
novel.4443
HORVU_MOREX_r3_1HG0089690
HORVU_MOREX_r3_1HG0026860
HORVU_MOREX_r3_3HG0248870
HORVU_MOREX_r3_5HG0529170
HORVU_MOREX_r3_3HG0281390
HORVU_MOREX_r3_2HG0136610
HORVU_MOREX_r3_2HG0169040

[truncated: 3 more sheets: ZY1252-PEG_vs_ZY1252-CK_Up, ZY97-PEG_vs_ZY97-CK_Down, ZY97-PEG_vs_ZY97-CK_Up]
