# Supplementary material for: Deciphering drought response mechanism in Tibetan qingke through comprehensive transcriptomic and physiological analysis
Source: Front Plant Sci. 2025 Jul 25;16:1633561. doi: 10.3389/fpls.2025.1633561 (PMC12331675; doi:10.3389/fpls.2025.1633561)
Supplement: Supplementary file 4 [file Table3.xlsx]

## Sheet: Supplementary Table S3
Supplementary Table S3. The intersection list of DEGs in the drought-sensitive cultivars group and the drought-tolerant cultivars group, respectively.

## Sheet: yc_unique_gene_ids
HORVU_MOREX_r3_3HG0302180
HORVU_MOREX_r3_3HG0284740
novel.1277
HORVU_MOREX_r3_1HG0050330
HORVU_MOREX_r3_3HG0291440
HORVU_MOREX_r3_6HG0619650
HORVU_MOREX_r3_4HG0335790
HORVU_MOREX_r3_7HG0752900
HORVU_MOREX_r3_1HG0073550
HORVU_MOREX_r3_4HG0338460
HORVU_MOREX_r3_5HG0465890
HORVU_MOREX_r3_7HG0720280
HORVU_MOREX_r3_6HG0627380
HORVU_MOREX_r3_6HG0570900
HORVU_MOREX_r3_3HG0301990
HORVU_MOREX_r3_4HG0336570
HORVU_MOREX_r3_5HG0463760
HORVU_MOREX_r3_3HG0270610
HORVU_MOREX_r3_7HG0708730
HORVU_MOREX_r3_2HG0099170
HORVU_MOREX_r3_6HG0569900
HORVU_MOREX_r3_5HG0509820
HORVU_MOREX_r3_4HG0387610
HORVU_MOREX_r3_2HG0199370
HORVU_MOREX_r3_4HG0412730
HORVU_MOREX_r3_4HG0348190
novel.7414
HORVU_MOREX_r3_7HG0712100
HORVU_MOREX_r3_1HG0064030
HORVU_MOREX_r3_1HG0080860

## Sheet: zy_unique_gene_ids
HORVU_MOREX_r3_5HG0508150
HORVU_MOREX_r3_4HG0340040
HORVU_MOREX_r3_6HG0542640
HORVU_MOREX_r3_6HG0617750
HORVU_MOREX_r3_6HG0566190
HORVU_MOREX_r3_7HG0714970
HORVU_MOREX_r3_6HG0624530
HORVU_MOREX_r3_5HG0462580
HORVU_MOREX_r3_6HG0547700
HORVU_MOREX_r3_5HG0476180
HORVU_MOREX_r3_4HG0341400
HORVU_MOREX_r3_5HG0473680
HORVU_MOREX_r3_3HG0276740
HORVU_MOREX_r3_6HG0611930
HORVU_MOREX_r3_6HG0605940
HORVU_MOREX_r3_7HG0685230
novel.6172
novel.2597
HORVU_MOREX_r3_7HG0677570
HORVU_MOREX_r3_5HG0497680
novel.1127
HORVU_MOREX_r3_7HG0708040
HORVU_MOREX_r3_2HG0184930
HORVU_MOREX_r3_4HG0383820
novel.4200
HORVU_MOREX_r3_6HG0561620
HORVU_MOREX_r3_2HG0187880
HORVU_MOREX_r3_7HG0723260
novel.7357
HORVU_MOREX_r3_4HG0334970
