# Supplementary material for: Deciphering drought response mechanism in Tibetan qingke through comprehensive transcriptomic and physiological analysis
Source: Front Plant Sci. 2025 Jul 25;16:1633561. doi: 10.3389/fpls.2025.1633561 (PMC12331675; doi:10.3389/fpls.2025.1633561)
Supplement: Supplementary file 5 [file Table4.xlsx]

## Sheet: Supplementary Table S4
Supplementary Table S4. The counts of DEGs enriched in each pathway shown in Figures 3C and 3D.

## Sheet: gene_count_YC83
geneID	go_count
HORVU_MOREX_r3_1HG0008440	2
HORVU_MOREX_r3_1HG0017770	1
HORVU_MOREX_r3_1HG0020820	1
HORVU_MOREX_r3_1HG0023640	1
HORVU_MOREX_r3_1HG0025530	1
HORVU_MOREX_r3_1HG0026830	1
HORVU_MOREX_r3_1HG0031380	1
HORVU_MOREX_r3_1HG0042420	1
HORVU_MOREX_r3_1HG0049040	1
HORVU_MOREX_r3_1HG0056780	1
HORVU_MOREX_r3_1HG0057040	1
HORVU_MOREX_r3_1HG0057590	1
HORVU_MOREX_r3_1HG0058280	1
HORVU_MOREX_r3_1HG0061300	1
HORVU_MOREX_r3_1HG0062940	1
HORVU_MOREX_r3_1HG0068010	1
HORVU_MOREX_r3_1HG0069260	1
HORVU_MOREX_r3_1HG0073420	1
HORVU_MOREX_r3_1HG0073500	1
HORVU_MOREX_r3_1HG0073840	1
HORVU_MOREX_r3_1HG0074730	1
HORVU_MOREX_r3_1HG0075430	2
HORVU_MOREX_r3_1HG0077000	1
HORVU_MOREX_r3_1HG0077030	2
HORVU_MOREX_r3_1HG0077840	1
HORVU_MOREX_r3_1HG0079870	1
HORVU_MOREX_r3_1HG0079930	1
HORVU_MOREX_r3_1HG0080750	1
HORVU_MOREX_r3_1HG0081150	1
HORVU_MOREX_r3_1HG0087810	2
HORVU_MOREX_r3_1HG0089070	1
HORVU_MOREX_r3_1HG0092200	1
HORVU_MOREX_r3_2HG0097540	2
HORVU_MOREX_r3_2HG0102500	1
HORVU_MOREX_r3_2HG0103920	1
HORVU_MOREX_r3_2HG0104680	1
HORVU_MOREX_r3_2HG0107970	1
HORVU_MOREX_r3_2HG0109700	1
HORVU_MOREX_r3_2HG0110530	1
HORVU_MOREX_r3_2HG0112150	1
HORVU_MOREX_r3_2HG0112580	2
HORVU_MOREX_r3_2HG0112640	2
HORVU_MOREX_r3_2HG0116360	1
HORVU_MOREX_r3_2HG0116580	1
HORVU_MOREX_r3_2HG0119120	1
HORVU_MOREX_r3_2HG0121520	1
HORVU_MOREX_r3_2HG0123480	1
HORVU_MOREX_r3_2HG0126000	1
HORVU_MOREX_r3_2HG0127530	2
HORVU_MOREX_r3_2HG0130270	1
HORVU_MOREX_r3_2HG0133020	1
HORVU_MOREX_r3_2HG0133180	1
HORVU_MOREX_r3_2HG0133370	1
HORVU_MOREX_r3_2HG0135760	1
HORVU_MOREX_r3_2HG0140050	1
HORVU_MOREX_r3_2HG0141200	1
HORVU_MOREX_r3_2HG0149510	1
HORVU_MOREX_r3_2HG0152170	1
HORVU_MOREX_r3_2HG0156150	1
HORVU_MOREX_r3_2HG0168060	1
HORVU_MOREX_r3_2HG0168480	1
HORVU_MOREX_r3_2HG0168900	1
HORVU_MOREX_r3_2HG0178640	1
HORVU_MOREX_r3_2HG0178720	1
HORVU_MOREX_r3_2HG0183770	1
HORVU_MOREX_r3_2HG0183850	2
HORVU_MOREX_r3_2HG0185850	1
HORVU_MOREX_r3_2HG0191580	1
HORVU_MOREX_r3_2HG0196540	1
HORVU_MOREX_r3_2HG0197540	2
HORVU_MOREX_r3_2HG0198070	1
HORVU_MOREX_r3_2HG0206500	1
HORVU_MOREX_r3_2HG0208270	1
HORVU_MOREX_r3_2HG0213250	1
HORVU_MOREX_r3_2HG0214130	1
HORVU_MOREX_r3_2HG0215760	1
HORVU_MOREX_r3_3HG0221900	1
HORVU_MOREX_r3_3HG0226120	1
HORVU_MOREX_r3_3HG0227360	1
HORVU_MOREX_r3_3HG0227370	1
HORVU_MOREX_r3_3HG0231330	1
HORVU_MOREX_r3_3HG0234240	1
HORVU_MOREX_r3_3HG0235910	1
HORVU_MOREX_r3_3HG0240890	1
HORVU_MOREX_r3_3HG0248260	1
HORVU_MOREX_r3_3HG0252270	1
HORVU_MOREX_r3_3HG0254990	2
HORVU_MOREX_r3_3HG0257140	1
HORVU_MOREX_r3_3HG0258530	1
HORVU_MOREX_r3_3HG0267230	1
HORVU_MOREX_r3_3HG0273280	1
HORVU_MOREX_r3_3HG0277200	1
HORVU_MOREX_r3_3HG0278710	2
HORVU_MOREX_r3_3HG0283630	1
HORVU_MOREX_r3_3HG0284330	1
HORVU_MOREX_r3_3HG0284890	1
HORVU_MOREX_r3_3HG0287680	1
HORVU_MOREX_r3_3HG0288960	1
HORVU_MOREX_r3_3HG0291030	2
HORVU_MOREX_r3_3HG0291040	1
HORVU_MOREX_r3_3HG0291100	1
HORVU_MOREX_r3_3HG0297330	1
HORVU_MOREX_r3_3HG0298340	1
HORVU_MOREX_r3_3HG0299990	1
HORVU_MOREX_r3_3HG0300120	1
HORVU_MOREX_r3_3HG0300970	1
HORVU_MOREX_r3_3HG0302100	1
HORVU_MOREX_r3_3HG0302520	1
HORVU_MOREX_r3_3HG0302700	1
HORVU_MOREX_r3_3HG0302810	2
HORVU_MOREX_r3_3HG0303700	1
HORVU_MOREX_r3_3HG0305770	1
HORVU_MOREX_r3_3HG0306270	1
HORVU_MOREX_r3_3HG0312320	1
HORVU_MOREX_r3_3HG0315590	1
HORVU_MOREX_r3_3HG0319810	1
HORVU_MOREX_r3_3HG0320750	1
HORVU_MOREX_r3_3HG0321700	1
HORVU_MOREX_r3_3HG0322130	1
HORVU_MOREX_r3_3HG0330120	1
HORVU_MOREX_r3_4HG0333780	1
HORVU_MOREX_r3_4HG0335340	2
HORVU_MOREX_r3_4HG0338290	1
HORVU_MOREX_r3_4HG0338720	1
HORVU_MOREX_r3_4HG0339340	1
HORVU_MOREX_r3_4HG0343330	1
HORVU_MOREX_r3_4HG0346720	2
HORVU_MOREX_r3_4HG0348850	1
HORVU_MOREX_r3_4HG0354610	2
HORVU_MOREX_r3_4HG0357420	1
HORVU_MOREX_r3_4HG0359070	1
HORVU_MOREX_r3_4HG0378000	1
HORVU_MOREX_r3_4HG0381060	1
HORVU_MOREX_r3_4HG0383630	1
HORVU_MOREX_r3_4HG0385790	1
HORVU_MOREX_r3_4HG0386330	2
HORVU_MOREX_r3_4HG0387070	1
HORVU_MOREX_r3_4HG0387870	2
HORVU_MOREX_r3_4HG0389060	1
HORVU_MOREX_r3_4HG0389340	1
HORVU_MOREX_r3_4HG0391470	1
HORVU_MOREX_r3_4HG0394130	1
HORVU_MOREX_r3_4HG0395160	2
HORVU_MOREX_r3_4HG0395580	2
HORVU_MOREX_r3_4HG0402760	1
HORVU_MOREX_r3_4HG0404740	1
HORVU_MOREX_r3_4HG0409870	1
HORVU_MOREX_r3_4HG0410300	1
HORVU_MOREX_r3_4HG0410750	2
HORVU_MOREX_r3_4HG0413680	1
HORVU_MOREX_r3_4HG0413910	1
HORVU_MOREX_r3_4HG0416920	1
HORVU_MOREX_r3_4HG0418350	1
HORVU_MOREX_r3_5HG0420500	1
HORVU_MOREX_r3_5HG0428300	1
HORVU_MOREX_r3_5HG0444790	2
HORVU_MOREX_r3_5HG0446790	1
HORVU_MOREX_r3_5HG0446860	1
HORVU_MOREX_r3_5HG0469340	2
HORVU_MOREX_r3_5HG0469800	2
HORVU_MOREX_r3_5HG0470760	2
HORVU_MOREX_r3_5HG0471050	1
HORVU_MOREX_r3_5HG0471840	1
HORVU_MOREX_r3_5HG0471980	1
HORVU_MOREX_r3_5HG0474130	1
HORVU_MOREX_r3_5HG0478010	1
HORVU_MOREX_r3_5HG0478250	1
HORVU_MOREX_r3_5HG0480330	1
HORVU_MOREX_r3_5HG0480620	2
HORVU_MOREX_r3_5HG0483980	1
HORVU_MOREX_r3_5HG0485780	2
HORVU_MOREX_r3_5HG0485790	2
HORVU_MOREX_r3_5HG0487060	1
HORVU_MOREX_r3_5HG0490330	1
HORVU_MOREX_r3_5HG0493090	1
HORVU_MOREX_r3_5HG0493200	2
HORVU_MOREX_r3_5HG0496040	1
HORVU_MOREX_r3_5HG0500590	1
HORVU_MOREX_r3_5HG0504770	1
HORVU_MOREX_r3_5HG0505490	1
HORVU_MOREX_r3_5HG0505950	1
HORVU_MOREX_r3_5HG0509680	1
HORVU_MOREX_r3_5HG0516720	1
HORVU_MOREX_r3_5HG0522100	1
HORVU_MOREX_r3_5HG0525230	1
HORVU_MOREX_r3_5HG0527720	1
HORVU_MOREX_r3_5HG0529760	1
HORVU_MOREX_r3_5HG0533960	1
HORVU_MOREX_r3_6HG0540480	1
HORVU_MOREX_r3_6HG0540900	1
HORVU_MOREX_r3_6HG0543600	1
HORVU_MOREX_r3_6HG0549370	1
HORVU_MOREX_r3_6HG0549780	1
HORVU_MOREX_r3_6HG0555660	1
HORVU_MOREX_r3_6HG0555700	1
HORVU_MOREX_r3_6HG0556720	1
HORVU_MOREX_r3_6HG0557280	2
HORVU_MOREX_r3_6HG0564840	1
HORVU_MOREX_r3_6HG0565800	1
HORVU_MOREX_r3_6HG0567520	1
HORVU_MOREX_r3_6HG0574460	2
HORVU_MOREX_r3_6HG0575530	1
HORVU_MOREX_r3_6HG0576780	1
HORVU_MOREX_r3_6HG0591920	1
HORVU_MOREX_r3_6HG0593770	1
HORVU_MOREX_r3_6HG0596580	1
HORVU_MOREX_r3_6HG0600000	1
HORVU_MOREX_r3_6HG0604000	1
HORVU_MOREX_r3_6HG0605830	2
HORVU_MOREX_r3_6HG0614370	1
HORVU_MOREX_r3_6HG0614470	1
HORVU_MOREX_r3_6HG0614570	1
HORVU_MOREX_r3_6HG0615550	1
HORVU_MOREX_r3_6HG0615630	1
HORVU_MOREX_r3_6HG0617000	1
HORVU_MOREX_r3_6HG0618640	2
HORVU_MOREX_r3_6HG0618650	2
HORVU_MOREX_r3_6HG0619150	1
HORVU_MOREX_r3_6HG0619890	1
HORVU_MOREX_r3_6HG0620720	1
HORVU_MOREX_r3_6HG0620920	2
HORVU_MOREX_r3_6HG0622690	1
HORVU_MOREX_r3_6HG0625910	1
HORVU_MOREX_r3_6HG0626440	1
HORVU_MOREX_r3_6HG0629240	1
HORVU_MOREX_r3_6HG0630710	1
HORVU_MOREX_r3_6HG0630790	1
HORVU_MOREX_r3_6HG0633810	1
HORVU_MOREX_r3_7HG0634950	1
HORVU_MOREX_r3_7HG0637280	1
HORVU_MOREX_r3_7HG0637290	1
HORVU_MOREX_r3_7HG0639230	1
HORVU_MOREX_r3_7HG0639380	1
HORVU_MOREX_r3_7HG0640740	1
HORVU_MOREX_r3_7HG0640950	2
HORVU_MOREX_r3_7HG0644300	2
HORVU_MOREX_r3_7HG0646060	1
HORVU_MOREX_r3_7HG0648360	1
HORVU_MOREX_r3_7HG0655800	1
HORVU_MOREX_r3_7HG0657870	1
HORVU_MOREX_r3_7HG0661950	2
HORVU_MOREX_r3_7HG0665050	1
HORVU_MOREX_r3_7HG0666880	1
HORVU_MOREX_r3_7HG0666960	1
HORVU_MOREX_r3_7HG0667900	1
HORVU_MOREX_r3_7HG0674730	1
HORVU_MOREX_r3_7HG0678940	1
HORVU_MOREX_r3_7HG0679100	2
HORVU_MOREX_r3_7HG0679840	1
HORVU_MOREX_r3_7HG0686960	1
HORVU_MOREX_r3_7HG0687190	1
HORVU_MOREX_r3_7HG0690270	2
HORVU_MOREX_r3_7HG0702290	1
HORVU_MOREX_r3_7HG0708100	1
HORVU_MOREX_r3_7HG0709040	2
HORVU_MOREX_r3_7HG0711310	1
HORVU_MOREX_r3_7HG0714980	1
HORVU_MOREX_r3_7HG0716400	1
HORVU_MOREX_r3_7HG0723200	2
HORVU_MOREX_r3_7HG0723420	1
HORVU_MOREX_r3_7HG0726310	1
HORVU_MOREX_r3_7HG0726800	1
HORVU_MOREX_r3_7HG0729100	1
HORVU_MOREX_r3_7HG0733490	1
HORVU_MOREX_r3_7HG0737450	1
HORVU_MOREX_r3_7HG0740440	1
HORVU_MOREX_r3_7HG0749090	1
HORVU_MOREX_r3_7HG0749460	2
novel.1	1
novel.1415	1
novel.1634	1
novel.1645	1
novel.1795	1
novel.2130	1
novel.2406	2
novel.2568	1
novel.2608	1
novel.263	1
novel.2713	1
novel.2753	1
novel.3361	1
novel.3536	1
novel.3683	1
novel.3754	1
novel.3769	1
novel.4007	1
novel.4118	1
novel.4138	1
novel.4153	1
novel.4735	1
novel.4772	1
novel.498	1
novel.5205	1
novel.5265	1
novel.5591	1
novel.5845	1
novel.5918	1
novel.6201	1
novel.6397	1
novel.6734	1
novel.6770	1
novel.6898	1
novel.7025	1
novel.7043	1
novel.7310	1
novel.7414	1
novel.7475	1
novel.847	1
novel.963	1
novel.972	1
novel.974	1

## Sheet: gene_count_YC85
geneID	go_count
HORVU_MOREX_r3_1HG0049040	2
HORVU_MOREX_r3_1HG0050330	1
HORVU_MOREX_r3_1HG0058690	1
HORVU_MOREX_r3_1HG0069240	2
HORVU_MOREX_r3_1HG0071650	2
HORVU_MOREX_r3_1HG0073870	1
HORVU_MOREX_r3_1HG0080020	1
HORVU_MOREX_r3_1HG0080890	2
HORVU_MOREX_r3_1HG0090320	1
HORVU_MOREX_r3_1HG0090670	2
HORVU_MOREX_r3_2HG0095500	1
HORVU_MOREX_r3_2HG0103650	1
HORVU_MOREX_r3_2HG0153230	1
HORVU_MOREX_r3_2HG0155570	1
HORVU_MOREX_r3_2HG0181900	1
HORVU_MOREX_r3_2HG0185100	2
HORVU_MOREX_r3_2HG0196540	1
HORVU_MOREX_r3_2HG0196950	2
HORVU_MOREX_r3_2HG0198490	1
HORVU_MOREX_r3_2HG0199610	1
HORVU_MOREX_r3_3HG0227420	2
HORVU_MOREX_r3_3HG0233030	1
HORVU_MOREX_r3_3HG0233820	2
HORVU_MOREX_r3_3HG0267730	3
HORVU_MOREX_r3_3HG0276740	1
HORVU_MOREX_r3_3HG0284740	2
HORVU_MOREX_r3_3HG0286890	1
HORVU_MOREX_r3_3HG0288960	1
HORVU_MOREX_r3_3HG0302060	1
HORVU_MOREX_r3_3HG0302180	1
HORVU_MOREX_r3_3HG0305460	4
HORVU_MOREX_r3_3HG0330150	1
HORVU_MOREX_r3_4HG0348190	1
HORVU_MOREX_r3_4HG0349450	1
HORVU_MOREX_r3_4HG0358770	1
HORVU_MOREX_r3_4HG0389000	2
HORVU_MOREX_r3_4HG0397640	1
HORVU_MOREX_r3_5HG0433240	1
HORVU_MOREX_r3_5HG0437090	2
HORVU_MOREX_r3_5HG0442330	1
HORVU_MOREX_r3_5HG0463440	1
HORVU_MOREX_r3_5HG0473680	1
HORVU_MOREX_r3_5HG0474130	1
HORVU_MOREX_r3_5HG0479040	1
HORVU_MOREX_r3_5HG0480430	2
HORVU_MOREX_r3_5HG0504280	1
HORVU_MOREX_r3_5HG0507390	4
HORVU_MOREX_r3_5HG0516830	4
HORVU_MOREX_r3_5HG0517140	1
HORVU_MOREX_r3_6HG0574410	1
HORVU_MOREX_r3_6HG0577940	1
HORVU_MOREX_r3_6HG0592430	1
HORVU_MOREX_r3_6HG0602880	3
HORVU_MOREX_r3_6HG0603700	2
HORVU_MOREX_r3_6HG0619650	2
HORVU_MOREX_r3_6HG0622760	4
HORVU_MOREX_r3_6HG0622770	4
HORVU_MOREX_r3_6HG0622790	4
HORVU_MOREX_r3_7HG0637810	1
HORVU_MOREX_r3_7HG0642100	1
HORVU_MOREX_r3_7HG0664010	1
HORVU_MOREX_r3_7HG0685350	1
HORVU_MOREX_r3_7HG0718190	2
HORVU_MOREX_r3_7HG0719250	1
HORVU_MOREX_r3_7HG0730410	1
HORVU_MOREX_r3_7HG0743280	1
novel.6227	1

## Sheet: gene_count_YC88
geneID	go_count
HORVU_MOREX_r3_1HG0050330	2
HORVU_MOREX_r3_1HG0055890	1
HORVU_MOREX_r3_1HG0061140	1
HORVU_MOREX_r3_1HG0068490	1
HORVU_MOREX_r3_1HG0076260	1
HORVU_MOREX_r3_1HG0078500	1
HORVU_MOREX_r3_1HG0079120	1
HORVU_MOREX_r3_1HG0089900	1
HORVU_MOREX_r3_1HG0092550	1
HORVU_MOREX_r3_1HG0093520	1
HORVU_MOREX_r3_2HG0099570	1
HORVU_MOREX_r3_2HG0112630	1
HORVU_MOREX_r3_2HG0112640	1
HORVU_MOREX_r3_2HG0114150	1
HORVU_MOREX_r3_2HG0126880	2
HORVU_MOREX_r3_2HG0135060	3
HORVU_MOREX_r3_2HG0140970	1
HORVU_MOREX_r3_2HG0167350	1
HORVU_MOREX_r3_2HG0172790	2
HORVU_MOREX_r3_2HG0185100	1
HORVU_MOREX_r3_2HG0196120	3
HORVU_MOREX_r3_2HG0197540	1
HORVU_MOREX_r3_3HG0227420	1
HORVU_MOREX_r3_3HG0237580	1
HORVU_MOREX_r3_3HG0256190	2
HORVU_MOREX_r3_3HG0259700	1
HORVU_MOREX_r3_3HG0282170	1
HORVU_MOREX_r3_3HG0284740	1
HORVU_MOREX_r3_3HG0304260	1
HORVU_MOREX_r3_4HG0379300	1
HORVU_MOREX_r3_4HG0383820	1
HORVU_MOREX_r3_4HG0387870	1
HORVU_MOREX_r3_4HG0394460	1
HORVU_MOREX_r3_4HG0396100	1
HORVU_MOREX_r3_4HG0402170	1
HORVU_MOREX_r3_4HG0404420	1
HORVU_MOREX_r3_5HG0430240	2
HORVU_MOREX_r3_5HG0433250	1
HORVU_MOREX_r3_5HG0437090	2
HORVU_MOREX_r3_5HG0483980	2
HORVU_MOREX_r3_5HG0484320	2
HORVU_MOREX_r3_5HG0485170	1
HORVU_MOREX_r3_5HG0488660	1
HORVU_MOREX_r3_5HG0504280	1
HORVU_MOREX_r3_5HG0504310	1
HORVU_MOREX_r3_5HG0512930	1
HORVU_MOREX_r3_6HG0619650	2
HORVU_MOREX_r3_7HG0637810	1
HORVU_MOREX_r3_7HG0712940	1
HORVU_MOREX_r3_7HG0716520	1
HORVU_MOREX_r3_7HG0746230	2
novel.214	1
novel.6403	2
novel.7185	1
novel.7414	2
novel.991	2

## Sheet: gene_count_ZY97
geneID	go_count
HORVU_MOREX_r3_1HG0009050	1
HORVU_MOREX_r3_1HG0020440	2
HORVU_MOREX_r3_1HG0023680	1
HORVU_MOREX_r3_1HG0025320	1
HORVU_MOREX_r3_1HG0026830	1
HORVU_MOREX_r3_1HG0045940	1
HORVU_MOREX_r3_1HG0053590	1
HORVU_MOREX_r3_1HG0054870	1
HORVU_MOREX_r3_1HG0059000	1
HORVU_MOREX_r3_1HG0059810	1
HORVU_MOREX_r3_1HG0068010	1
HORVU_MOREX_r3_1HG0073350	1
HORVU_MOREX_r3_1HG0076770	1
HORVU_MOREX_r3_1HG0087810	2
HORVU_MOREX_r3_1HG0087910	1
HORVU_MOREX_r3_1HG0088480	1
HORVU_MOREX_r3_2HG0110810	1
HORVU_MOREX_r3_2HG0111820	1
HORVU_MOREX_r3_2HG0116360	1
HORVU_MOREX_r3_2HG0119120	1
HORVU_MOREX_r3_2HG0121520	1
HORVU_MOREX_r3_2HG0121630	1
HORVU_MOREX_r3_2HG0123480	1
HORVU_MOREX_r3_2HG0135760	1
HORVU_MOREX_r3_2HG0178640	1
HORVU_MOREX_r3_2HG0178700	1
HORVU_MOREX_r3_2HG0183770	1
HORVU_MOREX_r3_2HG0184080	1
HORVU_MOREX_r3_2HG0184130	1
HORVU_MOREX_r3_2HG0193180	1
HORVU_MOREX_r3_2HG0195210	1
HORVU_MOREX_r3_2HG0196050	1
HORVU_MOREX_r3_2HG0196540	2
HORVU_MOREX_r3_2HG0203070	2
HORVU_MOREX_r3_2HG0205970	1
HORVU_MOREX_r3_2HG0206500	1
HORVU_MOREX_r3_2HG0213820	1
HORVU_MOREX_r3_3HG0219050	2
HORVU_MOREX_r3_3HG0227780	1
HORVU_MOREX_r3_3HG0234240	1
HORVU_MOREX_r3_3HG0239170	1
HORVU_MOREX_r3_3HG0244960	1
HORVU_MOREX_r3_3HG0247520	1
HORVU_MOREX_r3_3HG0248870	1
HORVU_MOREX_r3_3HG0254940	1
HORVU_MOREX_r3_3HG0254990	1
HORVU_MOREX_r3_3HG0255020	1
HORVU_MOREX_r3_3HG0271660	1
HORVU_MOREX_r3_3HG0276810	1
HORVU_MOREX_r3_3HG0277910	2
HORVU_MOREX_r3_3HG0278550	1
HORVU_MOREX_r3_3HG0278710	2
HORVU_MOREX_r3_3HG0285210	1
HORVU_MOREX_r3_3HG0286070	1
HORVU_MOREX_r3_3HG0291040	1
HORVU_MOREX_r3_3HG0298340	1
HORVU_MOREX_r3_3HG0305770	1
HORVU_MOREX_r3_3HG0315350	1
HORVU_MOREX_r3_3HG0316870	1
HORVU_MOREX_r3_3HG0320670	1
HORVU_MOREX_r3_3HG0320740	1
HORVU_MOREX_r3_3HG0320750	1
HORVU_MOREX_r3_4HG0333780	1
HORVU_MOREX_r3_4HG0338060	1
HORVU_MOREX_r3_4HG0350600	2
HORVU_MOREX_r3_4HG0353940	2
HORVU_MOREX_r3_4HG0383820	1
HORVU_MOREX_r3_4HG0386330	2
HORVU_MOREX_r3_4HG0386490	1
HORVU_MOREX_r3_4HG0395580	2
HORVU_MOREX_r3_4HG0395910	1
HORVU_MOREX_r3_4HG0399940	1
HORVU_MOREX_r3_4HG0402760	1
HORVU_MOREX_r3_4HG0404740	1
HORVU_MOREX_r3_4HG0410300	1
HORVU_MOREX_r3_4HG0410750	2
HORVU_MOREX_r3_4HG0416570	1
HORVU_MOREX_r3_5HG0420500	1
HORVU_MOREX_r3_5HG0440870	1
HORVU_MOREX_r3_5HG0442330	1
HORVU_MOREX_r3_5HG0455100	1
HORVU_MOREX_r3_5HG0460570	1
HORVU_MOREX_r3_5HG0469340	2
HORVU_MOREX_r3_5HG0474120	1
HORVU_MOREX_r3_5HG0474130	1
HORVU_MOREX_r3_5HG0476550	1
HORVU_MOREX_r3_5HG0479040	2
HORVU_MOREX_r3_5HG0480050	1
HORVU_MOREX_r3_5HG0480130	2
HORVU_MOREX_r3_5HG0480150	2
HORVU_MOREX_r3_5HG0490330	1
HORVU_MOREX_r3_5HG0500590	2
HORVU_MOREX_r3_5HG0511330	2
HORVU_MOREX_r3_5HG0529760	1
HORVU_MOREX_r3_5HG0536260	1
HORVU_MOREX_r3_6HG0540480	1
HORVU_MOREX_r3_6HG0542970	2
HORVU_MOREX_r3_6HG0546590	1
HORVU_MOREX_r3_6HG0549520	1
HORVU_MOREX_r3_6HG0551380	1
HORVU_MOREX_r3_6HG0552470	1
HORVU_MOREX_r3_6HG0556730	1
HORVU_MOREX_r3_6HG0557280	2
HORVU_MOREX_r3_6HG0557700	2
HORVU_MOREX_r3_6HG0568390	2
HORVU_MOREX_r3_6HG0570440	2
HORVU_MOREX_r3_6HG0574360	2
HORVU_MOREX_r3_6HG0574410	2
HORVU_MOREX_r3_6HG0576010	2
HORVU_MOREX_r3_6HG0600000	1
HORVU_MOREX_r3_6HG0604730	1
HORVU_MOREX_r3_6HG0605960	1
HORVU_MOREX_r3_6HG0606290	1
HORVU_MOREX_r3_6HG0614370	1
HORVU_MOREX_r3_6HG0614470	1
HORVU_MOREX_r3_6HG0615710	1
HORVU_MOREX_r3_6HG0617370	1
HORVU_MOREX_r3_6HG0617380	1
HORVU_MOREX_r3_6HG0618650	1
HORVU_MOREX_r3_6HG0620200	2
HORVU_MOREX_r3_6HG0622690	1
HORVU_MOREX_r3_6HG0628410	1
HORVU_MOREX_r3_7HG0637280	1
HORVU_MOREX_r3_7HG0644190	2
HORVU_MOREX_r3_7HG0644300	1
HORVU_MOREX_r3_7HG0646060	3
HORVU_MOREX_r3_7HG0656030	2
HORVU_MOREX_r3_7HG0656350	1
HORVU_MOREX_r3_7HG0663400	1
HORVU_MOREX_r3_7HG0666880	1
HORVU_MOREX_r3_7HG0667900	1
HORVU_MOREX_r3_7HG0671590	1
HORVU_MOREX_r3_7HG0678940	1
HORVU_MOREX_r3_7HG0696450	1
HORVU_MOREX_r3_7HG0697320	3
HORVU_MOREX_r3_7HG0707160	1
HORVU_MOREX_r3_7HG0708100	1
HORVU_MOREX_r3_7HG0709040	2
HORVU_MOREX_r3_7HG0711070	1
HORVU_MOREX_r3_7HG0711310	1
HORVU_MOREX_r3_7HG0716400	1
HORVU_MOREX_r3_7HG0721830	1
HORVU_MOREX_r3_7HG0721840	1
HORVU_MOREX_r3_7HG0726700	1
HORVU_MOREX_r3_7HG0728480	1
HORVU_MOREX_r3_7HG0732230	1
HORVU_MOREX_r3_7HG0743900	2
HORVU_MOREX_r3_7HG0748160	1
HORVU_MOREX_r3_7HG0751500	2
novel.319	1
novel.3693	1
novel.4153	1
novel.7443	1

## Sheet: gene_count_ZY1100
geneID	go_count
HORVU_MOREX_r3_1HG0021710	1
HORVU_MOREX_r3_1HG0040000	1
HORVU_MOREX_r3_1HG0041630	2
HORVU_MOREX_r3_1HG0049040	4
HORVU_MOREX_r3_1HG0050330	2
HORVU_MOREX_r3_1HG0057350	1
HORVU_MOREX_r3_1HG0061820	1
HORVU_MOREX_r3_1HG0065130	1
HORVU_MOREX_r3_1HG0069100	1
HORVU_MOREX_r3_1HG0071710	2
HORVU_MOREX_r3_1HG0073870	2
HORVU_MOREX_r3_1HG0080890	3
HORVU_MOREX_r3_1HG0084340	2
HORVU_MOREX_r3_1HG0087910	1
HORVU_MOREX_r3_1HG0090670	2
HORVU_MOREX_r3_2HG0109700	4
HORVU_MOREX_r3_2HG0111820	1
HORVU_MOREX_r3_2HG0133450	2
HORVU_MOREX_r3_2HG0135120	2
HORVU_MOREX_r3_2HG0185100	3
HORVU_MOREX_r3_2HG0185380	1
HORVU_MOREX_r3_2HG0192300	1
HORVU_MOREX_r3_2HG0196950	1
HORVU_MOREX_r3_2HG0199560	2
HORVU_MOREX_r3_2HG0213240	1
HORVU_MOREX_r3_2HG0216570	1
HORVU_MOREX_r3_3HG0247870	1
HORVU_MOREX_r3_3HG0267730	4
HORVU_MOREX_r3_3HG0276740	1
HORVU_MOREX_r3_3HG0284740	3
HORVU_MOREX_r3_3HG0286890	2
HORVU_MOREX_r3_3HG0296180	2
HORVU_MOREX_r3_3HG0299890	1
HORVU_MOREX_r3_3HG0301720	2
HORVU_MOREX_r3_3HG0302060	2
HORVU_MOREX_r3_3HG0302180	1
HORVU_MOREX_r3_3HG0304260	2
HORVU_MOREX_r3_3HG0305460	2
HORVU_MOREX_r3_3HG0308190	3
HORVU_MOREX_r3_3HG0315260	3
HORVU_MOREX_r3_3HG0319810	1
HORVU_MOREX_r3_4HG0334970	1
HORVU_MOREX_r3_4HG0348190	1
HORVU_MOREX_r3_4HG0349450	1
HORVU_MOREX_r3_4HG0381750	1
HORVU_MOREX_r3_4HG0383820	2
HORVU_MOREX_r3_4HG0389000	3
HORVU_MOREX_r3_4HG0393390	1
HORVU_MOREX_r3_4HG0399940	1
HORVU_MOREX_r3_4HG0409510	2
HORVU_MOREX_r3_4HG0410510	1
HORVU_MOREX_r3_4HG0412150	1
HORVU_MOREX_r3_5HG0437090	3
HORVU_MOREX_r3_5HG0473680	1
HORVU_MOREX_r3_5HG0477620	1
HORVU_MOREX_r3_5HG0480050	1
HORVU_MOREX_r3_5HG0484020	1
HORVU_MOREX_r3_5HG0485790	2
HORVU_MOREX_r3_5HG0492170	2
HORVU_MOREX_r3_5HG0509760	1
HORVU_MOREX_r3_5HG0516830	2
HORVU_MOREX_r3_5HG0536610	1
HORVU_MOREX_r3_6HG0547990	1
HORVU_MOREX_r3_6HG0552580	1
HORVU_MOREX_r3_6HG0567100	1
HORVU_MOREX_r3_6HG0577940	2
HORVU_MOREX_r3_6HG0602880	2
HORVU_MOREX_r3_6HG0612680	1
HORVU_MOREX_r3_6HG0613690	2
HORVU_MOREX_r3_6HG0614350	2
HORVU_MOREX_r3_6HG0618650	2
HORVU_MOREX_r3_6HG0619650	4
HORVU_MOREX_r3_6HG0619890	3
HORVU_MOREX_r3_6HG0622760	2
HORVU_MOREX_r3_6HG0622770	2
HORVU_MOREX_r3_6HG0622790	2
HORVU_MOREX_r3_7HG0637810	2
HORVU_MOREX_r3_7HG0668560	1
HORVU_MOREX_r3_7HG0707160	1
HORVU_MOREX_r3_7HG0714970	2
HORVU_MOREX_r3_7HG0729020	1
HORVU_MOREX_r3_7HG0751030	2
novel.1060	2
novel.1482	1
novel.1634	1
novel.2133	1
novel.313	1
novel.3693	1

## Sheet: gene_count_ZY1252
geneID	go_count
HORVU_MOREX_r3_1HG0014620	2
HORVU_MOREX_r3_1HG0037800	3
HORVU_MOREX_r3_1HG0039860	1
HORVU_MOREX_r3_1HG0045870	1
HORVU_MOREX_r3_1HG0059360	1
HORVU_MOREX_r3_1HG0067270	3
HORVU_MOREX_r3_1HG0086250	1
HORVU_MOREX_r3_1HG0086720	3
HORVU_MOREX_r3_1HG0091980	1
HORVU_MOREX_r3_1HG0091990	1
HORVU_MOREX_r3_1HG0093090	1
HORVU_MOREX_r3_2HG0110720	1
HORVU_MOREX_r3_2HG0114930	4
HORVU_MOREX_r3_2HG0118530	2
HORVU_MOREX_r3_2HG0121300	3
HORVU_MOREX_r3_2HG0121900	2
HORVU_MOREX_r3_2HG0127540	2
HORVU_MOREX_r3_2HG0141000	1
HORVU_MOREX_r3_2HG0171590	1
HORVU_MOREX_r3_2HG0176250	1
HORVU_MOREX_r3_2HG0178560	1
HORVU_MOREX_r3_2HG0189960	3
HORVU_MOREX_r3_2HG0195080	1
HORVU_MOREX_r3_2HG0196710	2
HORVU_MOREX_r3_2HG0197290	3
HORVU_MOREX_r3_3HG0235200	1
HORVU_MOREX_r3_3HG0237720	1
HORVU_MOREX_r3_3HG0287790	1
HORVU_MOREX_r3_3HG0308180	1
HORVU_MOREX_r3_3HG0308190	1
HORVU_MOREX_r3_4HG0339290	2
HORVU_MOREX_r3_4HG0340710	1
HORVU_MOREX_r3_4HG0379010	3
HORVU_MOREX_r3_4HG0383540	2
HORVU_MOREX_r3_4HG0399920	2
HORVU_MOREX_r3_4HG0411240	3
HORVU_MOREX_r3_4HG0411740	1
HORVU_MOREX_r3_4HG0418790	1
HORVU_MOREX_r3_5HG0428990	4
HORVU_MOREX_r3_5HG0429940	1
HORVU_MOREX_r3_5HG0455760	1
HORVU_MOREX_r3_5HG0488110	1
HORVU_MOREX_r3_5HG0500660	1
HORVU_MOREX_r3_5HG0505300	2
HORVU_MOREX_r3_5HG0508550	1
HORVU_MOREX_r3_5HG0517610	1
HORVU_MOREX_r3_5HG0519230	2
HORVU_MOREX_r3_5HG0519510	1
HORVU_MOREX_r3_5HG0520790	1
HORVU_MOREX_r3_5HG0528860	1
HORVU_MOREX_r3_5HG0535890	1
HORVU_MOREX_r3_5HG0536100	2
HORVU_MOREX_r3_6HG0564480	1
HORVU_MOREX_r3_6HG0594100	3
HORVU_MOREX_r3_6HG0611730	4
HORVU_MOREX_r3_6HG0613550	1
HORVU_MOREX_r3_6HG0617940	1
HORVU_MOREX_r3_6HG0632080	1
HORVU_MOREX_r3_7HG0635400	1
HORVU_MOREX_r3_7HG0666500	2
HORVU_MOREX_r3_7HG0696930	1
HORVU_MOREX_r3_7HG0701300	1
HORVU_MOREX_r3_7HG0704060	1
HORVU_MOREX_r3_7HG0708580	1
HORVU_MOREX_r3_7HG0710080	2
HORVU_MOREX_r3_7HG0714970	1
HORVU_MOREX_r3_7HG0722670	2
HORVU_MOREX_r3_7HG0727070	1
HORVU_MOREX_r3_7HG0747280	2
novel.3003	1
novel.4239	1
novel.5318	1
