# Supplementary material for: Deciphering drought response mechanism in Tibetan qingke through comprehensive transcriptomic and physiological analysis
Source: Front Plant Sci. 2025 Jul 25;16:1633561. doi: 10.3389/fpls.2025.1633561 (PMC12331675; doi:10.3389/fpls.2025.1633561)
Supplement: Supplementary file 6 [file Table5.xlsx]

## Sheet: Supplementary Table S5
Supplementary Table S5. Gene lists of modules with high correlation to physiological parameters in WGCNA.

## Sheet: darkgrey_gene_list
HORVU_MOREX_r3_6HG0549510
novel.2843
novel.1543
HORVU_MOREX_r3_2HG0110000
HORVU_MOREX_r3_2HG0111450
HORVU_MOREX_r3_3HG0224740
novel.7534
HORVU_MOREX_r3_7HG0640180
HORVU_MOREX_r3_1HG0083970
HORVU_MOREX_r3_4HG0409710
HORVU_MOREX_r3_4HG0332930
HORVU_MOREX_r3_2HG0210680
HORVU_MOREX_r3_7HG0639080
novel.5586
HORVU_MOREX_r3_2HG0210950
HORVU_MOREX_r3_5HG0485700
HORVU_MOREX_r3_7HG0635740
HORVU_MOREX_r3_5HG0478690
novel.1128
HORVU_MOREX_r3_1HG0037010
HORVU_MOREX_r3_4HG0396020
HORVU_MOREX_r3_2HG0217820
HORVU_MOREX_r3_5HG0421430
novel.53
novel.4320
HORVU_MOREX_r3_5HG0432950
HORVU_MOREX_r3_2HG0096410
HORVU_MOREX_r3_6HG0578870
HORVU_MOREX_r3_3HG0306150
novel.819
HORVU_MOREX_r3_5HG0537610
HORVU_MOREX_r3_5HG0458920
HORVU_MOREX_r3_2HG0159940
HORVU_MOREX_r3_4HG0404420
HORVU_MOREX_r3_7HG0672210
novel.165
novel.5266
HORVU_MOREX_r3_7HG0747270
HORVU_MOREX_r3_6HG0595890
HORVU_MOREX_r3_7HG0717380
novel.2144
HORVU_MOREX_r3_2HG0096400
HORVU_MOREX_r3_5HG0518510
HORVU_MOREX_r3_3HG0249240
HORVU_MOREX_r3_2HG0166270
HORVU_MOREX_r3_3HG0295840
novel.6466
HORVU_MOREX_r3_5HG0486340
novel.7489
HORVU_MOREX_r3_7HG0691980
novel.1501
HORVU_MOREX_r3_5HG0518530
HORVU_MOREX_r3_1HG0042060
HORVU_MOREX_r3_6HG0558580
HORVU_MOREX_r3_5HG0503950
HORVU_MOREX_r3_7HG0675160
HORVU_MOREX_r3_3HG0298520
HORVU_MOREX_r3_3HG0230910
HORVU_MOREX_r3_7HG0646210
novel.2921
HORVU_MOREX_r3_7HG0747140
HORVU_MOREX_r3_5HG0503200
HORVU_MOREX_r3_2HG0135860
novel.322
HORVU_MOREX_r3_7HG0749840
HORVU_MOREX_r3_7HG0643820
HORVU_MOREX_r3_3HG0301540
HORVU_MOREX_r3_3HG0291580
novel.3700
HORVU_MOREX_r3_5HG0422720
HORVU_MOREX_r3_5HG0468410
HORVU_MOREX_r3_7HG0751140
novel.6372
HORVU_MOREX_r3_2HG0101260
HORVU_MOREX_r3_4HG0342430
HORVU_MOREX_r3_2HG0199680
HORVU_MOREX_r3_6HG0567530
HORVU_MOREX_r3_6HG0606490
HORVU_MOREX_r3_6HG0546930
HORVU_MOREX_r3_5HG0481420
HORVU_MOREX_r3_4HG0398540
HORVU_MOREX_r3_2HG0193750
HORVU_MOREX_r3_4HG0398360
HORVU_MOREX_r3_1HG0004890
HORVU_MOREX_r3_3HG0313870
HORVU_MOREX_r3_3HG0312510
HORVU_MOREX_r3_7HG0660660
HORVU_MOREX_r3_7HG0642120
HORVU_MOREX_r3_2HG0138060
novel.7258
novel.43
HORVU_MOREX_r3_1HG0068490
novel.2451
novel.2261
HORVU_MOREX_r3_2HG0173540
HORVU_MOREX_r3_3HG0294550
HORVU_MOREX_r3_6HG0630000
HORVU_MOREX_r3_3HG0228060
novel.2339
HORVU_MOREX_r3_7HG0729150
HORVU_MOREX_r3_2HG0096850
novel.7070
HORVU_MOREX_r3_1HG0086530
novel.2334
HORVU_MOREX_r3_6HG0633650
HORVU_MOREX_r3_7HG0656960
novel.6794
novel.6534
novel.2046
HORVU_MOREX_r3_6HG0627540
HORVU_MOREX_r3_2HG0116610
HORVU_MOREX_r3_2HG0199420
novel.7111
HORVU_MOREX_r3_1HG0005780
HORVU_MOREX_r3_5HG0487030
novel.5812
HORVU_MOREX_r3_4HG0388120
novel.4503
novel.3922
novel.6018
novel.4842
HORVU_MOREX_r3_3HG0229700
HORVU_MOREX_r3_6HG0541500
HORVU_MOREX_r3_2HG0096420
HORVU_MOREX_r3_7HG0666060
novel.1640
novel.279
HORVU_MOREX_r3_7HG0679410
HORVU_MOREX_r3_5HG0533220
novel.2020
novel.5196
novel.7296
novel.1582
novel.3260
HORVU_MOREX_r3_1HG0078400
HORVU_MOREX_r3_7HG0672960
novel.1635
HORVU_MOREX_r3_4HG0348690
novel.6882
novel.5395
novel.914
novel.4658
HORVU_MOREX_r3_1HG0068090
novel.6369
HORVU_MOREX_r3_3HG0243690
HORVU_MOREX_r3_5HG0488740
HORVU_MOREX_r3_3HG0315390
novel.1181
HORVU_MOREX_r3_5HG0529880
HORVU_MOREX_r3_6HG0546960
HORVU_MOREX_r3_3HG0229250
novel.3824
HORVU_MOREX_r3_7HG0687970
novel.5802
HORVU_MOREX_r3_1HG0086640
HORVU_MOREX_r3_2HG0173410
HORVU_MOREX_r3_4HG0401620
novel.2118
HORVU_MOREX_r3_7HG0675030
novel.4129
novel.2734
novel.2600
HORVU_MOREX_r3_5HG0433610
HORVU_MOREX_r3_1HG0092680
novel.5859
HORVU_MOREX_r3_1HG0003610
novel.2973
HORVU_MOREX_r3_3HG0219730
HORVU_MOREX_r3_7HG0663570
novel.3759
HORVU_MOREX_r3_6HG0546950
novel.2651
novel.2733
novel.6596
novel.2226
novel.646
HORVU_MOREX_r3_2HG0201640
novel.1643
HORVU_MOREX_r3_6HG0566680
HORVU_MOREX_r3_6HG0540910
novel.3461
novel.2303
HORVU_MOREX_r3_5HG0492800
HORVU_MOREX_r3_3HG0306890
novel.5703
novel.1749
HORVU_MOREX_r3_2HG0197230
HORVU_MOREX_r3_1HG0011680
novel.3463
novel.2621
HORVU_MOREX_r3_4HG0410680
HORVU_MOREX_r3_7HG0716390
HORVU_MOREX_r3_5HG0502880
HORVU_MOREX_r3_6HG0615870
novel.1022
novel.6020
novel.4852
novel.6252
novel.7069
HORVU_MOREX_r3_5HG0529820
HORVU_MOREX_r3_1HG0024650
novel.5368
HORVU_MOREX_r3_4HG0349060
HORVU_MOREX_r3_3HG0316550
novel.5541
novel.2623
HORVU_MOREX_r3_1HG0022550
novel.3678
novel.167
novel.2263
novel.728
novel.5650
HORVU_MOREX_r3_6HG0560680
HORVU_MOREX_r3_7HG0723710
novel.3323
novel.3827
novel.6440
HORVU_MOREX_r3_7HG0747960
novel.5464
novel.5185
novel.2258
HORVU_MOREX_r3_6HG0574120
novel.2210
novel.7002
novel.5510
novel.6647
novel.979
HORVU_MOREX_r3_5HG0485260
novel.3243
novel.6368
novel.1290
HORVU_MOREX_r3_6HG0631780
novel.5598
novel.6981
HORVU_MOREX_r3_1HG0094510
novel.6972
novel.804
novel.4106
novel.3864
HORVU_MOREX_r3_4HG0405310
novel.7343
HORVU_MOREX_r3_3HG0317710
novel.5442
novel.735
novel.1702
novel.3877
novel.1458
novel.5883
HORVU_MOREX_r3_5HG0500860
HORVU_MOREX_r3_2HG0119310
novel.460
HORVU_MOREX_r3_3HG0229690
HORVU_MOREX_r3_1HG0055740
novel.4527
HORVU_MOREX_r3_4HG0342830
novel.3462
HORVU_MOREX_r3_3HG0299940
HORVU_MOREX_r3_3HG0227270
novel.7273
novel.2257
novel.4617
novel.1059
novel.7398
novel.454
novel.4595
novel.5629
HORVU_MOREX_r3_1HG0094670
HORVU_MOREX_r3_1HG0014650
novel.4233
HORVU_MOREX_r3_5HG0504000
novel.2647
novel.4113
HORVU_MOREX_r3_5HG0537420
novel.7082
HORVU_MOREX_r3_5HG0498340
novel.6281
novel.7570
novel.2385
novel.1873
novel.4522
novel.4051
HORVU_MOREX_r3_3HG0286560
HORVU_MOREX_r3_2HG0098670
novel.621
novel.6391
novel.4000
novel.4700
novel.3493
novel.2704
HORVU_MOREX_r3_6HG0620610
novel.3105
HORVU_MOREX_r3_4HG0352030
novel.1572
HORVU_MOREX_r3_3HG0322060
novel.975
novel.6152
novel.2653
HORVU_MOREX_r3_1HG0081200
HORVU_MOREX_r3_1HG0051240
HORVU_MOREX_r3_3HG0316540
HORVU_MOREX_r3_2HG0098640
novel.459
HORVU_MOREX_r3_UnG0782330
novel.7076
HORVU_MOREX_r3_7HG0680490
HORVU_MOREX_r3_7HG0671220
HORVU_MOREX_r3_6HG0633660
HORVU_MOREX_r3_3HG0283350
HORVU_MOREX_r3_5HG0450220
HORVU_MOREX_r3_7HG0736980
HORVU_MOREX_r3_2HG0108640
HORVU_MOREX_r3_7HG0658790

## Sheet: coral2_gene_list
HORVU_MOREX_r3_1HG0044750
HORVU_MOREX_r3_7HG0681090
novel.3992
novel.6657
HORVU_MOREX_r3_3HG0318400
novel.3564
novel.5060
novel.5716
novel.5638
HORVU_MOREX_r3_7HG0722960
HORVU_MOREX_r3_2HG0117400
HORVU_MOREX_r3_6HG0627750
HORVU_MOREX_r3_1HG0084000
novel.3975
HORVU_MOREX_r3_3HG0243210
HORVU_MOREX_r3_3HG0227930
HORVU_MOREX_r3_6HG0631190
HORVU_MOREX_r3_3HG0327810
HORVU_MOREX_r3_7HG0736130
HORVU_MOREX_r3_3HG0282710
novel.7259
HORVU_MOREX_r3_1HG0085490
HORVU_MOREX_r3_4HG0416190
HORVU_MOREX_r3_7HG0669780
HORVU_MOREX_r3_7HG0648880
HORVU_MOREX_r3_5HG0481690
HORVU_MOREX_r3_7HG0717590
HORVU_MOREX_r3_6HG0608920
novel.6766
novel.3195
HORVU_MOREX_r3_6HG0608160
HORVU_MOREX_r3_6HG0583020
HORVU_MOREX_r3_3HG0219160
HORVU_MOREX_r3_5HG0485460
HORVU_MOREX_r3_1HG0093450
HORVU_MOREX_r3_3HG0257310
HORVU_MOREX_r3_6HG0616230
HORVU_MOREX_r3_1HG0063350
HORVU_MOREX_r3_1HG0027190
HORVU_MOREX_r3_4HG0410190
HORVU_MOREX_r3_6HG0576880
HORVU_MOREX_r3_4HG0418770
HORVU_MOREX_r3_6HG0612470
HORVU_MOREX_r3_1HG0065020
HORVU_MOREX_r3_4HG0401510
HORVU_MOREX_r3_1HG0075990
HORVU_MOREX_r3_6HG0568130
HORVU_MOREX_r3_6HG0584740
HORVU_MOREX_r3_4HG0411160
HORVU_MOREX_r3_2HG0167650
HORVU_MOREX_r3_6HG0626940
novel.5903
HORVU_MOREX_r3_4HG0394930
HORVU_MOREX_r3_4HG0396220
HORVU_MOREX_r3_1HG0031450
HORVU_MOREX_r3_6HG0606930
HORVU_MOREX_r3_7HG0658760
HORVU_MOREX_r3_1HG0055540
HORVU_MOREX_r3_3HG0327220
novel.690
HORVU_MOREX_r3_5HG0527440
HORVU_MOREX_r3_3HG0313930
HORVU_MOREX_r3_3HG0279320
HORVU_MOREX_r3_5HG0425680
novel.907
HORVU_MOREX_r3_3HG0304650
HORVU_MOREX_r3_4HG0391990
HORVU_MOREX_r3_4HG0337110
HORVU_MOREX_r3_5HG0505330
HORVU_MOREX_r3_6HG0561680
HORVU_MOREX_r3_6HG0609380
HORVU_MOREX_r3_6HG0591450
HORVU_MOREX_r3_5HG0444370
HORVU_MOREX_r3_6HG0547800
HORVU_MOREX_r3_2HG0193490
HORVU_MOREX_r3_4HG0352760
HORVU_MOREX_r3_2HG0151430
HORVU_MOREX_r3_4HG0372820
HORVU_MOREX_r3_7HG0720690
HORVU_MOREX_r3_1HG0084120
HORVU_MOREX_r3_5HG0421470
novel.1141
HORVU_MOREX_r3_4HG0346740
HORVU_MOREX_r3_2HG0188370
HORVU_MOREX_r3_5HG0480560
HORVU_MOREX_r3_5HG0441420
HORVU_MOREX_r3_4HG0401730
HORVU_MOREX_r3_3HG0330430
novel.561
HORVU_MOREX_r3_7HG0742450
HORVU_MOREX_r3_7HG0712650
HORVU_MOREX_r3_6HG0565560
HORVU_MOREX_r3_3HG0312430
HORVU_MOREX_r3_4HG0333290
HORVU_MOREX_r3_2HG0140190
HORVU_MOREX_r3_2HG0205450
novel.6644
HORVU_MOREX_r3_1HG0081230
HORVU_MOREX_r3_2HG0159460
novel.2779
novel.6006
novel.581

## Sheet: honeydew_gene_list
HORVU_MOREX_r3_3HG0300600
HORVU_MOREX_r3_7HG0691610
HORVU_MOREX_r3_7HG0656900
HORVU_MOREX_r3_1HG0090650
HORVU_MOREX_r3_3HG0318620
HORVU_MOREX_r3_1HG0077130
HORVU_MOREX_r3_3HG0267220
HORVU_MOREX_r3_3HG0266820
HORVU_MOREX_r3_1HG0089190
HORVU_MOREX_r3_1HG0054500
HORVU_MOREX_r3_2HG0147020
HORVU_MOREX_r3_7HG0680770
HORVU_MOREX_r3_6HG0585520
HORVU_MOREX_r3_1HG0024690
HORVU_MOREX_r3_4HG0337710
HORVU_MOREX_r3_1HG0014340
novel.4519
HORVU_MOREX_r3_6HG0599880
HORVU_MOREX_r3_5HG0497200
HORVU_MOREX_r3_6HG0607110
novel.4974
HORVU_MOREX_r3_4HG0408570
HORVU_MOREX_r3_5HG0420180
HORVU_MOREX_r3_7HG0676590
HORVU_MOREX_r3_1HG0072840
HORVU_MOREX_r3_2HG0165770
HORVU_MOREX_r3_4HG0396290
HORVU_MOREX_r3_3HG0262130
HORVU_MOREX_r3_2HG0188270
HORVU_MOREX_r3_5HG0486850
HORVU_MOREX_r3_3HG0263620
HORVU_MOREX_r3_4HG0411630
HORVU_MOREX_r3_6HG0615010
HORVU_MOREX_r3_2HG0157150
HORVU_MOREX_r3_6HG0584070
HORVU_MOREX_r3_7HG0748360
HORVU_MOREX_r3_7HG0673580
HORVU_MOREX_r3_4HG0344950
HORVU_MOREX_r3_2HG0099990
HORVU_MOREX_r3_7HG0658260
HORVU_MOREX_r3_7HG0723740
HORVU_MOREX_r3_3HG0294450
HORVU_MOREX_r3_5HG0475900
HORVU_MOREX_r3_5HG0429970
novel.7443
novel.94
HORVU_MOREX_r3_1HG0067200
HORVU_MOREX_r3_3HG0306420
novel.3000
HORVU_MOREX_r3_5HG0535120
HORVU_MOREX_r3_1HG0025840
HORVU_MOREX_r3_1HG0014490
HORVU_MOREX_r3_4HG0363600

## Sheet: salmon2_gene_list
HORVU_MOREX_r3_3HG0330590
HORVU_MOREX_r3_7HG0709720
HORVU_MOREX_r3_2HG0172320
HORVU_MOREX_r3_3HG0286330
HORVU_MOREX_r3_2HG0159420
HORVU_MOREX_r3_1HG0054010
HORVU_MOREX_r3_5HG0532220
HORVU_MOREX_r3_3HG0324600
HORVU_MOREX_r3_7HG0665280
novel.6795
HORVU_MOREX_r3_5HG0472040
HORVU_MOREX_r3_2HG0113190
HORVU_MOREX_r3_7HG0745610
HORVU_MOREX_r3_5HG0439620
HORVU_MOREX_r3_3HG0330980
HORVU_MOREX_r3_2HG0158850
HORVU_MOREX_r3_2HG0202250
novel.5863
HORVU_MOREX_r3_5HG0530970
HORVU_MOREX_r3_4HG0349520
HORVU_MOREX_r3_2HG0139260
HORVU_MOREX_r3_7HG0674320
HORVU_MOREX_r3_4HG0355680
HORVU_MOREX_r3_5HG0522500
HORVU_MOREX_r3_5HG0469030
HORVU_MOREX_r3_6HG0625320
HORVU_MOREX_r3_1HG0056360
HORVU_MOREX_r3_2HG0128750
HORVU_MOREX_r3_1HG0026430
HORVU_MOREX_r3_5HG0478860
novel.2482
HORVU_MOREX_r3_2HG0153470
HORVU_MOREX_r3_1HG0061300
HORVU_MOREX_r3_1HG0057490
HORVU_MOREX_r3_1HG0059820
HORVU_MOREX_r3_4HG0334590
HORVU_MOREX_r3_1HG0084970
HORVU_MOREX_r3_2HG0184270
HORVU_MOREX_r3_7HG0670990
HORVU_MOREX_r3_7HG0666260
HORVU_MOREX_r3_5HG0470980
HORVU_MOREX_r3_5HG0490430
HORVU_MOREX_r3_7HG0734380
HORVU_MOREX_r3_4HG0333170
HORVU_MOREX_r3_6HG0626450
HORVU_MOREX_r3_4HG0334090
HORVU_MOREX_r3_6HG0632890
HORVU_MOREX_r3_3HG0285290
HORVU_MOREX_r3_5HG0488050
novel.6758
novel.2153
novel.2356
HORVU_MOREX_r3_7HG0711960
novel.7410
HORVU_MOREX_r3_5HG0503610
novel.1044
HORVU_MOREX_r3_2HG0121940
novel.4273
HORVU_MOREX_r3_1HG0093750

## Sheet: red_gene_list
HORVU_MOREX_r3_4HG0407580
HORVU_MOREX_r3_4HG0382510
HORVU_MOREX_r3_2HG0167220
novel.5904
HORVU_MOREX_r3_5HG0507230
novel.5556
novel.2561
novel.4772
novel.1
HORVU_MOREX_r3_2HG0122100
HORVU_MOREX_r3_4HG0418700
novel.938
novel.5918
HORVU_MOREX_r3_7HG0639380
novel.2568
novel.5591
novel.6898
novel.2713
HORVU_MOREX_r3_2HG0133220
novel.3657
novel.4788
novel.3185
novel.7479
novel.4007
HORVU_MOREX_r3_7HG0711020
HORVU_MOREX_r3_6HG0551740
novel.4138
novel.6272
novel.3361
novel.1415
HORVU_MOREX_r3_4HG0379270
HORVU_MOREX_r3_1HG0000850
novel.5265
HORVU_MOREX_r3_5HG0471050
HORVU_MOREX_r3_1HG0057590
HORVU_MOREX_r3_6HG0609880
HORVU_MOREX_r3_4HG0412610
novel.6734
HORVU_MOREX_r3_5HG0509070
novel.6201
novel.1782
HORVU_MOREX_r3_2HG0106600
HORVU_MOREX_r3_1HG0057040
novel.800
novel.3536
HORVU_MOREX_r3_5HG0480620
novel.1306
novel.2608
HORVU_MOREX_r3_6HG0616540
HORVU_MOREX_r3_2HG0102500
novel.3765
novel.4755
novel.2417
HORVU_MOREX_r3_1HG0005580
HORVU_MOREX_r3_3HG0289290
HORVU_MOREX_r3_7HG0693420
HORVU_MOREX_r3_1HG0066180
novel.2104
novel.5845
HORVU_MOREX_r3_2HG0111600
HORVU_MOREX_r3_7HG0661950
HORVU_MOREX_r3_1HG0065530
novel.3769
novel.1360
HORVU_MOREX_r3_4HG0399690
HORVU_MOREX_r3_6HG0619150
HORVU_MOREX_r3_2HG0106230
HORVU_MOREX_r3_2HG0140050
HORVU_MOREX_r3_6HG0570470
novel.1011
HORVU_MOREX_r3_6HG0567520
HORVU_MOREX_r3_1HG0066010
HORVU_MOREX_r3_2HG0168950
HORVU_MOREX_r3_4HG0333240
HORVU_MOREX_r3_4HG0404720
HORVU_MOREX_r3_3HG0269850
HORVU_MOREX_r3_2HG0152170
HORVU_MOREX_r3_5HG0501080
HORVU_MOREX_r3_2HG0165860
HORVU_MOREX_r3_5HG0475360
HORVU_MOREX_r3_6HG0602640
HORVU_MOREX_r3_3HG0289030
HORVU_MOREX_r3_7HG0689440
HORVU_MOREX_r3_2HG0191580
novel.4118
HORVU_MOREX_r3_5HG0444790
HORVU_MOREX_r3_7HG0728120
HORVU_MOREX_r3_2HG0133180
HORVU_MOREX_r3_3HG0275530
HORVU_MOREX_r3_5HG0495890
HORVU_MOREX_r3_1HG0080160
HORVU_MOREX_r3_5HG0513200
HORVU_MOREX_r3_6HG0608130
HORVU_MOREX_r3_3HG0290920
HORVU_MOREX_r3_7HG0713520
HORVU_MOREX_r3_5HG0444900
HORVU_MOREX_r3_6HG0587280
HORVU_MOREX_r3_2HG0165190
HORVU_MOREX_r3_7HG0684040
HORVU_MOREX_r3_6HG0568780
HORVU_MOREX_r3_2HG0208270
HORVU_MOREX_r3_1HG0045040
HORVU_MOREX_r3_5HG0493200
HORVU_MOREX_r3_3HG0285310
HORVU_MOREX_r3_2HG0126000
HORVU_MOREX_r3_5HG0443720
novel.1091
HORVU_MOREX_r3_1HG0090310
HORVU_MOREX_r3_6HG0620920
HORVU_MOREX_r3_6HG0594290
HORVU_MOREX_r3_4HG0385040
novel.5810
HORVU_MOREX_r3_1HG0061750
HORVU_MOREX_r3_1HG0056010
HORVU_MOREX_r3_5HG0525230
HORVU_MOREX_r3_3HG0248260
HORVU_MOREX_r3_1HG0005590
HORVU_MOREX_r3_7HG0656250
novel.5086
HORVU_MOREX_r3_6HG0577180
novel.3995
novel.7240
HORVU_MOREX_r3_6HG0609600
HORVU_MOREX_r3_2HG0209690
HORVU_MOREX_r3_6HG0626850
HORVU_MOREX_r3_2HG0099810
HORVU_MOREX_r3_5HG0490680
HORVU_MOREX_r3_4HG0335000
HORVU_MOREX_r3_4HG0335500
HORVU_MOREX_r3_5HG0505770
HORVU_MOREX_r3_4HG0378000
HORVU_MOREX_r3_2HG0173960
HORVU_MOREX_r3_5HG0507540
HORVU_MOREX_r3_6HG0625860
HORVU_MOREX_r3_7HG0730350
HORVU_MOREX_r3_5HG0500680
HORVU_MOREX_r3_5HG0497900
HORVU_MOREX_r3_7HG0721250
HORVU_MOREX_r3_1HG0059400
HORVU_MOREX_r3_1HG0053580
HORVU_MOREX_r3_2HG0195550
HORVU_MOREX_r3_2HG0146530
novel.5347
HORVU_MOREX_r3_2HG0177820
HORVU_MOREX_r3_4HG0397620
HORVU_MOREX_r3_1HG0049620
novel.6397
HORVU_MOREX_r3_2HG0162580
HORVU_MOREX_r3_2HG0136460
HORVU_MOREX_r3_3HG0220140
HORVU_MOREX_r3_6HG0622500
HORVU_MOREX_r3_1HG0088680
HORVU_MOREX_r3_5HG0500210
HORVU_MOREX_r3_2HG0131350
HORVU_MOREX_r3_4HG0376960
HORVU_MOREX_r3_2HG0121700
HORVU_MOREX_r3_1HG0058780
HORVU_MOREX_r3_7HG0737490
HORVU_MOREX_r3_7HG0656430
HORVU_MOREX_r3_5HG0496380
novel.5792
novel.2519
HORVU_MOREX_r3_4HG0354610
HORVU_MOREX_r3_2HG0144560
HORVU_MOREX_r3_7HG0698250
novel.5012
HORVU_MOREX_r3_7HG0705350
novel.3419
HORVU_MOREX_r3_5HG0487290
novel.963
HORVU_MOREX_r3_5HG0497350
HORVU_MOREX_r3_2HG0130310
HORVU_MOREX_r3_6HG0607460
HORVU_MOREX_r3_2HG0133370
HORVU_MOREX_r3_2HG0141200
HORVU_MOREX_r3_2HG0161020
HORVU_MOREX_r3_7HG0689490
HORVU_MOREX_r3_1HG0053850
HORVU_MOREX_r3_5HG0515030
HORVU_MOREX_r3_7HG0643650
HORVU_MOREX_r3_2HG0168610
HORVU_MOREX_r3_4HG0411270
HORVU_MOREX_r3_3HG0303330
HORVU_MOREX_r3_5HG0498140
HORVU_MOREX_r3_3HG0265330
HORVU_MOREX_r3_2HG0104500
novel.3683
HORVU_MOREX_r3_2HG0112890
HORVU_MOREX_r3_5HG0526590
HORVU_MOREX_r3_7HG0706620
HORVU_MOREX_r3_2HG0161130
HORVU_MOREX_r3_3HG0232050
HORVU_MOREX_r3_3HG0286820
novel.1963
HORVU_MOREX_r3_4HG0405600
HORVU_MOREX_r3_2HG0166290
novel.4506
HORVU_MOREX_r3_6HG0584100
HORVU_MOREX_r3_4HG0398980
HORVU_MOREX_r3_2HG0150450
HORVU_MOREX_r3_2HG0123770
HORVU_MOREX_r3_7HG0665730
HORVU_MOREX_r3_6HG0622490
novel.1045
HORVU_MOREX_r3_1HG0032140
novel.6040
HORVU_MOREX_r3_7HG0665540
HORVU_MOREX_r3_1HG0081980
HORVU_MOREX_r3_3HG0275990
HORVU_MOREX_r3_6HG0593790
novel.2047
HORVU_MOREX_r3_5HG0512200
HORVU_MOREX_r3_3HG0309270
HORVU_MOREX_r3_5HG0429630
HORVU_MOREX_r3_2HG0125330
HORVU_MOREX_r3_2HG0150730
HORVU_MOREX_r3_1HG0073840
HORVU_MOREX_r3_2HG0197130
novel.6923
HORVU_MOREX_r3_6HG0580890
novel.6220
HORVU_MOREX_r3_2HG0205760
HORVU_MOREX_r3_5HG0452570
HORVU_MOREX_r3_3HG0230640
HORVU_MOREX_r3_3HG0329300
HORVU_MOREX_r3_4HG0352600
HORVU_MOREX_r3_4HG0391070
HORVU_MOREX_r3_4HG0393080
HORVU_MOREX_r3_3HG0290950
HORVU_MOREX_r3_2HG0181800
HORVU_MOREX_r3_1HG0034480
HORVU_MOREX_r3_5HG0472770
HORVU_MOREX_r3_3HG0273280
HORVU_MOREX_r3_2HG0103720
HORVU_MOREX_r3_2HG0165510
HORVU_MOREX_r3_7HG0686950
HORVU_MOREX_r3_4HG0394970
HORVU_MOREX_r3_6HG0616740
HORVU_MOREX_r3_1HG0039940
HORVU_MOREX_r3_2HG0178550
HORVU_MOREX_r3_5HG0453710
HORVU_MOREX_r3_4HG0345380
HORVU_MOREX_r3_3HG0306130
HORVU_MOREX_r3_1HG0064320
HORVU_MOREX_r3_1HG0020820
HORVU_MOREX_r3_2HG0191650
HORVU_MOREX_r3_5HG0527260
novel.1142
HORVU_MOREX_r3_6HG0598940
HORVU_MOREX_r3_1HG0062370
HORVU_MOREX_r3_7HG0728850
HORVU_MOREX_r3_3HG0287560
HORVU_MOREX_r3_4HG0408620
HORVU_MOREX_r3_2HG0099900
HORVU_MOREX_r3_2HG0108540
HORVU_MOREX_r3_5HG0533720
HORVU_MOREX_r3_6HG0556720
HORVU_MOREX_r3_3HG0313430
HORVU_MOREX_r3_4HG0411020
HORVU_MOREX_r3_2HG0205980
HORVU_MOREX_r3_3HG0238970
HORVU_MOREX_r3_2HG0183450
HORVU_MOREX_r3_1HG0087810
HORVU_MOREX_r3_6HG0601400
HORVU_MOREX_r3_4HG0388700
HORVU_MOREX_r3_2HG0195100
HORVU_MOREX_r3_1HG0041260
novel.2406
novel.1005
HORVU_MOREX_r3_5HG0478010
HORVU_MOREX_r3_1HG0081100
HORVU_MOREX_r3_4HG0395120
HORVU_MOREX_r3_7HG0728720
HORVU_MOREX_r3_4HG0345580
HORVU_MOREX_r3_5HG0491150
novel.1445
HORVU_MOREX_r3_5HG0490320
novel.5255
HORVU_MOREX_r3_1HG0077390
HORVU_MOREX_r3_6HG0593480
HORVU_MOREX_r3_7HG0655170
HORVU_MOREX_r3_3HG0272160
HORVU_MOREX_r3_6HG0615210
HORVU_MOREX_r3_4HG0354240
HORVU_MOREX_r3_5HG0497560
HORVU_MOREX_r3_5HG0528510
HORVU_MOREX_r3_2HG0143570
novel.73
HORVU_MOREX_r3_2HG0177570
HORVU_MOREX_r3_1HG0055360
HORVU_MOREX_r3_2HG0135210
HORVU_MOREX_r3_5HG0457980
HORVU_MOREX_r3_4HG0406020
HORVU_MOREX_r3_2HG0177810
HORVU_MOREX_r3_5HG0530230
HORVU_MOREX_r3_3HG0274910
HORVU_MOREX_r3_5HG0463880
HORVU_MOREX_r3_5HG0534480
HORVU_MOREX_r3_5HG0504770
novel.1009
HORVU_MOREX_r3_5HG0520250
HORVU_MOREX_r3_5HG0488750
HORVU_MOREX_r3_4HG0335780
HORVU_MOREX_r3_5HG0493890
HORVU_MOREX_r3_5HG0537130
HORVU_MOREX_r3_4HG0370720
novel.2809
HORVU_MOREX_r3_1HG0031320
HORVU_MOREX_r3_3HG0275710
HORVU_MOREX_r3_1HG0027000
HORVU_MOREX_r3_2HG0156150
HORVU_MOREX_r3_7HG0703420
HORVU_MOREX_r3_7HG0716290
HORVU_MOREX_r3_4HG0407520
HORVU_MOREX_r3_7HG0647380
HORVU_MOREX_r3_3HG0278120
HORVU_MOREX_r3_6HG0549780
HORVU_MOREX_r3_6HG0597040
HORVU_MOREX_r3_7HG0700250
HORVU_MOREX_r3_1HG0085120
HORVU_MOREX_r3_2HG0100760
HORVU_MOREX_r3_6HG0599190
HORVU_MOREX_r3_4HG0386280
HORVU_MOREX_r3_1HG0095070
HORVU_MOREX_r3_3HG0232930
HORVU_MOREX_r3_5HG0439960
novel.5686
HORVU_MOREX_r3_4HG0406120
HORVU_MOREX_r3_2HG0100230
HORVU_MOREX_r3_6HG0632850
novel.6770
HORVU_MOREX_r3_4HG0390230
HORVU_MOREX_r3_2HG0142000
HORVU_MOREX_r3_6HG0595860
HORVU_MOREX_r3_6HG0584530
HORVU_MOREX_r3_6HG0569540
HORVU_MOREX_r3_3HG0254640
HORVU_MOREX_r3_3HG0228870
HORVU_MOREX_r3_3HG0301010
HORVU_MOREX_r3_7HG0716330
HORVU_MOREX_r3_3HG0300480
HORVU_MOREX_r3_4HG0339720
HORVU_MOREX_r3_2HG0169260
novel.125
HORVU_MOREX_r3_7HG0740200
HORVU_MOREX_r3_7HG0680970
HORVU_MOREX_r3_4HG0396280
HORVU_MOREX_r3_3HG0233230
HORVU_MOREX_r3_4HG0344580
HORVU_MOREX_r3_7HG0695720
HORVU_MOREX_r3_4HG0397850
HORVU_MOREX_r3_6HG0600810
HORVU_MOREX_r3_2HG0145810
HORVU_MOREX_r3_3HG0310750
novel.2821
HORVU_MOREX_r3_1HG0061180
HORVU_MOREX_r3_2HG0162320
HORVU_MOREX_r3_4HG0333130
HORVU_MOREX_r3_4HG0380080
HORVU_MOREX_r3_5HG0445020
HORVU_MOREX_r3_6HG0614660
HORVU_MOREX_r3_3HG0321700
HORVU_MOREX_r3_6HG0593780
HORVU_MOREX_r3_7HG0701250
HORVU_MOREX_r3_2HG0107970
HORVU_MOREX_r3_4HG0392430
HORVU_MOREX_r3_7HG0679610
HORVU_MOREX_r3_7HG0726800
HORVU_MOREX_r3_3HG0247920
HORVU_MOREX_r3_3HG0286440
HORVU_MOREX_r3_1HG0008510
HORVU_MOREX_r3_7HG0746340
HORVU_MOREX_r3_5HG0474780
HORVU_MOREX_r3_6HG0615750
HORVU_MOREX_r3_1HG0008650
HORVU_MOREX_r3_7HG0665880
HORVU_MOREX_r3_3HG0268620
HORVU_MOREX_r3_1HG0033590
HORVU_MOREX_r3_7HG0689310
HORVU_MOREX_r3_7HG0713180
HORVU_MOREX_r3_1HG0044640
HORVU_MOREX_r3_2HG0144620
HORVU_MOREX_r3_6HG0624290
HORVU_MOREX_r3_6HG0629840
HORVU_MOREX_r3_6HG0612910
HORVU_MOREX_r3_3HG0245320
HORVU_MOREX_r3_5HG0446890
HORVU_MOREX_r3_2HG0133880
HORVU_MOREX_r3_2HG0152160
HORVU_MOREX_r3_4HG0389480
HORVU_MOREX_r3_3HG0310400
HORVU_MOREX_r3_4HG0375390
novel.119
HORVU_MOREX_r3_1HG0056500
HORVU_MOREX_r3_4HG0418170
HORVU_MOREX_r3_5HG0495020
HORVU_MOREX_r3_4HG0336850
HORVU_MOREX_r3_3HG0306830
HORVU_MOREX_r3_2HG0186490
HORVU_MOREX_r3_3HG0327850
HORVU_MOREX_r3_2HG0194820
HORVU_MOREX_r3_2HG0122060
HORVU_MOREX_r3_7HG0710890
HORVU_MOREX_r3_5HG0467820
HORVU_MOREX_r3_3HG0301960
HORVU_MOREX_r3_6HG0611040
HORVU_MOREX_r3_3HG0330990
HORVU_MOREX_r3_4HG0393120
HORVU_MOREX_r3_3HG0309760
novel.4958
HORVU_MOREX_r3_2HG0143810
HORVU_MOREX_r3_1HG0063060
HORVU_MOREX_r3_1HG0046180
HORVU_MOREX_r3_4HG0348500
HORVU_MOREX_r3_7HG0686000
HORVU_MOREX_r3_6HG0597760
HORVU_MOREX_r3_6HG0569450
HORVU_MOREX_r3_2HG0146160
HORVU_MOREX_r3_3HG0270620
HORVU_MOREX_r3_7HG0707060
HORVU_MOREX_r3_5HG0454190
HORVU_MOREX_r3_7HG0657400
HORVU_MOREX_r3_3HG0288020
HORVU_MOREX_r3_4HG0391610
HORVU_MOREX_r3_1HG0024210
HORVU_MOREX_r3_2HG0099980
novel.4380
HORVU_MOREX_r3_1HG0055640
HORVU_MOREX_r3_7HG0717060
HORVU_MOREX_r3_4HG0351550
HORVU_MOREX_r3_5HG0519680
novel.3430
HORVU_MOREX_r3_7HG0694520
HORVU_MOREX_r3_3HG0290860
HORVU_MOREX_r3_7HG0634590
HORVU_MOREX_r3_7HG0738340
HORVU_MOREX_r3_3HG0250200
HORVU_MOREX_r3_7HG0709150
HORVU_MOREX_r3_3HG0265300
HORVU_MOREX_r3_4HG0337220
HORVU_MOREX_r3_3HG0255880
HORVU_MOREX_r3_2HG0130770
HORVU_MOREX_r3_5HG0493330
HORVU_MOREX_r3_3HG0288240
novel.1319
HORVU_MOREX_r3_6HG0605880
HORVU_MOREX_r3_2HG0127530
HORVU_MOREX_r3_6HG0575580
HORVU_MOREX_r3_5HG0454920
HORVU_MOREX_r3_3HG0323260
HORVU_MOREX_r3_5HG0420920
HORVU_MOREX_r3_6HG0609720
HORVU_MOREX_r3_5HG0456510
HORVU_MOREX_r3_2HG0121520
HORVU_MOREX_r3_5HG0429360
HORVU_MOREX_r3_2HG0186400
HORVU_MOREX_r3_6HG0604210
HORVU_MOREX_r3_3HG0298680
HORVU_MOREX_r3_1HG0043640
HORVU_MOREX_r3_6HG0591930
novel.3887
HORVU_MOREX_r3_5HG0428260
HORVU_MOREX_r3_6HG0615590
novel.4483
novel.4826
HORVU_MOREX_r3_2HG0197860
HORVU_MOREX_r3_3HG0227700
HORVU_MOREX_r3_1HG0066870
HORVU_MOREX_r3_7HG0723210
HORVU_MOREX_r3_2HG0117100
HORVU_MOREX_r3_7HG0711170
HORVU_MOREX_r3_1HG0063810
HORVU_MOREX_r3_7HG0745160
HORVU_MOREX_r3_3HG0281540
HORVU_MOREX_r3_6HG0622440
HORVU_MOREX_r3_1HG0081220
HORVU_MOREX_r3_7HG0683980
HORVU_MOREX_r3_5HG0471340
novel.3892
novel.6658
HORVU_MOREX_r3_5HG0478340
HORVU_MOREX_r3_4HG0397510
HORVU_MOREX_r3_4HG0390280
HORVU_MOREX_r3_7HG0744790
HORVU_MOREX_r3_5HG0522410
HORVU_MOREX_r3_7HG0675850
HORVU_MOREX_r3_5HG0446790
HORVU_MOREX_r3_5HG0490710
HORVU_MOREX_r3_1HG0010650
HORVU_MOREX_r3_4HG0416170
HORVU_MOREX_r3_2HG0185980
novel.3074
HORVU_MOREX_r3_1HG0027930
HORVU_MOREX_r3_5HG0496010
HORVU_MOREX_r3_7HG0710820
HORVU_MOREX_r3_7HG0648750
HORVU_MOREX_r3_3HG0276340
HORVU_MOREX_r3_2HG0132440
HORVU_MOREX_r3_1HG0064310
HORVU_MOREX_r3_2HG0119120
HORVU_MOREX_r3_2HG0176950
HORVU_MOREX_r3_5HG0532660
HORVU_MOREX_r3_3HG0265880
HORVU_MOREX_r3_2HG0178210
HORVU_MOREX_r3_3HG0282780
HORVU_MOREX_r3_5HG0457710
novel.6641
HORVU_MOREX_r3_5HG0444270
HORVU_MOREX_r3_4HG0376550
HORVU_MOREX_r3_4HG0334110
HORVU_MOREX_r3_5HG0496250
HORVU_MOREX_r3_5HG0525760
HORVU_MOREX_r3_6HG0607130
HORVU_MOREX_r3_2HG0207370
HORVU_MOREX_r3_1HG0054070
HORVU_MOREX_r3_7HG0732490
HORVU_MOREX_r3_7HG0645710
HORVU_MOREX_r3_7HG0711850
HORVU_MOREX_r3_2HG0145370
HORVU_MOREX_r3_5HG0440720
HORVU_MOREX_r3_7HG0703450
HORVU_MOREX_r3_7HG0636900
HORVU_MOREX_r3_7HG0720840
HORVU_MOREX_r3_2HG0184780
HORVU_MOREX_r3_6HG0606940
HORVU_MOREX_r3_6HG0632090
HORVU_MOREX_r3_5HG0535010
HORVU_MOREX_r3_4HG0390750
HORVU_MOREX_r3_3HG0255490
HORVU_MOREX_r3_5HG0506790
HORVU_MOREX_r3_5HG0511130
HORVU_MOREX_r3_3HG0239650
HORVU_MOREX_r3_2HG0158290
HORVU_MOREX_r3_2HG0203600
HORVU_MOREX_r3_5HG0497830
novel.4531
HORVU_MOREX_r3_7HG0687190
HORVU_MOREX_r3_7HG0692050
HORVU_MOREX_r3_1HG0093440
HORVU_MOREX_r3_6HG0609370
HORVU_MOREX_r3_6HG0542720
HORVU_MOREX_r3_5HG0441020
HORVU_MOREX_r3_7HG0648620
HORVU_MOREX_r3_7HG0744670
HORVU_MOREX_r3_5HG0471380
HORVU_MOREX_r3_3HG0240600
HORVU_MOREX_r3_7HG0665830
HORVU_MOREX_r3_5HG0510440
HORVU_MOREX_r3_3HG0243220
HORVU_MOREX_r3_6HG0585150
HORVU_MOREX_r3_7HG0736140
novel.5332
HORVU_MOREX_r3_2HG0154160
HORVU_MOREX_r3_7HG0641780
HORVU_MOREX_r3_4HG0378050
HORVU_MOREX_r3_5HG0505460
HORVU_MOREX_r3_3HG0301780
HORVU_MOREX_r3_3HG0292100
HORVU_MOREX_r3_5HG0431360
HORVU_MOREX_r3_3HG0286350
HORVU_MOREX_r3_5HG0495950
HORVU_MOREX_r3_5HG0479860
HORVU_MOREX_r3_3HG0285900
HORVU_MOREX_r3_4HG0387070
novel.980
HORVU_MOREX_r3_2HG0170690
HORVU_MOREX_r3_7HG0678220
HORVU_MOREX_r3_2HG0111130
HORVU_MOREX_r3_6HG0564510
HORVU_MOREX_r3_2HG0166550
HORVU_MOREX_r3_4HG0347650
HORVU_MOREX_r3_6HG0546130
HORVU_MOREX_r3_2HG0207030
HORVU_MOREX_r3_3HG0309650
HORVU_MOREX_r3_6HG0612260
HORVU_MOREX_r3_5HG0484240
novel.5871
HORVU_MOREX_r3_5HG0495630
HORVU_MOREX_r3_3HG0242950
novel.4646
HORVU_MOREX_r3_3HG0299110
HORVU_MOREX_r3_2HG0100080
HORVU_MOREX_r3_2HG0198790
HORVU_MOREX_r3_5HG0464370
HORVU_MOREX_r3_1HG0083650
novel.2057
HORVU_MOREX_r3_2HG0161580
HORVU_MOREX_r3_4HG0403490
novel.5116
HORVU_MOREX_r3_5HG0514410
HORVU_MOREX_r3_2HG0157090
HORVU_MOREX_r3_2HG0142540
HORVU_MOREX_r3_6HG0623930
HORVU_MOREX_r3_5HG0486720
HORVU_MOREX_r3_2HG0105180
HORVU_MOREX_r3_7HG0700290
HORVU_MOREX_r3_5HG0424970
HORVU_MOREX_r3_2HG0178720
novel.5555
HORVU_MOREX_r3_5HG0428250
HORVU_MOREX_r3_4HG0378080
HORVU_MOREX_r3_6HG0626110
HORVU_MOREX_r3_5HG0436820
HORVU_MOREX_r3_2HG0189340
HORVU_MOREX_r3_6HG0538270
HORVU_MOREX_r3_6HG0551650
HORVU_MOREX_r3_3HG0268180
HORVU_MOREX_r3_6HG0627100
HORVU_MOREX_r3_2HG0172900
HORVU_MOREX_r3_5HG0468840
HORVU_MOREX_r3_2HG0181870
novel.359
HORVU_MOREX_r3_7HG0720560
HORVU_MOREX_r3_7HG0648720
HORVU_MOREX_r3_3HG0298390
HORVU_MOREX_r3_3HG0282210
HORVU_MOREX_r3_4HG0404080
HORVU_MOREX_r3_7HG0708130
HORVU_MOREX_r3_3HG0236000
novel.6816
HORVU_MOREX_r3_1HG0078010
HORVU_MOREX_r3_3HG0245460
HORVU_MOREX_r3_3HG0255230
HORVU_MOREX_r3_6HG0577600
HORVU_MOREX_r3_7HG0641160
novel.5900
HORVU_MOREX_r3_7HG0651170
HORVU_MOREX_r3_3HG0285170
HORVU_MOREX_r3_3HG0298020
HORVU_MOREX_r3_3HG0325670
HORVU_MOREX_r3_1HG0093970
HORVU_MOREX_r3_3HG0312320
HORVU_MOREX_r3_7HG0751410
HORVU_MOREX_r3_7HG0674990
HORVU_MOREX_r3_7HG0690890
novel.6247
HORVU_MOREX_r3_3HG0303320
novel.2418
novel.4121
HORVU_MOREX_r3_5HG0513290
novel.1708
HORVU_MOREX_r3_5HG0485530
HORVU_MOREX_r3_2HG0196720
HORVU_MOREX_r3_5HG0420330
novel.7210
HORVU_MOREX_r3_2HG0188820
novel.3738
HORVU_MOREX_r3_4HG0331240
HORVU_MOREX_r3_7HG0678240
novel.1865
HORVU_MOREX_r3_7HG0712740
novel.4160
novel.3963
HORVU_MOREX_r3_4HG0417080
HORVU_MOREX_r3_6HG0571620
HORVU_MOREX_r3_2HG0202730
HORVU_MOREX_r3_5HG0522060
novel.3896
novel.4977
HORVU_MOREX_r3_4HG0416160
HORVU_MOREX_r3_7HG0716210
HORVU_MOREX_r3_1HG0086170
HORVU_MOREX_r3_5HG0480820
HORVU_MOREX_r3_2HG0207120
HORVU_MOREX_r3_4HG0382420
HORVU_MOREX_r3_1HG0067010
novel.7316
novel.3680
HORVU_MOREX_r3_5HG0499880
HORVU_MOREX_r3_4HG0340960
HORVU_MOREX_r3_5HG0426160
HORVU_MOREX_r3_7HG0708100
novel.6501
HORVU_MOREX_r3_2HG0183310
HORVU_MOREX_r3_6HG0574610
HORVU_MOREX_r3_5HG0535440
HORVU_MOREX_r3_6HG0619490
HORVU_MOREX_r3_2HG0121010
HORVU_MOREX_r3_7HG0637290
HORVU_MOREX_r3_2HG0132830
HORVU_MOREX_r3_7HG0663370
HORVU_MOREX_r3_2HG0098070
HORVU_MOREX_r3_7HG0660400
HORVU_MOREX_r3_5HG0508300
novel.6542
HORVU_MOREX_r3_5HG0465260
HORVU_MOREX_r3_3HG0294280
HORVU_MOREX_r3_5HG0537970
HORVU_MOREX_r3_7HG0681220
HORVU_MOREX_r3_2HG0111880
novel.1195
HORVU_MOREX_r3_7HG0702850
HORVU_MOREX_r3_7HG0659690
HORVU_MOREX_r3_7HG0714980
HORVU_MOREX_r3_1HG0057810
HORVU_MOREX_r3_2HG0185130
HORVU_MOREX_r3_2HG0107790
HORVU_MOREX_r3_5HG0525750
novel.2833
HORVU_MOREX_r3_3HG0287840
HORVU_MOREX_r3_4HG0392390
HORVU_MOREX_r3_2HG0104480
HORVU_MOREX_r3_3HG0310530
HORVU_MOREX_r3_3HG0302700
novel.1237
HORVU_MOREX_r3_7HG0724870
HORVU_MOREX_r3_7HG0724740
HORVU_MOREX_r3_6HG0565800
HORVU_MOREX_r3_2HG0129990
HORVU_MOREX_r3_2HG0104680
HORVU_MOREX_r3_2HG0126390
HORVU_MOREX_r3_7HG0659440
novel.195
novel.114
HORVU_MOREX_r3_3HG0309780
novel.451
HORVU_MOREX_r3_7HG0644570
HORVU_MOREX_r3_1HG0074040
novel.3676
HORVU_MOREX_r3_3HG0288010
HORVU_MOREX_r3_3HG0310060
novel.6159
HORVU_MOREX_r3_1HG0091050
HORVU_MOREX_r3_5HG0458120
novel.3681
novel.4455
HORVU_MOREX_r3_5HG0480200
HORVU_MOREX_r3_4HG0355230
HORVU_MOREX_r3_4HG0347230
novel.4950
HORVU_MOREX_r3_2HG0157790
HORVU_MOREX_r3_7HG0666340
HORVU_MOREX_r3_1HG0011020
HORVU_MOREX_r3_7HG0717270
novel.275
novel.1766
HORVU_MOREX_r3_4HG0331670
novel.4343
novel.1909
novel.1772
HORVU_MOREX_r3_7HG0683020
HORVU_MOREX_r3_3HG0312530
novel.1351
novel.4492
HORVU_MOREX_r3_2HG0189950
HORVU_MOREX_r3_1HG0048840
novel.83
novel.580
HORVU_MOREX_r3_5HG0508630
novel.6587
novel.5079
HORVU_MOREX_r3_1HG0016590
novel.2966
novel.7300
novel.3972
HORVU_MOREX_r3_4HG0358390
HORVU_MOREX_r3_7HG0749430
HORVU_MOREX_r3_2HG0210650
HORVU_MOREX_r3_4HG0339390
novel.7271
HORVU_MOREX_r3_7HG0681830
HORVU_MOREX_r3_2HG0207310
HORVU_MOREX_r3_6HG0555650
HORVU_MOREX_r3_4HG0332710
novel.697
HORVU_MOREX_r3_3HG0292610
novel.6512
novel.1848
novel.4076
novel.1201
novel.6847
novel.551
novel.4734
novel.6566
novel.7177
HORVU_MOREX_r3_3HG0241660
HORVU_MOREX_r3_4HG0378330
HORVU_MOREX_r3_5HG0463700
novel.5491
novel.1724
HORVU_MOREX_r3_1HG0059410
novel.172
HORVU_MOREX_r3_1HG0070590
novel.1489
HORVU_MOREX_r3_5HG0485730
HORVU_MOREX_r3_2HG0169040
HORVU_MOREX_r3_1HG0018200
HORVU_MOREX_r3_7HG0686960
HORVU_MOREX_r3_7HG0707050
novel.1712
HORVU_MOREX_r3_7HG0666770
HORVU_MOREX_r3_3HG0270450
novel.3340
novel.3568
HORVU_MOREX_r3_2HG0114720
HORVU_MOREX_r3_3HG0271180
HORVU_MOREX_r3_4HG0404970
novel.4627
HORVU_MOREX_r3_6HG0614650
HORVU_MOREX_r3_2HG0101800
novel.5590
HORVU_MOREX_r3_5HG0459770
HORVU_MOREX_r3_3HG0258640
novel.3858
novel.3595
novel.3856
novel.1083
HORVU_MOREX_r3_2HG0180210
novel.4685
HORVU_MOREX_r3_1HG0049050
HORVU_MOREX_r3_7HG0684990
HORVU_MOREX_r3_5HG0489890
HORVU_MOREX_r3_4HG0345440
HORVU_MOREX_r3_5HG0485520
novel.1402
HORVU_MOREX_r3_3HG0300660
novel.1437
novel.3502
novel.3615
novel.7376
novel.6592
HORVU_MOREX_r3_4HG0393760
HORVU_MOREX_r3_3HG0302070
novel.3882
HORVU_MOREX_r3_3HG0279020
HORVU_MOREX_r3_3HG0309200
HORVU_MOREX_r3_5HG0484530
HORVU_MOREX_r3_2HG0124240
novel.1596
novel.2052
novel.1851
novel.1574
novel.348
novel.6032
novel.1468
HORVU_MOREX_r3_1HG0053690
novel.6590
HORVU_MOREX_r3_7HG0730890
novel.7109
HORVU_MOREX_r3_3HG0222180
HORVU_MOREX_r3_7HG0719850
HORVU_MOREX_r3_2HG0161790
novel.650
novel.1575
HORVU_MOREX_r3_3HG0267870
HORVU_MOREX_r3_4HG0397990
novel.3208
HORVU_MOREX_r3_3HG0280050
novel.4540
HORVU_MOREX_r3_2HG0171780
HORVU_MOREX_r3_5HG0455770
novel.2420
novel.2383
HORVU_MOREX_r3_5HG0502580
HORVU_MOREX_r3_2HG0144990
novel.6539
novel.3591
HORVU_MOREX_r3_7HG0736210
HORVU_MOREX_r3_5HG0489530
HORVU_MOREX_r3_6HG0540420
novel.4730
HORVU_MOREX_r3_2HG0205050
HORVU_MOREX_r3_1HG0092280
HORVU_MOREX_r3_4HG0346180
HORVU_MOREX_r3_5HG0508200
HORVU_MOREX_r3_1HG0043450
HORVU_MOREX_r3_1HG0038720
novel.2412
novel.4708
HORVU_MOREX_r3_5HG0426330
HORVU_MOREX_r3_3HG0226810
HORVU_MOREX_r3_7HG0681960
novel.38
HORVU_MOREX_r3_3HG0309110
HORVU_MOREX_r3_2HG0157550

## Sheet: black_gene_list
HORVU_MOREX_r3_4HG0357980
HORVU_MOREX_r3_7HG0661680
HORVU_MOREX_r3_5HG0473560
HORVU_MOREX_r3_3HG0309300
HORVU_MOREX_r3_3HG0326880
HORVU_MOREX_r3_3HG0326310
HORVU_MOREX_r3_6HG0631370
HORVU_MOREX_r3_3HG0318380
HORVU_MOREX_r3_3HG0319100
HORVU_MOREX_r3_5HG0473580
HORVU_MOREX_r3_2HG0186150
HORVU_MOREX_r3_6HG0617080
HORVU_MOREX_r3_5HG0480710
HORVU_MOREX_r3_2HG0122600
HORVU_MOREX_r3_3HG0318820
HORVU_MOREX_r3_3HG0306040
HORVU_MOREX_r3_1HG0071020
HORVU_MOREX_r3_5HG0423130
HORVU_MOREX_r3_1HG0075620
HORVU_MOREX_r3_5HG0423100
HORVU_MOREX_r3_6HG0551770
HORVU_MOREX_r3_7HG0728380
HORVU_MOREX_r3_5HG0527960
HORVU_MOREX_r3_4HG0333410
HORVU_MOREX_r3_6HG0617130
HORVU_MOREX_r3_7HG0689920
HORVU_MOREX_r3_4HG0392440
HORVU_MOREX_r3_6HG0555660
HORVU_MOREX_r3_5HG0501870
HORVU_MOREX_r3_1HG0051220
HORVU_MOREX_r3_2HG0212570
HORVU_MOREX_r3_6HG0547570
novel.7044
HORVU_MOREX_r3_3HG0277190
HORVU_MOREX_r3_2HG0104650
HORVU_MOREX_r3_1HG0073650
HORVU_MOREX_r3_3HG0319990
HORVU_MOREX_r3_6HG0612960
novel.7434
HORVU_MOREX_r3_6HG0545620
HORVU_MOREX_r3_4HG0346720
HORVU_MOREX_r3_5HG0465530
HORVU_MOREX_r3_4HG0406770
HORVU_MOREX_r3_5HG0530190
HORVU_MOREX_r3_4HG0400000
HORVU_MOREX_r3_3HG0245060
HORVU_MOREX_r3_1HG0089770
HORVU_MOREX_r3_3HG0266020
HORVU_MOREX_r3_3HG0299830
HORVU_MOREX_r3_5HG0488970
HORVU_MOREX_r3_6HG0613170
novel.3400
HORVU_MOREX_r3_4HG0380710
HORVU_MOREX_r3_6HG0575530
HORVU_MOREX_r3_5HG0420070
HORVU_MOREX_r3_5HG0522100
HORVU_MOREX_r3_2HG0178930
HORVU_MOREX_r3_7HG0731110
HORVU_MOREX_r3_4HG0411460
HORVU_MOREX_r3_5HG0444200
HORVU_MOREX_r3_7HG0701640
HORVU_MOREX_r3_1HG0048010
HORVU_MOREX_r3_5HG0496630
HORVU_MOREX_r3_1HG0092810
HORVU_MOREX_r3_5HG0444170
HORVU_MOREX_r3_5HG0470200
HORVU_MOREX_r3_3HG0241900
HORVU_MOREX_r3_4HG0380120
HORVU_MOREX_r3_5HG0485800
HORVU_MOREX_r3_5HG0477470
HORVU_MOREX_r3_5HG0512800
HORVU_MOREX_r3_4HG0411100
HORVU_MOREX_r3_3HG0224820
HORVU_MOREX_r3_5HG0494070
HORVU_MOREX_r3_3HG0318650
HORVU_MOREX_r3_7HG0708320
HORVU_MOREX_r3_2HG0215650
HORVU_MOREX_r3_4HG0404850
HORVU_MOREX_r3_7HG0666830
HORVU_MOREX_r3_3HG0295570
HORVU_MOREX_r3_4HG0412490
HORVU_MOREX_r3_1HG0026240
HORVU_MOREX_r3_5HG0444150
HORVU_MOREX_r3_4HG0350220
HORVU_MOREX_r3_7HG0738680
HORVU_MOREX_r3_6HG0573820
HORVU_MOREX_r3_1HG0056160
HORVU_MOREX_r3_2HG0161410
HORVU_MOREX_r3_4HG0358620
novel.2019
HORVU_MOREX_r3_1HG0085210
HORVU_MOREX_r3_2HG0107480
HORVU_MOREX_r3_4HG0382110
HORVU_MOREX_r3_3HG0315410
HORVU_MOREX_r3_1HG0059140
HORVU_MOREX_r3_4HG0380730
HORVU_MOREX_r3_4HG0366020
HORVU_MOREX_r3_5HG0498210
HORVU_MOREX_r3_2HG0139310
HORVU_MOREX_r3_4HG0409180
HORVU_MOREX_r3_3HG0291590
HORVU_MOREX_r3_6HG0555700
HORVU_MOREX_r3_5HG0512600
HORVU_MOREX_r3_3HG0244630
HORVU_MOREX_r3_3HG0234680
HORVU_MOREX_r3_4HG0364490
HORVU_MOREX_r3_7HG0651110
HORVU_MOREX_r3_5HG0444140
HORVU_MOREX_r3_7HG0685360
HORVU_MOREX_r3_3HG0312560
HORVU_MOREX_r3_5HG0527570
HORVU_MOREX_r3_3HG0300580
HORVU_MOREX_r3_5HG0496880
HORVU_MOREX_r3_3HG0320840
HORVU_MOREX_r3_3HG0224810
HORVU_MOREX_r3_2HG0170580
HORVU_MOREX_r3_3HG0315260
HORVU_MOREX_r3_7HG0740050
HORVU_MOREX_r3_3HG0322050
HORVU_MOREX_r3_3HG0308640
HORVU_MOREX_r3_5HG0446870
HORVU_MOREX_r3_7HG0736410
HORVU_MOREX_r3_1HG0083440
HORVU_MOREX_r3_1HG0092880
HORVU_MOREX_r3_1HG0001280
HORVU_MOREX_r3_3HG0234210
HORVU_MOREX_r3_7HG0642210
HORVU_MOREX_r3_7HG0708000
HORVU_MOREX_r3_2HG0147190
HORVU_MOREX_r3_5HG0512820
HORVU_MOREX_r3_5HG0497220
HORVU_MOREX_r3_2HG0172990
HORVU_MOREX_r3_1HG0041630
HORVU_MOREX_r3_4HG0408170
HORVU_MOREX_r3_6HG0605060
novel.2967
HORVU_MOREX_r3_4HG0360670
HORVU_MOREX_r3_7HG0724560
HORVU_MOREX_r3_5HG0467660
HORVU_MOREX_r3_6HG0616240
HORVU_MOREX_r3_5HG0513630
HORVU_MOREX_r3_1HG0030080
HORVU_MOREX_r3_2HG0106380
HORVU_MOREX_r3_7HG0722940
HORVU_MOREX_r3_5HG0489610
HORVU_MOREX_r3_3HG0315590
HORVU_MOREX_r3_5HG0511630
HORVU_MOREX_r3_1HG0036600
HORVU_MOREX_r3_7HG0723770
HORVU_MOREX_r3_3HG0328990
HORVU_MOREX_r3_6HG0574880
HORVU_MOREX_r3_6HG0623490
HORVU_MOREX_r3_7HG0743100
HORVU_MOREX_r3_6HG0617100
HORVU_MOREX_r3_4HG0356690
HORVU_MOREX_r3_1HG0045660
HORVU_MOREX_r3_1HG0052110
HORVU_MOREX_r3_5HG0479110
HORVU_MOREX_r3_3HG0306170
HORVU_MOREX_r3_2HG0152110
HORVU_MOREX_r3_3HG0220760
novel.6593
HORVU_MOREX_r3_6HG0616340
HORVU_MOREX_r3_1HG0061280
HORVU_MOREX_r3_7HG0739190
HORVU_MOREX_r3_3HG0319010
HORVU_MOREX_r3_5HG0504710
HORVU_MOREX_r3_5HG0510210
HORVU_MOREX_r3_3HG0316030
HORVU_MOREX_r3_7HG0714930
HORVU_MOREX_r3_6HG0605120
HORVU_MOREX_r3_7HG0651920
HORVU_MOREX_r3_7HG0689170
HORVU_MOREX_r3_3HG0220030
HORVU_MOREX_r3_6HG0542640
HORVU_MOREX_r3_6HG0543200
HORVU_MOREX_r3_7HG0747750
HORVU_MOREX_r3_1HG0089900
HORVU_MOREX_r3_5HG0444080
HORVU_MOREX_r3_4HG0382620
HORVU_MOREX_r3_4HG0378120
HORVU_MOREX_r3_3HG0245480
HORVU_MOREX_r3_2HG0209090
HORVU_MOREX_r3_3HG0281100
HORVU_MOREX_r3_2HG0158180
HORVU_MOREX_r3_3HG0300130
HORVU_MOREX_r3_4HG0331500
HORVU_MOREX_r3_4HG0339960
HORVU_MOREX_r3_6HG0604400
HORVU_MOREX_r3_3HG0228170
HORVU_MOREX_r3_2HG0158890
HORVU_MOREX_r3_1HG0056780
HORVU_MOREX_r3_5HG0530200
HORVU_MOREX_r3_7HG0747720
HORVU_MOREX_r3_4HG0333770
HORVU_MOREX_r3_1HG0054160
HORVU_MOREX_r3_7HG0666290
HORVU_MOREX_r3_7HG0708710
HORVU_MOREX_r3_4HG0333020
HORVU_MOREX_r3_5HG0532960
HORVU_MOREX_r3_4HG0415550
HORVU_MOREX_r3_3HG0312200
HORVU_MOREX_r3_2HG0173090
HORVU_MOREX_r3_4HG0379260
HORVU_MOREX_r3_3HG0279950
HORVU_MOREX_r3_1HG0017930
HORVU_MOREX_r3_7HG0654910
HORVU_MOREX_r3_7HG0657470
HORVU_MOREX_r3_1HG0079910
novel.110
HORVU_MOREX_r3_5HG0510240
HORVU_MOREX_r3_5HG0448780
HORVU_MOREX_r3_3HG0255530
HORVU_MOREX_r3_2HG0208520
HORVU_MOREX_r3_2HG0178010
HORVU_MOREX_r3_5HG0530810
HORVU_MOREX_r3_1HG0072670
HORVU_MOREX_r3_1HG0037670
HORVU_MOREX_r3_6HG0587120
HORVU_MOREX_r3_1HG0089780
HORVU_MOREX_r3_2HG0192630
HORVU_MOREX_r3_3HG0225960
HORVU_MOREX_r3_4HG0413510
HORVU_MOREX_r3_5HG0496860
HORVU_MOREX_r3_2HG0172400
HORVU_MOREX_r3_7HG0716320
HORVU_MOREX_r3_3HG0310660
HORVU_MOREX_r3_6HG0590820
HORVU_MOREX_r3_6HG0614480
HORVU_MOREX_r3_3HG0330020
HORVU_MOREX_r3_4HG0393020
HORVU_MOREX_r3_6HG0567430
HORVU_MOREX_r3_1HG0091390
HORVU_MOREX_r3_1HG0019410
HORVU_MOREX_r3_4HG0400940
HORVU_MOREX_r3_3HG0318900
HORVU_MOREX_r3_3HG0252170
HORVU_MOREX_r3_7HG0744250
HORVU_MOREX_r3_6HG0569780
HORVU_MOREX_r3_1HG0082040
HORVU_MOREX_r3_3HG0281400
HORVU_MOREX_r3_2HG0198460
HORVU_MOREX_r3_1HG0069130
novel.5118
HORVU_MOREX_r3_4HG0413270
novel.2223
HORVU_MOREX_r3_1HG0067410
HORVU_MOREX_r3_5HG0527070
novel.7344
HORVU_MOREX_r3_5HG0523250
HORVU_MOREX_r3_5HG0436680
HORVU_MOREX_r3_4HG0352020
HORVU_MOREX_r3_3HG0278130
HORVU_MOREX_r3_1HG0085320
HORVU_MOREX_r3_5HG0444110
novel.4809
HORVU_MOREX_r3_1HG0021350
HORVU_MOREX_r3_2HG0132360
HORVU_MOREX_r3_2HG0126220
HORVU_MOREX_r3_7HG0666130
HORVU_MOREX_r3_2HG0193690
HORVU_MOREX_r3_3HG0284830
HORVU_MOREX_r3_5HG0455240
HORVU_MOREX_r3_7HG0682170
HORVU_MOREX_r3_4HG0400030
HORVU_MOREX_r3_6HG0541540
HORVU_MOREX_r3_1HG0040000
HORVU_MOREX_r3_3HG0268090
HORVU_MOREX_r3_3HG0256910
HORVU_MOREX_r3_3HG0331030
HORVU_MOREX_r3_4HG0334480
HORVU_MOREX_r3_1HG0075700
HORVU_MOREX_r3_4HG0395270
HORVU_MOREX_r3_5HG0457870
HORVU_MOREX_r3_2HG0123810
HORVU_MOREX_r3_1HG0030290
HORVU_MOREX_r3_3HG0303820
HORVU_MOREX_r3_3HG0256400
HORVU_MOREX_r3_5HG0531010
HORVU_MOREX_r3_3HG0222090
HORVU_MOREX_r3_1HG0019970
HORVU_MOREX_r3_6HG0573850
HORVU_MOREX_r3_2HG0194120
HORVU_MOREX_r3_5HG0481630
HORVU_MOREX_r3_3HG0303900
HORVU_MOREX_r3_2HG0196780
HORVU_MOREX_r3_5HG0461160
HORVU_MOREX_r3_7HG0653740
HORVU_MOREX_r3_7HG0676720
HORVU_MOREX_r3_4HG0353780
HORVU_MOREX_r3_3HG0290820
novel.2064
HORVU_MOREX_r3_5HG0459320
HORVU_MOREX_r3_1HG0091080
HORVU_MOREX_r3_3HG0226230
HORVU_MOREX_r3_2HG0111480
HORVU_MOREX_r3_3HG0281310
HORVU_MOREX_r3_4HG0332150
HORVU_MOREX_r3_3HG0264700
HORVU_MOREX_r3_4HG0347840
HORVU_MOREX_r3_5HG0430130
HORVU_MOREX_r3_3HG0310070
HORVU_MOREX_r3_6HG0574770
HORVU_MOREX_r3_3HG0278670
HORVU_MOREX_r3_6HG0610190
HORVU_MOREX_r3_1HG0086790
HORVU_MOREX_r3_3HG0281340
HORVU_MOREX_r3_1HG0061420
HORVU_MOREX_r3_5HG0476330
novel.3184
HORVU_MOREX_r3_4HG0356600
HORVU_MOREX_r3_2HG0118770
novel.278
HORVU_MOREX_r3_2HG0111350
HORVU_MOREX_r3_3HG0279530
HORVU_MOREX_r3_7HG0723500
HORVU_MOREX_r3_4HG0391330
HORVU_MOREX_r3_1HG0019870
HORVU_MOREX_r3_2HG0107940
HORVU_MOREX_r3_2HG0097720
HORVU_MOREX_r3_5HG0499010
HORVU_MOREX_r3_7HG0715600
HORVU_MOREX_r3_3HG0233030
HORVU_MOREX_r3_5HG0474290
HORVU_MOREX_r3_7HG0671550
HORVU_MOREX_r3_4HG0337200
HORVU_MOREX_r3_6HG0579010
HORVU_MOREX_r3_2HG0217500
HORVU_MOREX_r3_1HG0074480
HORVU_MOREX_r3_3HG0306700
novel.1337
HORVU_MOREX_r3_3HG0280790
HORVU_MOREX_r3_1HG0024050
HORVU_MOREX_r3_1HG0067580
HORVU_MOREX_r3_5HG0476020
HORVU_MOREX_r3_6HG0595460
HORVU_MOREX_r3_4HG0367770
HORVU_MOREX_r3_2HG0172690
HORVU_MOREX_r3_5HG0538180
HORVU_MOREX_r3_3HG0253990
HORVU_MOREX_r3_2HG0217580
HORVU_MOREX_r3_2HG0133530
HORVU_MOREX_r3_7HG0714530
HORVU_MOREX_r3_1HG0083340
HORVU_MOREX_r3_7HG0736790
HORVU_MOREX_r3_1HG0056730
HORVU_MOREX_r3_3HG0251550
HORVU_MOREX_r3_5HG0481600
HORVU_MOREX_r3_3HG0233040
HORVU_MOREX_r3_7HG0671890
novel.6196
HORVU_MOREX_r3_2HG0216680
HORVU_MOREX_r3_4HG0338980
HORVU_MOREX_r3_2HG0176970
HORVU_MOREX_r3_6HG0550890
HORVU_MOREX_r3_6HG0606370
HORVU_MOREX_r3_2HG0201330
HORVU_MOREX_r3_6HG0600190
HORVU_MOREX_r3_6HG0594730
HORVU_MOREX_r3_4HG0409380
HORVU_MOREX_r3_5HG0430620
HORVU_MOREX_r3_6HG0622430
HORVU_MOREX_r3_6HG0612700
HORVU_MOREX_r3_7HG0707770
HORVU_MOREX_r3_4HG0405350
HORVU_MOREX_r3_1HG0093250
HORVU_MOREX_r3_1HG0007160
novel.4554
HORVU_MOREX_r3_7HG0740120
HORVU_MOREX_r3_2HG0116450
HORVU_MOREX_r3_6HG0541650
HORVU_MOREX_r3_6HG0631350
HORVU_MOREX_r3_2HG0188780
HORVU_MOREX_r3_6HG0627090
HORVU_MOREX_r3_1HG0039190
HORVU_MOREX_r3_3HG0226370
HORVU_MOREX_r3_7HG0709580
HORVU_MOREX_r3_7HG0700570
novel.6379
HORVU_MOREX_r3_6HG0545990
HORVU_MOREX_r3_5HG0430760
HORVU_MOREX_r3_4HG0396820
HORVU_MOREX_r3_1HG0035140
novel.5169
HORVU_MOREX_r3_5HG0533710
HORVU_MOREX_r3_4HG0412180
HORVU_MOREX_r3_7HG0667920
HORVU_MOREX_r3_2HG0159190
HORVU_MOREX_r3_2HG0198140
HORVU_MOREX_r3_2HG0202280
HORVU_MOREX_r3_5HG0444670
HORVU_MOREX_r3_5HG0502200
HORVU_MOREX_r3_1HG0077280
HORVU_MOREX_r3_3HG0297360
HORVU_MOREX_r3_2HG0198370
HORVU_MOREX_r3_7HG0680120
HORVU_MOREX_r3_5HG0523850
HORVU_MOREX_r3_2HG0192270
HORVU_MOREX_r3_7HG0742860
HORVU_MOREX_r3_1HG0084390
HORVU_MOREX_r3_3HG0290310
HORVU_MOREX_r3_3HG0226380
HORVU_MOREX_r3_3HG0278170
HORVU_MOREX_r3_2HG0183990
HORVU_MOREX_r3_5HG0501020
HORVU_MOREX_r3_6HG0598470
HORVU_MOREX_r3_4HG0413970
HORVU_MOREX_r3_3HG0259560
HORVU_MOREX_r3_4HG0405130
HORVU_MOREX_r3_6HG0553110
HORVU_MOREX_r3_2HG0207790
HORVU_MOREX_r3_4HG0350710
HORVU_MOREX_r3_1HG0071010
HORVU_MOREX_r3_7HG0748530
HORVU_MOREX_r3_1HG0022860
HORVU_MOREX_r3_2HG0099360
HORVU_MOREX_r3_3HG0270870
HORVU_MOREX_r3_2HG0127500
HORVU_MOREX_r3_3HG0242050
HORVU_MOREX_r3_3HG0239660
HORVU_MOREX_r3_4HG0409510
HORVU_MOREX_r3_7HG0746260
HORVU_MOREX_r3_7HG0705500
novel.4752
HORVU_MOREX_r3_3HG0312240
HORVU_MOREX_r3_5HG0458300
HORVU_MOREX_r3_5HG0514010
HORVU_MOREX_r3_5HG0495360
HORVU_MOREX_r3_5HG0478610
HORVU_MOREX_r3_5HG0440170
HORVU_MOREX_r3_4HG0393050
HORVU_MOREX_r3_6HG0605740
HORVU_MOREX_r3_7HG0659990
HORVU_MOREX_r3_3HG0260210
HORVU_MOREX_r3_1HG0073570
HORVU_MOREX_r3_4HG0351790
novel.4797
HORVU_MOREX_r3_5HG0509270
HORVU_MOREX_r3_7HG0717480
HORVU_MOREX_r3_5HG0463010
HORVU_MOREX_r3_5HG0500040
HORVU_MOREX_r3_4HG0415770
HORVU_MOREX_r3_7HG0667780
HORVU_MOREX_r3_2HG0198470
HORVU_MOREX_r3_3HG0312780
HORVU_MOREX_r3_5HG0444220
HORVU_MOREX_r3_2HG0182730
HORVU_MOREX_r3_2HG0174410
HORVU_MOREX_r3_1HG0034590
HORVU_MOREX_r3_2HG0197560
HORVU_MOREX_r3_6HG0583670
HORVU_MOREX_r3_5HG0528610
HORVU_MOREX_r3_3HG0282020
HORVU_MOREX_r3_4HG0331850
HORVU_MOREX_r3_1HG0058310
HORVU_MOREX_r3_4HG0394990
HORVU_MOREX_r3_3HG0289490
HORVU_MOREX_r3_7HG0735560
HORVU_MOREX_r3_7HG0721890
HORVU_MOREX_r3_4HG0412090
HORVU_MOREX_r3_3HG0331080
HORVU_MOREX_r3_4HG0403960
HORVU_MOREX_r3_3HG0261020
HORVU_MOREX_r3_2HG0191110
HORVU_MOREX_r3_2HG0169700
HORVU_MOREX_r3_7HG0701150
HORVU_MOREX_r3_7HG0712580
HORVU_MOREX_r3_3HG0241000
HORVU_MOREX_r3_2HG0176490
HORVU_MOREX_r3_3HG0252620
HORVU_MOREX_r3_3HG0220250
HORVU_MOREX_r3_3HG0273390
HORVU_MOREX_r3_7HG0680850
HORVU_MOREX_r3_4HG0381790
HORVU_MOREX_r3_2HG0185210
HORVU_MOREX_r3_7HG0669480
HORVU_MOREX_r3_5HG0510250
HORVU_MOREX_r3_7HG0642300
HORVU_MOREX_r3_5HG0476460
HORVU_MOREX_r3_7HG0660290
HORVU_MOREX_r3_2HG0141980
HORVU_MOREX_r3_5HG0517230
HORVU_MOREX_r3_7HG0735210
HORVU_MOREX_r3_5HG0518000
HORVU_MOREX_r3_7HG0665640
HORVU_MOREX_r3_3HG0330820
HORVU_MOREX_r3_4HG0396760
HORVU_MOREX_r3_7HG0736800
HORVU_MOREX_r3_7HG0647930
HORVU_MOREX_r3_3HG0299310
HORVU_MOREX_r3_3HG0293400
HORVU_MOREX_r3_4HG0409490
HORVU_MOREX_r3_6HG0554540
HORVU_MOREX_r3_3HG0248300
novel.1238
HORVU_MOREX_r3_6HG0545380
HORVU_MOREX_r3_4HG0416300
HORVU_MOREX_r3_7HG0676380
HORVU_MOREX_r3_3HG0276050
HORVU_MOREX_r3_2HG0104620
HORVU_MOREX_r3_5HG0492640
HORVU_MOREX_r3_5HG0427650
HORVU_MOREX_r3_5HG0428440
HORVU_MOREX_r3_5HG0513610
HORVU_MOREX_r3_3HG0284780
HORVU_MOREX_r3_7HG0709620
HORVU_MOREX_r3_2HG0118490
HORVU_MOREX_r3_6HG0604850
HORVU_MOREX_r3_3HG0225400
HORVU_MOREX_r3_6HG0541040
HORVU_MOREX_r3_2HG0098980
HORVU_MOREX_r3_4HG0383650
HORVU_MOREX_r3_5HG0463550
HORVU_MOREX_r3_3HG0219640
HORVU_MOREX_r3_7HG0653970
HORVU_MOREX_r3_2HG0215660
HORVU_MOREX_r3_5HG0473870
HORVU_MOREX_r3_2HG0104260
HORVU_MOREX_r3_2HG0156710
HORVU_MOREX_r3_5HG0448420
HORVU_MOREX_r3_3HG0281780
HORVU_MOREX_r3_5HG0424470
HORVU_MOREX_r3_5HG0478650
novel.2083
novel.838
HORVU_MOREX_r3_7HG0729520
HORVU_MOREX_r3_2HG0156720
HORVU_MOREX_r3_6HG0613450
novel.5068
HORVU_MOREX_r3_6HG0552120
HORVU_MOREX_r3_1HG0020450
HORVU_MOREX_r3_3HG0302500
HORVU_MOREX_r3_5HG0489000
HORVU_MOREX_r3_2HG0136340
HORVU_MOREX_r3_2HG0102650
HORVU_MOREX_r3_2HG0099570
HORVU_MOREX_r3_6HG0565990
novel.7367
HORVU_MOREX_r3_5HG0499140
HORVU_MOREX_r3_3HG0322360
HORVU_MOREX_r3_7HG0738610
HORVU_MOREX_r3_4HG0410340
HORVU_MOREX_r3_7HG0665680
HORVU_MOREX_r3_2HG0152430
HORVU_MOREX_r3_3HG0251770
HORVU_MOREX_r3_2HG0131830
HORVU_MOREX_r3_4HG0345260
HORVU_MOREX_r3_5HG0479070
HORVU_MOREX_r3_7HG0730110
novel.7365
HORVU_MOREX_r3_2HG0155130
HORVU_MOREX_r3_UnG0753190
novel.3221
HORVU_MOREX_r3_2HG0127420
HORVU_MOREX_r3_5HG0444100
HORVU_MOREX_r3_7HG0728610
HORVU_MOREX_r3_5HG0479820
HORVU_MOREX_r3_2HG0211990
novel.4643
HORVU_MOREX_r3_1HG0022490
HORVU_MOREX_r3_6HG0630920
HORVU_MOREX_r3_3HG0225370
HORVU_MOREX_r3_5HG0439080
HORVU_MOREX_r3_6HG0558550
HORVU_MOREX_r3_2HG0191330
HORVU_MOREX_r3_2HG0169630
HORVU_MOREX_r3_7HG0657440
HORVU_MOREX_r3_3HG0226480
HORVU_MOREX_r3_6HG0560520
HORVU_MOREX_r3_6HG0627720
HORVU_MOREX_r3_3HG0306030
HORVU_MOREX_r3_4HG0346930
HORVU_MOREX_r3_7HG0683040
novel.4200
HORVU_MOREX_r3_3HG0231520
novel.1634
HORVU_MOREX_r3_2HG0185390
HORVU_MOREX_r3_7HG0648120
HORVU_MOREX_r3_5HG0517940
HORVU_MOREX_r3_1HG0086430
HORVU_MOREX_r3_2HG0156610
novel.3503
HORVU_MOREX_r3_3HG0245080
HORVU_MOREX_r3_3HG0226120
HORVU_MOREX_r3_3HG0224910
novel.5168
HORVU_MOREX_r3_5HG0511590
novel.488
HORVU_MOREX_r3_5HG0481830
HORVU_MOREX_r3_6HG0627340
novel.970
HORVU_MOREX_r3_7HG0731600
HORVU_MOREX_r3_5HG0481130
HORVU_MOREX_r3_5HG0499620
HORVU_MOREX_r3_4HG0408430
HORVU_MOREX_r3_6HG0551300
novel.6314
novel.3358
HORVU_MOREX_r3_1HG0056660
HORVU_MOREX_r3_2HG0177990
HORVU_MOREX_r3_2HG0178030
HORVU_MOREX_r3_7HG0736840
HORVU_MOREX_r3_3HG0224400
HORVU_MOREX_r3_3HG0275450
HORVU_MOREX_r3_2HG0111920
HORVU_MOREX_r3_4HG0410030
HORVU_MOREX_r3_2HG0201030
HORVU_MOREX_r3_6HG0548000
HORVU_MOREX_r3_3HG0285710
HORVU_MOREX_r3_7HG0657500
HORVU_MOREX_r3_3HG0241870
HORVU_MOREX_r3_5HG0494200
HORVU_MOREX_r3_1HG0021800
HORVU_MOREX_r3_3HG0296120
HORVU_MOREX_r3_7HG0665480
HORVU_MOREX_r3_2HG0198450
HORVU_MOREX_r3_4HG0378680
HORVU_MOREX_r3_7HG0729340
HORVU_MOREX_r3_3HG0226070
novel.6710
novel.7138
HORVU_MOREX_r3_1HG0049130
HORVU_MOREX_r3_2HG0170860
HORVU_MOREX_r3_5HG0506020
HORVU_MOREX_r3_1HG0010600
HORVU_MOREX_r3_6HG0602090
HORVU_MOREX_r3_7HG0643120
novel.407
HORVU_MOREX_r3_2HG0199720
HORVU_MOREX_r3_2HG0204280
HORVU_MOREX_r3_2HG0127250
HORVU_MOREX_r3_6HG0542370
novel.991
HORVU_MOREX_r3_UnG0795730
HORVU_MOREX_r3_3HG0314560
HORVU_MOREX_r3_5HG0428890
HORVU_MOREX_r3_2HG0174500
HORVU_MOREX_r3_6HG0606890
HORVU_MOREX_r3_6HG0595330
HORVU_MOREX_r3_6HG0542390
HORVU_MOREX_r3_2HG0178090
HORVU_MOREX_r3_2HG0217520
HORVU_MOREX_r3_1HG0088480
novel.1729
HORVU_MOREX_r3_6HG0552180
HORVU_MOREX_r3_4HG0414930
HORVU_MOREX_r3_3HG0236050
HORVU_MOREX_r3_5HG0438060
HORVU_MOREX_r3_6HG0539830
HORVU_MOREX_r3_7HG0668240
HORVU_MOREX_r3_1HG0000250
HORVU_MOREX_r3_6HG0629480
HORVU_MOREX_r3_4HG0418520
HORVU_MOREX_r3_2HG0095550
HORVU_MOREX_r3_3HG0322340
novel.5167
novel.2036
HORVU_MOREX_r3_4HG0404910
HORVU_MOREX_r3_7HG0658720
HORVU_MOREX_r3_2HG0118450
HORVU_MOREX_r3_5HG0433150
HORVU_MOREX_r3_2HG0204970
HORVU_MOREX_r3_3HG0237510
novel.7290
novel.6683
HORVU_MOREX_r3_3HG0299890
novel.1993
HORVU_MOREX_r3_5HG0521600
HORVU_MOREX_r3_5HG0444940
novel.1504
HORVU_MOREX_r3_4HG0339970
HORVU_MOREX_r3_3HG0230520
HORVU_MOREX_r3_7HG0643110
novel.2289
HORVU_MOREX_r3_4HG0395620
HORVU_MOREX_r3_3HG0236430
HORVU_MOREX_r3_7HG0715480
HORVU_MOREX_r3_7HG0706810
HORVU_MOREX_r3_3HG0229310
HORVU_MOREX_r3_3HG0303060
HORVU_MOREX_r3_2HG0168830
HORVU_MOREX_r3_1HG0078100
HORVU_MOREX_r3_1HG0063870
HORVU_MOREX_r3_2HG0208200
HORVU_MOREX_r3_7HG0675780
novel.3654
novel.3713
HORVU_MOREX_r3_1HG0060360
HORVU_MOREX_r3_6HG0593900
novel.2414
HORVU_MOREX_r3_2HG0189400
novel.7366
HORVU_MOREX_r3_2HG0131770
HORVU_MOREX_r3_3HG0313580
HORVU_MOREX_r3_7HG0673150
HORVU_MOREX_r3_1HG0091260
novel.6306
HORVU_MOREX_r3_7HG0668550
novel.4717
HORVU_MOREX_r3_3HG0301720
HORVU_MOREX_r3_1HG0018170
novel.6776
novel.5786
novel.3354
novel.3481
novel.1023
HORVU_MOREX_r3_7HG0715810
HORVU_MOREX_r3_1HG0074840
novel.298
HORVU_MOREX_r3_2HG0122070
HORVU_MOREX_r3_2HG0213610
HORVU_MOREX_r3_3HG0220750
HORVU_MOREX_r3_3HG0225180
HORVU_MOREX_r3_2HG0175130
novel.6041
novel.2181
HORVU_MOREX_r3_4HG0338560
novel.1537
HORVU_MOREX_r3_2HG0101600
HORVU_MOREX_r3_2HG0199880
HORVU_MOREX_r3_3HG0247440
HORVU_MOREX_r3_7HG0729700
HORVU_MOREX_r3_2HG0111890
novel.5165
novel.6819
novel.433
novel.897
novel.1776
novel.1637
novel.3652
HORVU_MOREX_r3_2HG0128100
HORVU_MOREX_r3_3HG0329560
novel.1628
HORVU_MOREX_r3_1HG0085440
HORVU_MOREX_r3_3HG0225420
novel.1894
HORVU_MOREX_r3_7HG0748640
HORVU_MOREX_r3_4HG0341100
novel.1661
HORVU_MOREX_r3_5HG0493990
HORVU_MOREX_r3_1HG0009490
HORVU_MOREX_r3_1HG0008380
novel.2179
HORVU_MOREX_r3_6HG0623120
novel.467
novel.1211
HORVU_MOREX_r3_1HG0093840
HORVU_MOREX_r3_6HG0622800
HORVU_MOREX_r3_4HG0415610
novel.1728
HORVU_MOREX_r3_2HG0214150
novel.5170
HORVU_MOREX_r3_6HG0558260
novel.7378
novel.4799
HORVU_MOREX_r3_6HG0623130
novel.1503
HORVU_MOREX_r3_4HG0350600
HORVU_MOREX_r3_7HG0640800
novel.3470
HORVU_MOREX_r3_2HG0174390
HORVU_MOREX_r3_5HG0505240
HORVU_MOREX_r3_1HG0006210
HORVU_MOREX_r3_3HG0327180
novel.7293
HORVU_MOREX_r3_7HG0636790
HORVU_MOREX_r3_5HG0514660
novel.2922
HORVU_MOREX_r3_4HG0346640
novel.2232
HORVU_MOREX_r3_5HG0503570
novel.5694
HORVU_MOREX_r3_7HG0734200
novel.4525
HORVU_MOREX_r3_5HG0503680
novel.2912
HORVU_MOREX_r3_1HG0062760
HORVU_MOREX_r3_1HG0014220
novel.7569
HORVU_MOREX_r3_6HG0618760
HORVU_MOREX_r3_5HG0480140
HORVU_MOREX_r3_2HG0200000
HORVU_MOREX_r3_7HG0660270
HORVU_MOREX_r3_5HG0464570
novel.5855
HORVU_MOREX_r3_7HG0657380
novel.5398
HORVU_MOREX_r3_1HG0019660
HORVU_MOREX_r3_2HG0131680
HORVU_MOREX_r3_6HG0540050
novel.483
HORVU_MOREX_r3_2HG0202490
novel.7340
HORVU_MOREX_r3_5HG0484640
novel.4100
HORVU_MOREX_r3_6HG0618100
novel.2078
HORVU_MOREX_r3_3HG0222080
novel.7354
HORVU_MOREX_r3_7HG0640110
HORVU_MOREX_r3_2HG0104670
novel.6185
HORVU_MOREX_r3_5HG0495250
novel.2891
novel.5503
novel.1621
novel.5496
HORVU_MOREX_r3_7HG0643080
HORVU_MOREX_r3_1HG0091250
novel.4486
HORVU_MOREX_r3_6HG0617770
novel.1019
HORVU_MOREX_r3_3HG0281320
novel.7401
novel.5713
novel.7454
HORVU_MOREX_r3_2HG0108930
HORVU_MOREX_r3_7HG0727810
HORVU_MOREX_r3_4HG0361490
HORVU_MOREX_r3_3HG0309170
HORVU_MOREX_r3_4HG0332670
novel.2686
HORVU_MOREX_r3_6HG0542460
HORVU_MOREX_r3_6HG0582650
HORVU_MOREX_r3_1HG0073280
HORVU_MOREX_r3_2HG0202830
HORVU_MOREX_r3_1HG0067400
HORVU_MOREX_r3_6HG0627430
novel.7555
HORVU_MOREX_r3_7HG0752030
novel.3002
novel.3327
novel.6559
novel.6136
novel.807
novel.7452
HORVU_MOREX_r3_6HG0597670
HORVU_MOREX_r3_6HG0542550
novel.3707
HORVU_MOREX_r3_3HG0297530
novel.5991
HORVU_MOREX_r3_1HG0077410
HORVU_MOREX_r3_6HG0542560
HORVU_MOREX_r3_7HG0727970
novel.1471
HORVU_MOREX_r3_7HG0656990
HORVU_MOREX_r3_6HG0629470
novel.3775
novel.2363
novel.764
HORVU_MOREX_r3_3HG0226270
novel.2006
HORVU_MOREX_r3_2HG0202820
novel.2313
novel.1408
novel.1332
HORVU_MOREX_r3_1HG0003720
novel.3726
novel.2692

## Sheet: pink_gene_list
HORVU_MOREX_r3_7HG0665050
HORVU_MOREX_r3_4HG0415490
HORVU_MOREX_r3_2HG0116210
HORVU_MOREX_r3_1HG0026070
novel.7314
novel.2051
novel.4756
HORVU_MOREX_r3_5HG0514790
novel.7379
novel.4049
novel.5081
novel.1328
novel.867
HORVU_MOREX_r3_5HG0521940
novel.588
HORVU_MOREX_r3_2HG0205530
novel.3437
HORVU_MOREX_r3_5HG0466770
novel.5006
HORVU_MOREX_r3_2HG0209020
novel.6824
novel.4341
novel.5082
HORVU_MOREX_r3_1HG0024910
novel.5380
novel.4713
novel.5286
novel.6673
novel.4096
novel.6950
novel.2854
novel.3219
novel.1962
novel.6714
novel.3125
novel.5832
novel.7436
novel.6989
novel.3735
novel.7475
novel.1697
novel.107
novel.4194
novel.2641
novel.7059
novel.6240
HORVU_MOREX_r3_4HG0393930
novel.1802
novel.4157
novel.1902
HORVU_MOREX_r3_3HG0246560
HORVU_MOREX_r3_7HG0716730
HORVU_MOREX_r3_4HG0332030
novel.314
HORVU_MOREX_r3_4HG0349380
novel.1987
novel.3133
novel.5815
novel.5274
novel.2094
novel.2777
HORVU_MOREX_r3_1HG0087980
novel.5662
HORVU_MOREX_r3_4HG0378160
novel.5805
novel.5736
novel.211
HORVU_MOREX_r3_7HG0711840
novel.1985
novel.4694
novel.6719
HORVU_MOREX_r3_5HG0510060
novel.849
HORVU_MOREX_r3_2HG0146330
HORVU_MOREX_r3_5HG0468290
HORVU_MOREX_r3_1HG0044310
novel.2913
novel.2679
HORVU_MOREX_r3_2HG0112820
novel.862
HORVU_MOREX_r3_6HG0628850
novel.2586
HORVU_MOREX_r3_3HG0280990
novel.4946
HORVU_MOREX_r3_3HG0228030
novel.389
novel.3829
novel.709
HORVU_MOREX_r3_2HG0194250
novel.430
HORVU_MOREX_r3_6HG0582870
novel.5874
novel.7171
novel.4578
novel.3213
novel.7305
novel.4350
novel.6307
HORVU_MOREX_r3_6HG0582880
novel.7248
novel.5191
novel.2062
novel.6718
novel.6711
novel.1095
novel.356
novel.6443
HORVU_MOREX_r3_7HG0689220
HORVU_MOREX_r3_4HG0417900
novel.4741
HORVU_MOREX_r3_2HG0139590
novel.3335
novel.7164
novel.1384
novel.2102
novel.3532
HORVU_MOREX_r3_1HG0084340
novel.654
HORVU_MOREX_r3_5HG0529130
novel.1179
novel.2995
novel.5181
novel.1694
novel.648
novel.7068
novel.7283
novel.357
HORVU_MOREX_r3_6HG0560910
HORVU_MOREX_r3_2HG0198710
novel.4823
HORVU_MOREX_r3_5HG0494320
novel.4636
novel.7149
novel.5695
HORVU_MOREX_r3_1HG0059770
novel.3341
HORVU_MOREX_r3_2HG0118560
HORVU_MOREX_r3_5HG0455100
HORVU_MOREX_r3_3HG0310110
HORVU_MOREX_r3_5HG0517050
novel.288
HORVU_MOREX_r3_6HG0610140
HORVU_MOREX_r3_2HG0167300
HORVU_MOREX_r3_3HG0250180
HORVU_MOREX_r3_3HG0300700
HORVU_MOREX_r3_5HG0532090
novel.7437
novel.3632
novel.1662
novel.6181
novel.7330
HORVU_MOREX_r3_4HG0336270
novel.3730
HORVU_MOREX_r3_5HG0478250
HORVU_MOREX_r3_1HG0080720
HORVU_MOREX_r3_6HG0591210
HORVU_MOREX_r3_5HG0437610
HORVU_MOREX_r3_4HG0378950
novel.6085
HORVU_MOREX_r3_7HG0704520
HORVU_MOREX_r3_4HG0416550
HORVU_MOREX_r3_6HG0634260
novel.1084
HORVU_MOREX_r3_5HG0426690
novel.2350
HORVU_MOREX_r3_1HG0004660
novel.7335
HORVU_MOREX_r3_5HG0512410
HORVU_MOREX_r3_7HG0651560
novel.4923
HORVU_MOREX_r3_5HG0504790
HORVU_MOREX_r3_7HG0701140
HORVU_MOREX_r3_6HG0595020
HORVU_MOREX_r3_5HG0471140
novel.1753
novel.7132
HORVU_MOREX_r3_7HG0737960
novel.5275
HORVU_MOREX_r3_7HG0740420
HORVU_MOREX_r3_2HG0119860
novel.171
HORVU_MOREX_r3_5HG0448530
HORVU_MOREX_r3_7HG0654500
novel.7319
HORVU_MOREX_r3_1HG0094000
HORVU_MOREX_r3_1HG0087990
HORVU_MOREX_r3_2HG0100860
HORVU_MOREX_r3_5HG0471790
HORVU_MOREX_r3_6HG0548940
HORVU_MOREX_r3_7HG0704720
HORVU_MOREX_r3_3HG0283670
HORVU_MOREX_r3_3HG0266190
HORVU_MOREX_r3_7HG0677060
HORVU_MOREX_r3_5HG0426340
novel.1103
HORVU_MOREX_r3_5HG0490210
HORVU_MOREX_r3_4HG0378900
HORVU_MOREX_r3_5HG0448610
HORVU_MOREX_r3_3HG0280610
HORVU_MOREX_r3_2HG0184840
HORVU_MOREX_r3_4HG0345330
HORVU_MOREX_r3_6HG0548020
HORVU_MOREX_r3_2HG0207450
HORVU_MOREX_r3_7HG0704400
HORVU_MOREX_r3_2HG0173120
HORVU_MOREX_r3_2HG0178450
HORVU_MOREX_r3_4HG0383590
HORVU_MOREX_r3_6HG0586220
novel.7174
HORVU_MOREX_r3_6HG0578020
HORVU_MOREX_r3_5HG0467970
HORVU_MOREX_r3_6HG0613230
HORVU_MOREX_r3_6HG0548070
HORVU_MOREX_r3_5HG0422600
HORVU_MOREX_r3_2HG0142490
HORVU_MOREX_r3_1HG0011170
HORVU_MOREX_r3_1HG0091010
HORVU_MOREX_r3_2HG0217620
HORVU_MOREX_r3_4HG0336250
HORVU_MOREX_r3_2HG0216930
HORVU_MOREX_r3_3HG0308560
novel.7173
HORVU_MOREX_r3_7HG0708900
HORVU_MOREX_r3_7HG0721220
HORVU_MOREX_r3_3HG0297570
HORVU_MOREX_r3_6HG0592930
novel.4132
HORVU_MOREX_r3_4HG0357310
HORVU_MOREX_r3_5HG0536560
HORVU_MOREX_r3_2HG0168170
novel.4334
HORVU_MOREX_r3_5HG0460900
HORVU_MOREX_r3_3HG0299280
HORVU_MOREX_r3_5HG0455580
HORVU_MOREX_r3_3HG0261880
HORVU_MOREX_r3_7HG0667410
HORVU_MOREX_r3_7HG0687080
HORVU_MOREX_r3_6HG0631210
HORVU_MOREX_r3_7HG0634950
HORVU_MOREX_r3_5HG0525980
HORVU_MOREX_r3_1HG0089000
HORVU_MOREX_r3_2HG0176800
HORVU_MOREX_r3_5HG0442360
HORVU_MOREX_r3_7HG0713870
HORVU_MOREX_r3_4HG0341810
novel.3731
HORVU_MOREX_r3_1HG0032840
HORVU_MOREX_r3_2HG0198530
HORVU_MOREX_r3_2HG0203060
HORVU_MOREX_r3_6HG0632000
HORVU_MOREX_r3_4HG0407980
HORVU_MOREX_r3_3HG0241230
HORVU_MOREX_r3_1HG0024560
HORVU_MOREX_r3_1HG0066080
HORVU_MOREX_r3_6HG0631660
HORVU_MOREX_r3_1HG0044850
HORVU_MOREX_r3_3HG0263930
HORVU_MOREX_r3_3HG0232990
novel.3142
HORVU_MOREX_r3_7HG0660840
HORVU_MOREX_r3_4HG0356500
HORVU_MOREX_r3_5HG0434210
HORVU_MOREX_r3_2HG0198330
HORVU_MOREX_r3_1HG0034230
HORVU_MOREX_r3_4HG0393110
HORVU_MOREX_r3_5HG0437400
HORVU_MOREX_r3_4HG0341820
HORVU_MOREX_r3_5HG0473480
HORVU_MOREX_r3_4HG0336340
HORVU_MOREX_r3_7HG0686940
HORVU_MOREX_r3_1HG0043000
HORVU_MOREX_r3_1HG0055820
HORVU_MOREX_r3_2HG0180490
HORVU_MOREX_r3_5HG0509180
novel.7123
HORVU_MOREX_r3_4HG0374770
novel.273
HORVU_MOREX_r3_2HG0180010
HORVU_MOREX_r3_7HG0729500
HORVU_MOREX_r3_5HG0419530
HORVU_MOREX_r3_4HG0339800
HORVU_MOREX_r3_1HG0095090
HORVU_MOREX_r3_3HG0301810
HORVU_MOREX_r3_2HG0181660
HORVU_MOREX_r3_2HG0176280
HORVU_MOREX_r3_1HG0031410
HORVU_MOREX_r3_2HG0146580
HORVU_MOREX_r3_5HG0459930
novel.6353
HORVU_MOREX_r3_5HG0491260
HORVU_MOREX_r3_4HG0374570
HORVU_MOREX_r3_3HG0281620
HORVU_MOREX_r3_3HG0272120
HORVU_MOREX_r3_4HG0410760
HORVU_MOREX_r3_1HG0010660
HORVU_MOREX_r3_4HG0389410
novel.6674
novel.6646
novel.3167
HORVU_MOREX_r3_3HG0327900
HORVU_MOREX_r3_6HG0622690
HORVU_MOREX_r3_7HG0752010
HORVU_MOREX_r3_4HG0375930
HORVU_MOREX_r3_1HG0077840
HORVU_MOREX_r3_2HG0209340
HORVU_MOREX_r3_3HG0316280
HORVU_MOREX_r3_3HG0287730
HORVU_MOREX_r3_4HG0381360
HORVU_MOREX_r3_1HG0053940
HORVU_MOREX_r3_3HG0329930
novel.5791
novel.6267
novel.4236
novel.3817
HORVU_MOREX_r3_1HG0004110
HORVU_MOREX_r3_4HG0399210
HORVU_MOREX_r3_1HG0064490
HORVU_MOREX_r3_1HG0073130
novel.1421
HORVU_MOREX_r3_7HG0678940
HORVU_MOREX_r3_1HG0065520
HORVU_MOREX_r3_2HG0115310
HORVU_MOREX_r3_2HG0202360
HORVU_MOREX_r3_1HG0077680
HORVU_MOREX_r3_3HG0285100
HORVU_MOREX_r3_3HG0297560
HORVU_MOREX_r3_7HG0745050
HORVU_MOREX_r3_2HG0148840
HORVU_MOREX_r3_7HG0682420
HORVU_MOREX_r3_5HG0524280
novel.2377
HORVU_MOREX_r3_3HG0253650
HORVU_MOREX_r3_4HG0383800
HORVU_MOREX_r3_4HG0356720
HORVU_MOREX_r3_5HG0522140
HORVU_MOREX_r3_1HG0088690
novel.4190
HORVU_MOREX_r3_5HG0496210
novel.7000
HORVU_MOREX_r3_3HG0321640
novel.1625
HORVU_MOREX_r3_3HG0241830
HORVU_MOREX_r3_2HG0195220
HORVU_MOREX_r3_3HG0267510
HORVU_MOREX_r3_2HG0125300
HORVU_MOREX_r3_2HG0149510
HORVU_MOREX_r3_2HG0207780
HORVU_MOREX_r3_5HG0486800
HORVU_MOREX_r3_1HG0045950
novel.2124
HORVU_MOREX_r3_3HG0277200
HORVU_MOREX_r3_5HG0499650
HORVU_MOREX_r3_3HG0290240
HORVU_MOREX_r3_3HG0322690
HORVU_MOREX_r3_4HG0364310
novel.5547
HORVU_MOREX_r3_1HG0028220
HORVU_MOREX_r3_2HG0148170
HORVU_MOREX_r3_3HG0280730
HORVU_MOREX_r3_1HG0054650
HORVU_MOREX_r3_1HG0082810
HORVU_MOREX_r3_2HG0116580
HORVU_MOREX_r3_1HG0049180
HORVU_MOREX_r3_1HG0040220
novel.95
HORVU_MOREX_r3_5HG0495520
HORVU_MOREX_r3_1HG0068480
HORVU_MOREX_r3_7HG0683090
HORVU_MOREX_r3_6HG0618690
HORVU_MOREX_r3_7HG0668210
novel.6172
HORVU_MOREX_r3_6HG0617780
HORVU_MOREX_r3_3HG0251630
HORVU_MOREX_r3_1HG0046770
HORVU_MOREX_r3_2HG0110840
HORVU_MOREX_r3_5HG0494150
HORVU_MOREX_r3_3HG0291190
HORVU_MOREX_r3_2HG0204960
HORVU_MOREX_r3_6HG0625100
HORVU_MOREX_r3_5HG0470890
HORVU_MOREX_r3_5HG0508060
HORVU_MOREX_r3_7HG0687480
HORVU_MOREX_r3_4HG0335510
HORVU_MOREX_r3_7HG0647360
HORVU_MOREX_r3_5HG0466850
novel.236
HORVU_MOREX_r3_1HG0092660
novel.7054
novel.5259
HORVU_MOREX_r3_4HG0340660
HORVU_MOREX_r3_7HG0691910
HORVU_MOREX_r3_6HG0611060
HORVU_MOREX_r3_2HG0154600
HORVU_MOREX_r3_4HG0412600
novel.1907
novel.7013
HORVU_MOREX_r3_5HG0452940
HORVU_MOREX_r3_1HG0055630
HORVU_MOREX_r3_7HG0720830
HORVU_MOREX_r3_1HG0065010
HORVU_MOREX_r3_2HG0190550
HORVU_MOREX_r3_5HG0501160
novel.3943
HORVU_MOREX_r3_5HG0494550
HORVU_MOREX_r3_2HG0159210
novel.7092
HORVU_MOREX_r3_1HG0057630
HORVU_MOREX_r3_2HG0194480
novel.227
HORVU_MOREX_r3_5HG0492650
HORVU_MOREX_r3_5HG0513180
HORVU_MOREX_r3_5HG0532380
novel.7181
HORVU_MOREX_r3_5HG0480460
HORVU_MOREX_r3_2HG0159790
HORVU_MOREX_r3_5HG0479670
HORVU_MOREX_r3_1HG0059710
HORVU_MOREX_r3_3HG0252630
HORVU_MOREX_r3_6HG0573280
HORVU_MOREX_r3_3HG0218760
HORVU_MOREX_r3_5HG0499920
HORVU_MOREX_r3_6HG0630360
HORVU_MOREX_r3_6HG0573760
HORVU_MOREX_r3_4HG0400700
HORVU_MOREX_r3_3HG0246060
HORVU_MOREX_r3_2HG0135760
novel.32
HORVU_MOREX_r3_7HG0636340
novel.7324
HORVU_MOREX_r3_3HG0309220
HORVU_MOREX_r3_3HG0233760
HORVU_MOREX_r3_3HG0278550
HORVU_MOREX_r3_2HG0171300
HORVU_MOREX_r3_7HG0664150
HORVU_MOREX_r3_5HG0505980
novel.2130
HORVU_MOREX_r3_2HG0166860
HORVU_MOREX_r3_3HG0224210
HORVU_MOREX_r3_6HG0594270
HORVU_MOREX_r3_3HG0232890
HORVU_MOREX_r3_2HG0128230
novel.2970
novel.6092
novel.266
HORVU_MOREX_r3_7HG0748740
HORVU_MOREX_r3_3HG0304090
HORVU_MOREX_r3_7HG0636690
HORVU_MOREX_r3_2HG0205290
novel.6205
HORVU_MOREX_r3_4HG0405990
novel.6070
HORVU_MOREX_r3_6HG0627730
novel.1624
HORVU_MOREX_r3_7HG0716430
HORVU_MOREX_r3_3HG0317300
HORVU_MOREX_r3_5HG0531640
novel.2449
HORVU_MOREX_r3_4HG0350680
novel.6908
HORVU_MOREX_r3_1HG0091740
HORVU_MOREX_r3_2HG0200380
novel.3421
novel.1185
HORVU_MOREX_r3_3HG0327700
novel.5238
novel.5940
HORVU_MOREX_r3_1HG0049930
novel.5005
HORVU_MOREX_r3_2HG0096460
HORVU_MOREX_r3_1HG0058800
HORVU_MOREX_r3_4HG0409210
HORVU_MOREX_r3_7HG0745720
HORVU_MOREX_r3_3HG0310080
HORVU_MOREX_r3_2HG0133020
HORVU_MOREX_r3_4HG0331360
novel.64
novel.3145
HORVU_MOREX_r3_6HG0594600
HORVU_MOREX_r3_5HG0478980
HORVU_MOREX_r3_1HG0094280
HORVU_MOREX_r3_2HG0157300
HORVU_MOREX_r3_1HG0084690
HORVU_MOREX_r3_4HG0392110
HORVU_MOREX_r3_6HG0546810
HORVU_MOREX_r3_6HG0617970
novel.4427
HORVU_MOREX_r3_2HG0156270
HORVU_MOREX_r3_1HG0085700
novel.4344
HORVU_MOREX_r3_4HG0411870
HORVU_MOREX_r3_4HG0344640
novel.2163
HORVU_MOREX_r3_3HG0228230
HORVU_MOREX_r3_3HG0281070
novel.1312
HORVU_MOREX_r3_1HG0055610
HORVU_MOREX_r3_2HG0153630
HORVU_MOREX_r3_6HG0602530
HORVU_MOREX_r3_2HG0143770
novel.1380
HORVU_MOREX_r3_3HG0316640
HORVU_MOREX_r3_3HG0225850
HORVU_MOREX_r3_3HG0300820
HORVU_MOREX_r3_3HG0288420
HORVU_MOREX_r3_6HG0604200
HORVU_MOREX_r3_3HG0246910
HORVU_MOREX_r3_6HG0601670
novel.872
HORVU_MOREX_r3_5HG0440760
HORVU_MOREX_r3_5HG0428290
novel.1172
HORVU_MOREX_r3_1HG0074960
HORVU_MOREX_r3_7HG0729020
HORVU_MOREX_r3_3HG0282500
HORVU_MOREX_r3_2HG0208840
HORVU_MOREX_r3_1HG0081260
HORVU_MOREX_r3_7HG0656530
HORVU_MOREX_r3_3HG0314270
novel.5505
HORVU_MOREX_r3_4HG0335590
HORVU_MOREX_r3_3HG0234730
HORVU_MOREX_r3_7HG0676020
HORVU_MOREX_r3_2HG0141900
HORVU_MOREX_r3_7HG0663140
novel.6262
novel.5283
HORVU_MOREX_r3_7HG0741610
novel.614
HORVU_MOREX_r3_3HG0325320
HORVU_MOREX_r3_5HG0520210
novel.5129
HORVU_MOREX_r3_2HG0193180
novel.5659
HORVU_MOREX_r3_1HG0053700
HORVU_MOREX_r3_5HG0529380
HORVU_MOREX_r3_1HG0041500
HORVU_MOREX_r3_5HG0471800
HORVU_MOREX_r3_6HG0565670
HORVU_MOREX_r3_2HG0123280
novel.988
HORVU_MOREX_r3_3HG0297170
novel.4036
novel.154
HORVU_MOREX_r3_1HG0068450
novel.2667
HORVU_MOREX_r3_5HG0493400
HORVU_MOREX_r3_5HG0427210
HORVU_MOREX_r3_1HG0078020
HORVU_MOREX_r3_3HG0290340
novel.7077
HORVU_MOREX_r3_5HG0502470
HORVU_MOREX_r3_2HG0121530
novel.1386
HORVU_MOREX_r3_4HG0333010
novel.5033
HORVU_MOREX_r3_5HG0487590
novel.537
HORVU_MOREX_r3_5HG0502100
HORVU_MOREX_r3_1HG0061480
HORVU_MOREX_r3_7HG0662620
novel.4295
HORVU_MOREX_r3_1HG0061080
novel.5198
HORVU_MOREX_r3_2HG0180530
HORVU_MOREX_r3_1HG0069660
HORVU_MOREX_r3_5HG0515880
HORVU_MOREX_r3_2HG0157320
novel.7033
HORVU_MOREX_r3_5HG0510640
novel.3989
HORVU_MOREX_r3_2HG0113960
HORVU_MOREX_r3_3HG0287070
novel.2755
HORVU_MOREX_r3_5HG0511500
HORVU_MOREX_r3_2HG0097700
HORVU_MOREX_r3_7HG0636130
HORVU_MOREX_r3_2HG0198730
novel.4620
novel.2553
HORVU_MOREX_r3_6HG0595430
HORVU_MOREX_r3_2HG0185550
novel.3846
novel.562
novel.2540
novel.5372
HORVU_MOREX_r3_4HG0413720
novel.5573
novel.5173
HORVU_MOREX_r3_4HG0390860
HORVU_MOREX_r3_3HG0225320
HORVU_MOREX_r3_7HG0666570
novel.4141
HORVU_MOREX_r3_7HG0667760
HORVU_MOREX_r3_2HG0166000
novel.5886
novel.3734
novel.3550
novel.434
HORVU_MOREX_r3_1HG0051060
HORVU_MOREX_r3_1HG0077510
HORVU_MOREX_r3_4HG0366420
HORVU_MOREX_r3_2HG0104630
HORVU_MOREX_r3_4HG0400260
HORVU_MOREX_r3_6HG0619590
novel.893
HORVU_MOREX_r3_5HG0534370
HORVU_MOREX_r3_3HG0232030
novel.1535
novel.7027
HORVU_MOREX_r3_7HG0644190
novel.6746
novel.5300
HORVU_MOREX_r3_5HG0457350
HORVU_MOREX_r3_7HG0747520
HORVU_MOREX_r3_7HG0671070
novel.170
novel.5052
novel.661
HORVU_MOREX_r3_3HG0226510
novel.6651
novel.634
HORVU_MOREX_r3_1HG0078500
HORVU_MOREX_r3_3HG0313250
novel.2121
novel.3083
HORVU_MOREX_r3_4HG0340360
novel.6441
HORVU_MOREX_r3_1HG0086450
HORVU_MOREX_r3_UnG0760970
HORVU_MOREX_r3_4HG0418110
novel.1721
HORVU_MOREX_r3_UnG0769130
novel.6123
novel.2926
HORVU_MOREX_r3_1HG0092980
novel.6581
novel.1481
novel.7028
HORVU_MOREX_r3_6HG0600090
HORVU_MOREX_r3_1HG0079200
novel.5902
novel.244
HORVU_MOREX_r3_4HG0337010
HORVU_MOREX_r3_7HG0743630
novel.7336
novel.3843
HORVU_MOREX_r3_1HG0065880
novel.303
novel.1531
novel.1930
novel.6264
novel.1264
novel.1122
novel.3666
HORVU_MOREX_r3_4HG0403380
HORVU_MOREX_r3_5HG0431140
HORVU_MOREX_r3_7HG0741750
HORVU_MOREX_r3_2HG0213510
novel.7285
novel.6346
HORVU_MOREX_r3_3HG0306630
novel.5098
HORVU_MOREX_r3_7HG0752890
HORVU_MOREX_r3_1HG0071930
HORVU_MOREX_r3_7HG0715930
HORVU_MOREX_r3_6HG0610700
novel.3460
HORVU_MOREX_r3_1HG0056540
HORVU_MOREX_r3_6HG0543380
novel.1540
novel.7527
HORVU_MOREX_r3_1HG0049000
novel.6177
HORVU_MOREX_r3_3HG0250860
novel.1936
novel.4059
HORVU_MOREX_r3_4HG0334550
novel.6946
novel.405
HORVU_MOREX_r3_4HG0410290
novel.517
novel.3870
HORVU_MOREX_r3_7HG0642940
novel.4389
novel.1696
novel.7369
novel.7205
novel.2152
novel.2358
novel.749
HORVU_MOREX_r3_5HG0502340
novel.4201
novel.3418
novel.6803
HORVU_MOREX_r3_3HG0329980
HORVU_MOREX_r3_3HG0226470
novel.5953
novel.5912
novel.7161
novel.5235
novel.1554
HORVU_MOREX_r3_5HG0465860
HORVU_MOREX_r3_7HG0662090
novel.4986
novel.4093
novel.6063
novel.4444
novel.156
HORVU_MOREX_r3_4HG0363040
HORVU_MOREX_r3_5HG0497070
novel.4530
novel.5236
novel.2286
novel.1924
novel.6659
HORVU_MOREX_r3_2HG0128860
HORVU_MOREX_r3_7HG0705060
novel.3408
HORVU_MOREX_r3_UnG0761010
HORVU_MOREX_r3_4HG0388480
novel.1913
novel.2658
novel.3837
novel.2146
novel.6208
novel.5983
novel.6660
novel.6676
novel.4892
HORVU_MOREX_r3_2HG0130340
HORVU_MOREX_r3_6HG0555060
HORVU_MOREX_r3_2HG0188710
novel.2221
HORVU_MOREX_r3_4HG0333500
novel.1343
novel.7390
novel.4638
novel.4255
HORVU_MOREX_r3_1HG0031260
HORVU_MOREX_r3_3HG0295050
HORVU_MOREX_r3_7HG0709090
novel.2419
HORVU_MOREX_r3_5HG0451550
HORVU_MOREX_r3_7HG0665870
novel.2265
HORVU_MOREX_r3_7HG0647460
novel.2470
novel.5195
HORVU_MOREX_r3_2HG0118670
HORVU_MOREX_r3_4HG0338960
HORVU_MOREX_r3_2HG0128000
novel.2090
novel.3031
novel.2172
novel.5969
HORVU_MOREX_r3_4HG0411680
novel.3229
novel.6022
HORVU_MOREX_r3_2HG0214180
novel.2504
novel.5528
novel.6541
novel.3855
HORVU_MOREX_r3_7HG0655550
HORVU_MOREX_r3_4HG0331440
HORVU_MOREX_r3_6HG0540400
novel.5024
novel.2823
novel.1227
HORVU_MOREX_r3_5HG0450400
novel.2359
HORVU_MOREX_r3_6HG0620800
novel.7480
novel.6173
novel.5094
novel.2013
novel.3612
novel.409
HORVU_MOREX_r3_6HG0571450
novel.2391
HORVU_MOREX_r3_7HG0707290
novel.6502
novel.7150
HORVU_MOREX_r3_7HG0656330
novel.7131
HORVU_MOREX_r3_1HG0084490
HORVU_MOREX_r3_3HG0302800
HORVU_MOREX_r3_7HG0674250
novel.2659
novel.1544
HORVU_MOREX_r3_2HG0216340
HORVU_MOREX_r3_4HG0399350
novel.2364
novel.6120
HORVU_MOREX_r3_6HG0607000
novel.4566
HORVU_MOREX_r3_7HG0720460
novel.928
HORVU_MOREX_r3_4HG0335460
HORVU_MOREX_r3_7HG0727260
HORVU_MOREX_r3_1HG0083470
novel.250
HORVU_MOREX_r3_2HG0184580
HORVU_MOREX_r3_7HG0704310
HORVU_MOREX_r3_7HG0699240
HORVU_MOREX_r3_7HG0722420
HORVU_MOREX_r3_5HG0463650
HORVU_MOREX_r3_5HG0462210
novel.5155
HORVU_MOREX_r3_7HG0663700
HORVU_MOREX_r3_6HG0629680
HORVU_MOREX_r3_5HG0481100
HORVU_MOREX_r3_1HG0007340
novel.6301
novel.6380
HORVU_MOREX_r3_5HG0515750
novel.6911
HORVU_MOREX_r3_3HG0235350
novel.5494
novel.4848
HORVU_MOREX_r3_3HG0313450
novel.4853
HORVU_MOREX_r3_4HG0354500
novel.3868
HORVU_MOREX_r3_3HG0326030
novel.2294
novel.1472
HORVU_MOREX_r3_4HG0405390
novel.7511
HORVU_MOREX_r3_2HG0207220
HORVU_MOREX_r3_7HG0641910
novel.4650
novel.6351
novel.4682
HORVU_MOREX_r3_6HG0565660
HORVU_MOREX_r3_7HG0684710
HORVU_MOREX_r3_3HG0301950
novel.7203
novel.1601
HORVU_MOREX_r3_4HG0355020
HORVU_MOREX_r3_6HG0624190
HORVU_MOREX_r3_7HG0712670

## Sheet: maroon_gene_list
HORVU_MOREX_r3_2HG0107850
HORVU_MOREX_r3_1HG0062810
HORVU_MOREX_r3_2HG0125550
HORVU_MOREX_r3_3HG0283090
novel.4609
novel.5268
HORVU_MOREX_r3_7HG0697550
HORVU_MOREX_r3_7HG0693350
HORVU_MOREX_r3_4HG0344470
novel.5289
HORVU_MOREX_r3_1HG0081060
HORVU_MOREX_r3_5HG0439020
novel.1051
HORVU_MOREX_r3_2HG0191450
HORVU_MOREX_r3_1HG0006340
HORVU_MOREX_r3_7HG0661600
HORVU_MOREX_r3_7HG0644220
novel.4240
HORVU_MOREX_r3_1HG0047580
HORVU_MOREX_r3_5HG0441730
HORVU_MOREX_r3_5HG0496610
HORVU_MOREX_r3_4HG0396030
HORVU_MOREX_r3_2HG0123800
HORVU_MOREX_r3_2HG0174140
HORVU_MOREX_r3_6HG0592610
HORVU_MOREX_r3_3HG0245010
HORVU_MOREX_r3_2HG0140980
HORVU_MOREX_r3_2HG0160800
HORVU_MOREX_r3_2HG0186310
HORVU_MOREX_r3_6HG0553820
novel.3069
HORVU_MOREX_r3_3HG0298480
HORVU_MOREX_r3_3HG0268200
HORVU_MOREX_r3_6HG0632660
HORVU_MOREX_r3_7HG0705960
HORVU_MOREX_r3_1HG0083170
HORVU_MOREX_r3_7HG0719560
HORVU_MOREX_r3_3HG0287760
HORVU_MOREX_r3_1HG0034330
HORVU_MOREX_r3_1HG0059920
HORVU_MOREX_r3_6HG0604730
HORVU_MOREX_r3_4HG0414480
HORVU_MOREX_r3_2HG0143220
HORVU_MOREX_r3_7HG0659030
HORVU_MOREX_r3_6HG0554700
HORVU_MOREX_r3_2HG0176290
HORVU_MOREX_r3_4HG0385730
HORVU_MOREX_r3_6HG0580090
HORVU_MOREX_r3_2HG0165160
HORVU_MOREX_r3_4HG0338180
HORVU_MOREX_r3_4HG0365400
HORVU_MOREX_r3_4HG0368300
HORVU_MOREX_r3_2HG0138430
HORVU_MOREX_r3_7HG0743300
HORVU_MOREX_r3_5HG0469250
HORVU_MOREX_r3_5HG0473540
HORVU_MOREX_r3_1HG0055400
HORVU_MOREX_r3_1HG0050200
HORVU_MOREX_r3_7HG0749640
HORVU_MOREX_r3_2HG0176810
HORVU_MOREX_r3_2HG0168580
HORVU_MOREX_r3_6HG0550260
HORVU_MOREX_r3_6HG0553120
HORVU_MOREX_r3_5HG0466830
HORVU_MOREX_r3_3HG0232860
HORVU_MOREX_r3_3HG0249150
HORVU_MOREX_r3_1HG0092210
HORVU_MOREX_r3_7HG0645480
HORVU_MOREX_r3_1HG0055460
HORVU_MOREX_r3_1HG0062640
HORVU_MOREX_r3_4HG0349530
HORVU_MOREX_r3_7HG0660730
HORVU_MOREX_r3_6HG0610970
HORVU_MOREX_r3_5HG0497160
HORVU_MOREX_r3_3HG0240710
HORVU_MOREX_r3_3HG0291750
novel.5925
novel.1119
HORVU_MOREX_r3_2HG0183810
HORVU_MOREX_r3_4HG0384510
HORVU_MOREX_r3_6HG0557410
HORVU_MOREX_r3_4HG0394110
HORVU_MOREX_r3_7HG0730710
HORVU_MOREX_r3_5HG0525010
HORVU_MOREX_r3_6HG0546160
HORVU_MOREX_r3_4HG0393010
HORVU_MOREX_r3_6HG0593200
HORVU_MOREX_r3_3HG0302680
HORVU_MOREX_r3_7HG0655340
HORVU_MOREX_r3_4HG0403370
HORVU_MOREX_r3_4HG0333450
novel.2390
novel.4471
novel.6090
HORVU_MOREX_r3_5HG0502050
novel.3859
HORVU_MOREX_r3_6HG0558410
HORVU_MOREX_r3_1HG0073790
HORVU_MOREX_r3_4HG0338760
novel.5987
novel.145
HORVU_MOREX_r3_5HG0507500
HORVU_MOREX_r3_6HG0572440
HORVU_MOREX_r3_2HG0186060
HORVU_MOREX_r3_7HG0678020
novel.4702
HORVU_MOREX_r3_2HG0185330
HORVU_MOREX_r3_2HG0196050
HORVU_MOREX_r3_5HG0526110
novel.6303
HORVU_MOREX_r3_3HG0287270
HORVU_MOREX_r3_7HG0730970
novel.1443
HORVU_MOREX_r3_3HG0222450
HORVU_MOREX_r3_1HG0083690
HORVU_MOREX_r3_7HG0741090
HORVU_MOREX_r3_5HG0533440
novel.6788
HORVU_MOREX_r3_1HG0038790
HORVU_MOREX_r3_7HG0678440
HORVU_MOREX_r3_7HG0669280
HORVU_MOREX_r3_7HG0729180
novel.3692
novel.659
HORVU_MOREX_r3_5HG0495220

## Sheet: coral1_gene_list
HORVU_MOREX_r3_4HG0335650
novel.1619
novel.6975
HORVU_MOREX_r3_5HG0494010
HORVU_MOREX_r3_6HG0630640
HORVU_MOREX_r3_2HG0113700
HORVU_MOREX_r3_6HG0620980
HORVU_MOREX_r3_4HG0408100
HORVU_MOREX_r3_4HG0332180
HORVU_MOREX_r3_2HG0213040
HORVU_MOREX_r3_7HG0667330
novel.1833
HORVU_MOREX_r3_3HG0311510
HORVU_MOREX_r3_7HG0715120
HORVU_MOREX_r3_5HG0450920
novel.6671
HORVU_MOREX_r3_3HG0284120
HORVU_MOREX_r3_7HG0703260
HORVU_MOREX_r3_2HG0180450
novel.6822
HORVU_MOREX_r3_1HG0007220
HORVU_MOREX_r3_6HG0543110
HORVU_MOREX_r3_7HG0672620
novel.797
HORVU_MOREX_r3_7HG0669610
HORVU_MOREX_r3_3HG0274610
HORVU_MOREX_r3_2HG0202060
HORVU_MOREX_r3_2HG0167660
HORVU_MOREX_r3_5HG0453820
HORVU_MOREX_r3_7HG0669660
HORVU_MOREX_r3_7HG0741190
HORVU_MOREX_r3_3HG0236690
HORVU_MOREX_r3_7HG0695240
HORVU_MOREX_r3_7HG0719340
HORVU_MOREX_r3_6HG0630010
HORVU_MOREX_r3_1HG0007840
HORVU_MOREX_r3_2HG0116700
HORVU_MOREX_r3_4HG0365970
HORVU_MOREX_r3_5HG0424710
HORVU_MOREX_r3_1HG0018620
HORVU_MOREX_r3_7HG0746090
HORVU_MOREX_r3_5HG0511820
HORVU_MOREX_r3_7HG0661450
HORVU_MOREX_r3_6HG0558440
HORVU_MOREX_r3_4HG0346170
HORVU_MOREX_r3_5HG0457550
HORVU_MOREX_r3_UnG0753320
HORVU_MOREX_r3_4HG0335830
HORVU_MOREX_r3_6HG0598130
HORVU_MOREX_r3_2HG0162940
HORVU_MOREX_r3_7HG0662040
HORVU_MOREX_r3_1HG0061230
HORVU_MOREX_r3_1HG0086000
HORVU_MOREX_r3_5HG0419470
HORVU_MOREX_r3_3HG0322860
HORVU_MOREX_r3_1HG0094930
HORVU_MOREX_r3_1HG0061920
HORVU_MOREX_r3_5HG0469420
HORVU_MOREX_r3_5HG0536080
HORVU_MOREX_r3_6HG0559180
HORVU_MOREX_r3_5HG0449530
HORVU_MOREX_r3_3HG0292080
HORVU_MOREX_r3_1HG0094760
HORVU_MOREX_r3_1HG0024030
HORVU_MOREX_r3_6HG0556470
HORVU_MOREX_r3_2HG0217490
HORVU_MOREX_r3_2HG0191950
HORVU_MOREX_r3_2HG0216500
HORVU_MOREX_r3_6HG0596980
novel.4979
HORVU_MOREX_r3_2HG0198630
HORVU_MOREX_r3_6HG0597130
HORVU_MOREX_r3_3HG0238190
HORVU_MOREX_r3_3HG0267440
HORVU_MOREX_r3_1HG0021770
HORVU_MOREX_r3_2HG0168780
HORVU_MOREX_r3_1HG0057310
HORVU_MOREX_r3_7HG0748860
HORVU_MOREX_r3_6HG0541790
HORVU_MOREX_r3_1HG0069480
HORVU_MOREX_r3_3HG0226160
HORVU_MOREX_r3_6HG0574560
HORVU_MOREX_r3_7HG0724480
HORVU_MOREX_r3_2HG0176240
HORVU_MOREX_r3_7HG0654450
novel.6489
HORVU_MOREX_r3_6HG0546560
HORVU_MOREX_r3_3HG0317820
HORVU_MOREX_r3_4HG0402690
HORVU_MOREX_r3_3HG0220630
HORVU_MOREX_r3_2HG0115520
novel.1767
HORVU_MOREX_r3_6HG0598810
HORVU_MOREX_r3_3HG0297180
HORVU_MOREX_r3_5HG0526050
HORVU_MOREX_r3_4HG0340050
HORVU_MOREX_r3_6HG0613360
novel.3432
HORVU_MOREX_r3_1HG0011590
novel.6500
HORVU_MOREX_r3_5HG0515040
HORVU_MOREX_r3_3HG0297400
HORVU_MOREX_r3_2HG0210280
HORVU_MOREX_r3_7HG0723070
HORVU_MOREX_r3_2HG0201830
HORVU_MOREX_r3_6HG0631570
HORVU_MOREX_r3_6HG0573570
HORVU_MOREX_r3_5HG0531560
novel.5137
HORVU_MOREX_r3_5HG0508280
HORVU_MOREX_r3_1HG0091030

[truncated: 7 more sheets: lightyellow_gene_list, indianred4_gene_list, skyblue2_gene_list, skyblue3_gene_list, tan_gene_list, plum2_gene_list, yellow_gene_list]
