# Supplementary material for: Deciphering drought response mechanism in Tibetan qingke through comprehensive transcriptomic and physiological analysis
Source: Front Plant Sci. 2025 Jul 25;16:1633561. doi: 10.3389/fpls.2025.1633561 (PMC12331675; doi:10.3389/fpls.2025.1633561)
Supplement: Supplementary file 7 [file Table6.xlsx]

## Sheet: Supplementary Table S6
Supplementary Table S6. The CDS sequences of the identified genes.
>ASPR
ATGAAGCTCACCCACGTCGACGACAAGGCGGGCTACACCACGGAGGAGCGCGTGCGGCGCGCCGTTGCTGTAAGCCGGGAGCGCCTGGCCTACACGCAGCAGCAGCAGCAGCTTCGGGCGTCCGGCGACGTGAGCGCGCCGGTGCACCTGGCCACCCGGCAGTACATCGCCGAGTACCTCATCGGCGACCCGCCCCAGCGCGCGGCCGCCCTCATCGACACCGGCAGCAACCTCATCTGGACCCAGTGCGGGACGACGTGCGGCCTCAAGGCGTGCGCCAAGCAGGACTTGCCCTACTACAACCTGTCGCGCTCGTCGACCTTCGCGGCCGTGCCGTGCGCGGACAGCGCCAAGCTGTGCGCGGCCAACGGCGTGCACCTCTGCGGCCTGGACGGCAGC…
>HAB1
ATGGCGGCGGCGGTGTTCGCCGGGGACGGGGCCGCCGCGCGCGGGGGGTGCTCGGCGGAATGCGCCGGGGGGATCGAGAGGCCACCGGATCTCGGGAGCAGGGCGGGGGACGGGTGCGGCAAGCGGAGCGTGTACCTCATGGAGTGCGTGCCGCTGTGGGGCTGCGCCGCGGCGCGCGGCCGTGCCGCGGAGATGGAGGACGCGTGCGCCGCCGTGCCGCGCTTCGCTGCCCTGCCGGCGCGGATGCTCGCCAGCAGCCGTGAGCTGGACGGGATCGGGGGCGACTTCGACGCCGCCGAGCTCCGGCTCCCAGCGCACCTGTTCGGCGTCTACGATGGGCACGGCGGCTCGGAGGTCGCAAACTACTGCCGGGATAAGATCCACGTTGTGTTGAGAGAA…
>HVA22
ATGAGCAAGCTCTGGACCATCCTCACCCACCTCCACACCCTCGCAGGGCCTGGGGTGATGCTCCTGTATCCCTTGTATGCGTCGGTGCAGGCGATGGAGAGCCCGTCCAAGCTGGACGACGAGCAGTGGCTGGCCTACTGGATCCTCTACTCCTTCGTCACGCTCGTCGAGATGGTCCTCGAGTCCCTCATCTACTGGATACCGATCTGGTACGAGCTGAAGCTGCTGTTCCTGGCGTGGCTGGCGCTGCCCAACTTCAGGGGAGCGGCCTTCATCTACGACAGGTTCGTCAGGGAGCAGCTCAGGAAGCACGGCCTCACCAACCACCCCGGCAGCGGCATCAGCAGCAAGAAGGAGAACGGCGGCAGGGTCGACAAGTCGTCCTCGCCGTCGACGTCT…
>MGL
ATGGCCCACGTCCTCGCCGCCGCGGAGCCCCTCACCCTCCTCAAGCGCCCGACGCCGCAGAACGACGGCTTCGGCGACGACAACGGCAGCACGGAGGAGAAGGCACTCAAGGCGCGCCGCCGGGAGTCCGACCCGGCGGCGGCACTGGCCGCGGCGCGTCACGAGTTCGGCGAGCACGGCGGCGTGAACATGTCCATCGAGGCCTCGGCCACGTTCACCGTGATGGAGCCGGACACCATGCGCCGGCTCTTCACGGGGGAGCTGGGCCCGGAGCGCGGCGACCTGTACATCTACAGCCGCCACTTCAACCCGACGGTGCTGGCGCTGGGGCGGCAGATGGCCGCGCTGGAGGGGACCGAGGCCGCCTACTGCACGGCGTCCGGCATGTCGGCCATCTCG…
>PUT5
ATGACCGGCGGAGGCGAAGAAGACGTCCCTCAGCCGAGGCGGCGCCCCCTAACGGTGCTCCCCCTCGTCGCGCTCATCTTCTACGACGTCTCGGGCGGGCCGTTCGGCATCGAGGACTCTGTCCGCACCGGCGGCGGCGCGCTGCTCCCGCTCCTCGGCTTCCTCATCTTCCCGGTGATCTGGTCGCTCCCTGAGGCCCTCATCACCGCTGAGCTCGCCTCCGCCTTCCCCACCAACGCCGGCTACGTCGCCTGGGTCTCCGCCGCCTTCGGCCCCGCGGTCGCCTTCCTCGTCGGCTTCTCCAAGTGGGCCTCCGGCACCCTCGACAACGCGCTCTACCCGGTTCTCTTCCTCGACTACCTACGCTCCAGCGGGCTCGCCCTCGCGCCGCCGCTCCGC…
>PYL5
ATGCCGTGCATCCCGGCGTCCAGCCCCAGCATCCAGCACCACAACCACCACCACCGAGTCCTAGCAGGCGTCGGCGTCGGCGTCGGCATGGGGTGCGGCGCGGAGGCGGTCGTGGCCGCGGCCGGGACGGCAGGGATGAGGTGCGGGGAGCACGACTGCGAGGTCCCGGCGGAGGTGGCGCGGCACCACGAGCACGCGGAGCCGGGGTCCGGCCAGTGCTGCTCCGCGGTGGTGCAGCACGTGGCGGCGCCCGCGGCGGCGGTGTGGTCCGTGGTGCGGCGGTTCGACCAGCCGCAGGCGTACAAGCGGTTCGTGCGCAGCTGCGCTCTTGTGGCCGGCGACGGCGGCGTGGGCACGCTCCGCGAGGTGCACGTCGTGTCGGGCCTCCCCGCGGCGTCC…
>SMO1
ATGCTGCCGTACGCGACGACCGGCGATGCGGAGGCGGCGCTCGGCCGCGCCCTGACGTGGGCGGAGGCCGCGTGGCTCCGCTACTCGGCGTCCGTGCCGGACCGCTACCTCCACTGGCCCAACATCGCCATCACATTGGTCGTCTACACGCTGGCGCCGCTGCCGCTCGCCCTCTTCGACCTCGCCGCCCCGGCCGTCGCCGCGCCGTACAAGCTGCAGCCCAAGGTGCAGCACCCGCCCGCCACCTTCTTCCGCTGCTACATGGACGCCGTTCGGGTCTCGCTGCTCATCATCGGGCCATACCAGCTCATCTCCTATCCCGCCGCAAAGATAATGGACATACGGACGGGACTTCCATTGCCGTCAATGGGGGAAATAGCAGCGCAACTGACGGTATAC…
