# Supplementary material for: Deciphering drought response mechanism in Tibetan qingke through comprehensive transcriptomic and physiological analysis
Source: Front Plant Sci. 2025 Jul 25;16:1633561. doi: 10.3389/fpls.2025.1633561 (PMC12331675; doi:10.3389/fpls.2025.1633561)
Supplement: Supplementary file 8 [file Table7.xlsx]

## Sheet: Supplementary Table S7
Supplementary Table S7. The list of primers used in this study.
HVA22-F	ATGAGCAAGCTCTGGACCAT
HVA22-R	GTGATCTTTCTTGGGTGCGAC
SMO1-F	ATGCTGCCGTACGCGACG
SMO1-R	CTCCTGCTTTCCGCTGTTGA
HAB1-F	ATGGCGGCGGCGGTGTTC
HAB1-R	GGATTTGCCCTTGGGCTTCTTT
HAI3-F	ATGTCGATGGCGCAGGTGT
HAI3-R	TAAATGGTTCTTTGGCCGGA
PYL5-F	ATGCCGTGCATCCCGGCGT
PYL5-R	CGACACGGCGGCGAGTTTCT
MGL-F	ATGGCCCACGTCCTCGCCG
MGL-R	GACGGCCTTGCCGTACTTGG
PUT5-F	ATGACCGGCGGAGGCGAAGA
PUT5-R	CTTGGCCTTGCTGGCCACTT
ASPR-F	ATGGCGCGAACTTTTGTGTT
ASPR-R	GAGCACGCTGCAGTCAGCGG
HVA22-101-F	aaaaaagcaggctcttcgcgaATGAGCAAGCTCTGGACCAT
HVA22-101-R	ctcgcccttgctcaccctaggGTGATCTTTCTTGGGTGCGAC
HVA22-YES2-F	attaagcttggtaccgagctcATGAGCAAGCTCTGGACCAT
HVA22-YES2-R	tgatggatatctgcagaattcTCAGTGATCTTTCTTGGGTGCGAC
ASPR-101-F	aaaaaagcaggctcttcgcgaATGAAGCTCACCCACGTCGA
ASPR-101-R	ctcgcccttgctcaccctaggGCTGCAGTCAGCGGTCTG
ASPR-YES2-F	attaagcttggtaccgagctcATGAAGCTCACCCACGTCGA
ASPR-YES2-R	tgatggatatctgcagaattcTCAGCTGCAGTCAGCGGTCTG
PYL5-101-F	aaaaaagcaggctcttcgcgaATGCCGTGCATCCCGGCGT
PYL5-101-R	ctcgcccttgctcaccctaggCGACACGGCGGCGAGTTTCT
PYL5-YES2-F	attaagcttggtaccgagctcATGCCGTGCATCCCGGCGT
PYL5-YES2-R	tgatggatatctgcagaattcTCACGACACGGCGGCGAGTTTCT
SMO1-101-F	aaaaaagcaggctcttcgcgaATGCTGCCGTACGCGACG
SMO1-101-R	ctcgcccttgctcaccctaggCTCCTGCTTTCCGCTGTTGA
SMO1-YES2-F	attaagcttggtaccgagctcATGCTGCCGTACGCGACG
SMO1-YES2-R	tgatggatatctgcagaattcTCACTCCTGCTTTCCGCTGTTGA
HAB1-101-F	aaaaaagcaggctcttcgcgaATGGCGGCGGCGGTGTTC
HAB1-101-R	ctcgcccttgctcaccctaggGGATTTGCCCTTGGGCTTCTTT
HAB1-YES2-F	attaagcttggtaccgagctcATGGCGGCGGCGGTGTTC
HAB1-YES2-R	tgatggatatctgcagaattcTCAGGATTTGCCCTTGGGCTTCTTT
MGL-101-F	aaaaaagcaggctcttcgcgaATGGCCCACGTCCTCGCCG
MGL-101-R	ctcgcccttgctcaccctaggGACGGCCTTGCCGTACTTGG
MGL-YES2-F	attaagcttggtaccgagctcATGGCCCACGTCCTCGCCG
MGL-YES2-R	tgatggatatctgcagaattcTCAGACGGCCTTGCCGTACTTGG
PUT5-101-F	aaaaaagcaggctcttcgcgaATGACCGGCGGAGGCGAAGA
PUT5-101-R	ctcgcccttgctcaccctaggCTTGGCCTTGCTGGCCACTT
PUT5-YES2-F	attaagcttggtaccgagctcATGACCGGCGGAGGCGAAGA
PUT5-YES2-R	tgatggatatctgcagaattcTCACTTGGCCTTGCTGGCCACTT
