# Supplementary material for: Deciphering drought response mechanism in Tibetan qingke through comprehensive transcriptomic and physiological analysis
Source: Front Plant Sci. 2025 Jul 25;16:1633561. doi: 10.3389/fpls.2025.1633561 (PMC12331675; doi:10.3389/fpls.2025.1633561)
Supplement: Supplementary file 9 [file Table8.xlsx]

## Sheet: Supplementary Table S8
Supplementary Table S8. List of key gene names
HORVU_MOREX_r3_5HG0437090	HvHVA22
HORVU_MOREX_r3_4HG0347570	HvSMO1
HORVU_MOREX_r3_5HG0473680	HvHAI3
HORVU_MOREX_r3_4HG0383820	HvPYL5
HORVU_MOREX_r3_3HG0284740	HvHAB1
HORVU_MOREX_r3_1HG0050330	HvMGL
HORVU_MOREX_r3_5HG0439020	HvASPR
HORVU_MOREX_r3_5HG0439620	HvPUT5
